# Supplementary material
Source: PubMed Central journal article supplement (PMC6290103)
Supplement: ba014639-suppl1.pdf [file ba014639-suppl1.pdf]

## Supplemental Figure 1. T-cell VJ rearrangement repertoire of a polyclonal donor.



(A) A037 healthy reference sample: Unique alpha chain VJ combinatorial counts.



(B) A037 healthy reference sample: Unique beta chain VJ combinatorial counts.



(C) A037 healthy reference sample: Unique gamma chain VJ combinatorial counts.



(D) A037 healthy reference sample: Unique delta chain VJ combinatorial counts.





(F) Number of unique clonotypes identified with respect to number of reads from downsampled sequencing data sets from A037 CD3 and PBMC cell populations. From right to left, each point represents the number of unique clonotypes when reads were reduced by half. The capture panel consisting of either (V) probes or both V and J probes (VJ) is indicated in the legend along with amounts of genomic DNA used to generate the initial library subsequently used for CapTCR-seq.

**Supplemental Figure 2- Fractional prevalences of beta locus VJ gene rearrangements observed in TCR rearrangements by CapTCR-Seq and Lymphotrack (MiXCR).** Comparison of unique VJ fraction prevalence between A037 samples assessed by CapTCR-seq and Lymphotrack (Invivoscribe PCR). Each point represents fraction of total observed rearrangements for each pair of TRB V and J alleles.



(A) Sample A037



(B) Sample H128

### H129 Capture vs Lymphotrack VJ Pair Fractional Prevalence



(C) Sample H129

### H130 Capture vs Lymphotrack VJ Fractional Prevalence



(D) Sample H130

### H131 Capture vs Invivoscribe VJ Fractional Prevalence



(E) Sample H131

### H132 Capture vs Invivoscribe VJ Fractional Prevalence



(F) Sample H132

## H133 Capture vs Invivoscribe VJ Fractional Prevalence



(G) Sample H133

Supplemental Figure 3. Cell line and tumor isolate T-cell clonality.



(A) Alpha chain VJ rearrangements. Boxes represent individual unique VJ pairs and box size reflects abundance in sample. Samples are ordered left to right in terms of decreasing clonality based on prevalence of top clone.



(B) Delta chain VJ rearrangements. Boxes represent individual unique VJ pairs and box size reflects abundance in sample. Delta rearrangements were not observed for all

samples. Samples are ordered left to right in terms of decreasing clonality based on prevalence of top clone.



(C) Sanger sequencing validation of individual VJ rearrangements from hybrid-capture sample data with the number of times the given VJ rearrangement was observed plotted on the y-axis. VJ rearrangements that failed to generate a dominant band upon PCR amplification tended to be those with low observation counts.

### Supplemental Figure 4. Clinical sample T-cell clonality.



(A) Alpha chain. Boxes represent individual VJ rearrangements and box size reflects abundance in sample. Samples are ordered left to right in terms of decreasing clonality based on prevalence of top clone.



(B) Delta chain. Boxes represent individual VJ rearrangements and box size reflects abundance in sample. Samples are ordered left to right in terms of decreasing clonality based on prevalence of top clone. Delta rearrangements were not observed for all samples.

## Supplemental Tables

Table 1: Probe Sequences

| Gene          | 120bp capture probe sequence                                                                           |
|---------------|--------------------------------------------------------------------------------------------------------|
| TRAV1-1*02    | caggtcgtttttcttctcattccttagctcctctagtagttatggttacctcctctacaggagctccagatgaaagactctgcctcttactctgcgctgt   |
| TRAV1-2*02    | catctgggttcaacgggctgttctgggtaccagcaacatgctggcgaagcaccacatttctgtcttacaatgttctggatggctggaggagaaggctcg    |
| TRAV12-1*02   | acagcacacgtcaatagagccagccagatatttccctgctcatcagagactccaagctcagtgattcagccacctactctgtgtggtgaacattcgcc     |
| TRAV12-2*02   | gtttacagcacagctcaataaagccagccagtagtgttctctgctcatcagagactcccagcccagtgattcagccacctactctgtgccgtgaccac     |
| TRAV12-2*03   | aaggtttacagcacagctcaataaagccagccagtagtgttctctgctcatcagagactcccagcccagtgattcagccacctactctgtgccgtgaac    |
| TRAV12-3*02   | agggtttacagcacaggtcgataaattccagcaagtagtattctctgtctcatcagagactcacagcccagtgattcagccacctactctgtgcaatgagcg |
| TRAV13-1*02   | tgttacattgaacaagacagccaaacatttccctgcatcacagagaccaacctgaagactggctgttactctgtgagcaagtaggaaggac            |
| TRAV13-1*03   | gcttattatagacattcggtcaaatgtggcgaaaagaagaccaacgaattgctgttacattgaacaagacagccaaacatttccctcagatcaca        |
| TRAV13-2*02   | caaagagtcaccgttttattgaataagcagtagaaactctctctgcaaatgacagctactcaactggagactcagctgtctactttgtgcagaga        |
| TRAV14/DV4*03 | aggctgctactcattgaatttccagaaggcaagaaaatccgcaacctgtcatctccgcttcacaactggggactcagcaatgtattctgtgcaatg       |
| TRAV14/DV4*04 | gcaacagaaggctcgtactcattgaatttccagaaggcaagaaaatccgcaacctgtcatctccgcttcacaactggggactcagcaatgtacttct      |
| TRAV2*02      | gggacgatacaacatgacctatgaacgggttctcttcatcgtctcctcaggtgctgggagggcagatgctgctgtttactactgtgctgtggcctgg      |
| TRAV20*02     | aaaggagaagaaggctaaaagccacattaacaagaaggaaagctttctgcacatcacagcccctaaacctgaagactcagccacttatctctgtgct      |
| TRAV20*03     | agaaaaggagaagaaggctaaaagccacattaacaagaaggaaagctttctgcacatcacagcccctaaacctgaagactcagccacttatctctgtgct   |
| TRAV20*04     | aaaggagaagaaggctaaaagccacattaacaagaaggaaagctttctgcacatcacagcccctaaacctgaagactcagccacttatctctgtgct      |
| TRAV21*02     | aagtgaagacttaatgctcctgctggataaatcagagcgtagtagttatatacattgcagcttctcagcctggtgactcagccacctactctgtgct      |
| TRAV23/DV6*02 | agattcacaatctccttcaataaaagtgccaagcagttctcattgcatatcatggattcccagcctggagactcagccacctactctgtgagcaagcg     |
| TRAV23/DV6*03 | agattcacaatctccttcaataaaagtgccaagcagttctcattgcatatcatggattcccagcctggagactcagccacctactctgtgagcaagca     |
| TRAV23/DV6*04 | gaaagaaggagattcacaatctccttcaataaaagtgccaagcagttctcattgcatatcatggattcccagcctggagactcagccacctactctgtg    |
| TRAV24*02     | ggacgaataagtgccacttataaccaaggagggttacagctattgtatcaaaagatcccagcctgaagattcagccacatacctctgtgcttata        |
| TRAV26-1*02   | ctctgatcatcacagaagacagaaagtcagcacttgatcctgccccagctacgctgagagacactgctgtgactattgcatgtagagattgggt         |
| TRAV26-1*03   | caatgaaatggcctctctgatcatcacagaagacagaaagtcagcacttgatcctgccccagctacgctgagagacactgctgtgactattgcatc       |
| TRAV26-2*02   | ccctcccagggtccagagtagctgattcattggttacaagcaatgtgaacaacagaatggcctgtgtggcaatcgtggaagacagaaagtcagctact     |
| TRAV27*02     | tgaagagactaaccttcagtttggatgcaagaagagcagttctctccacatcactgcccagcctggatgatacaggccactactctgtgagcgg         |
| TRAV27*03     | gctgaagagactaaccttcagtttggatgcaagaagagcagttctctccacatcactgagcccagactggtgatacaggccctactctgtgca          |
| TRAV29/DV5*02 | aagattcactgttttctaaacaaaagtgccaagcactctctctgacattgtgccctcccagcctggagactctgagtgacttctgtgagcaagc         |
| TRAV29/DV5*03 | agattcactgttttctaaacaaaagtgccaagcactctctctgacattgtgccctcccagcctggagactctgagtgacttctgtgagcaagcg         |
| TRAV3*02      | ctttgaagctgaatttaacaagagccaaacctctccacctgaagaacacctctgcccctgtgagcactccgctttgtacttctgtgctgtgagacc       |
| TRAV30*02     | ctgtgaaaaaatatctgcttattaatgaaaaaagcagcaagctccctgtaccttacggcctcccagctcagttactcaggaacctacttctgcggg       |
| TRAV30*03     | tcatgaaaaaatatctgcttattaatgaaaaaagcggcaagctccctgtaccttacggcctcccagctcagttactcaggaacctacttctgcggc       |
| TRAV30*04     | tcctgatgataattcgaagggtggagaacagaagctcatgaaaaaatatctgcttattaatgaaaaaagcagcaagctccctgtaccttacggc         |
| TRAV35*02     | aaatggaagactgactgctcagtttggataaccagaaggacagcttctgaaatctcagcatccatacctagtgatgtaggcatctacttctgtgct       |
| TRAV36/DV7*02 | ggaagactaagtagcatattagataagaagaactttcagcatcctgaacatcacagccaccagaccggagactcggcctctactctgtgctggtg        |
| TRAV36/DV7*03 | gtcaggaagactaagtagcatattagataagaagaactttcagcatcctgaacatcacagccaccagaccggagactcggcctctactctgtgctg       |
| TRAV36/DV7*04 | tcaggaagactaagtagcatattagataagaagaactttcagcatcctgaacatcacagccaccagaccggagactcggcctctactctgtgctg        |
| TRAV38-1*02   | gagaatcgtttctctggaactccagaagcagccaaacctctcagctcaagatctcagactcacagctgggggacactgcatgtatttctgtgctt        |
| TRAV38-1*03   | aatcgtttctctggaactccagaagcagccaaacctctcagctcaagatctcagactcacagctgggggacactgcatgtatttctgtgcttca         |

| Gene            | 120bp capture probe sequence                                                                         |
|-----------------|------------------------------------------------------------------------------------------------------|
| TRAV38-1*04     | ggagaatcgttttctctgtgaactccagaaagcagccaatccttcagtcctcaagatctcagactcacagctgggggactcgcgatgtatttctgtgca  |
| TRAV6*02        | gaaagaagactgaaggtcacctttgataccacccttaaacagagttgtttcatatcacagctcccagcctgcagactcagctacctactctgtgct     |
| TRAV6*03        | gaaagaagactgaaggtcacctttgataccacccttaaacagagttgtttcatatcacagctcccagcctgcagactcagctacctactctgtgct     |
| TRAV6*04        | gaaagaagactgaaggtcacctttgataccacccttaaacagagttgtttcatgtcacagctcccagcctgcagactcagctacctactctgtgct     |
| TRAV6*05        | gaaagaagactgaaggtcacctttgataccacccttaaacagagttgtttcatatcacagctcccagcctgcagactcagctacctactctgtgct     |
| TRAV6*06        | ccaggaagaggcctgttttctgtactcatcagtgaaaatgagaaagaaaaagaaagaaagactgaaggtcacctttgataccacccttaaccaga      |
| TRAV8-1*02      | ttttcaggggatccactggtaaggcatcaaggcggtgaggctgaattataaagagtaaattcctttaatctgaggaaacctctgtgcagtggga       |
| TRAV8-2*02      | tttaagaagagtgaacctctccacctgacgaaacctcagcccatatgagcgacggcgctgagtacttctgtgtgtgaccgctcacgagcttcag       |
| TRAV8-3*02      | aggcttgaggctgaatttaagaggagtaacttctcctcaacctgaggaaacctctgtgcattggagtgatgctgctgagtacttctgtgctgggt      |
| TRAV8-3*03      | tattaaaggcttgaggctgaatttaagaggagtaacttctcctcaactgaggaaacctctgtgcattggagtgatgctgctgagtacttctgtgct     |
| TRAV8-4*02      | gaatttaagaagagtgaacctctccacctgacaaaacctcagcccatatgagcgacggcgctgagtacttctgtgctgtgagtgatctcgaaccga     |
| TRAV8-4*03      | catcaacggtttgaggctgaatttaagaagagtgaacctctccacctgacgaaacctcagcccatatgagcgacggcgctgagtacttctgtgct      |
| TRAV8-4*04      | aggcatcaacggtttgaggctgaatttaagaagagtgaacctctccacctgacgaaacctcagcccatatgagcgacggcgctgagtacttctgt      |
| TRAV8-4*05      | ggctgaatttaagaagagtgaacctctccacctgacgaaacctcagcccatatgagcgacggcgctgagtacttctgtgctgtgagtgatctcca      |
| TRAV8-4*06      | gaatttaagaagagtgaacctctccacctgacgaaacctcagcccatatgagcgacggcgctgagtacttctgtgctgtgagtgatctcgaaccga     |
| TRAV8-4*07      | acggtttgaggctgaatttaaaagagtgaacctctccacctgacgaaacctcagcccatatgaccgaccggctgagtacttctgtgctgtgag        |
| TRAV9-2*02      | caacaaggtttgaaagccataccgtaagaaaccttcttccacttggagaaaggctcagttcaagtgctgagactcagcggtgacttctgtgct        |
| TRAV9-2*03      | caacaaggtttgaaagccataccgtaagaaaccttcttccacttggagaaaggctcagttcaagtgctgagactcagcggtgacttctgtgct        |
| TRAV9-2*04      | caacaaggtttgaaagccataccgtaagaaaccttcttccacttggagaaaggctcagttcaagtgctgagactcagcggtgacttctgtgct        |
| TRBV10-1*03     | ctaacaaggagaagtctcagatggctacagtgctctagatcaaacacagaggacctccccctactctgtagtctgtcctcctcccagacatctgt      |
| TRBV10-2*02     | agataaaggagaagtcctcagatggctacgttctcctcagatccaagacagagaattccccctactctggagtcagctaccgctcccagacatctgtg   |
| TRBV10-3*03     | agaagtcctcagatggctatagtgctctagatcaaagacagaggatttctcctcactctggagtcctctaccagctcccagacatctgtgacttctgt   |
| TRBV10-3*04     | agaagtcctcagatggctatagtgctctagatcaaagacagaggatttctcctcactctggagtcctctaccagctcccagacatctgtgacttctgt   |
| TRBV11-2*02     | ggatcgattttctgcagagaggctcaaaggagtagactccactcctcaagatccagcctgcaaagcttgagaactcggcctgtatctctgtccagcagc  |
| TRBV11-2*03     | ggatcgattttctgcagagaggctcaaaggagtagactccactcctcaagatccagcctgcaaagcttgaggactcggcctgtatctctgtccagcagc  |
| TRBV11-3*02     | ggatcgattttctgcagagaggctcaaaggagtagactccactcctcaagatccagcctgcaaagcttgaggactcggcctgtatctctgtccagcagc  |
| TRBV11-3*03     | ggatcgattttctgcagagaggctcaaaggagtagactccactcctcaagatccagcctgcaaagcttgaggactcggcctgtatctctgtccagcagc  |
| TRBV12-4*02     | tcgattctcagctaagatcctaataatcattctcactctgaggatccagcctcagaaccagggactcagctgtgacttctgtgcccagcagttta      |
| TRBV13*02       | tgatcgattctcagctcaacagttcagtgactatcattctgaactgaacatgagctccttggagctgggggactcagcctgtacttctgtgcccagcagc |
| TRBV14*02       | caatcgattcttagctgaaaggactggaggagctatttctacttgaaggtgcagcctgcagaactggaggattctggagttatttctgtgcccagcagc  |
| TRBV15*02       | tgataactccaatccaggagccgaaccttcttctgtcttctgacatccgctcaccaggcctgggggacgcagccatgtacctgtgtgcccaccagc     |
| TRBV15*03       | tgataactccaatccaggagccgaaccttcttctgtcttctgacatccgctcaccaggcctgggggacgcagccatgtaccagtggtgcccaccagc    |
| TRBV16*03       | ggaagatttctcagtaagtgcctccaatccacctgtagcctgagatccaggctcgaagcttgaggattcagcagtgatattttgtgcccagcagc      |
| TRBV19*03       | tgaagggtacagcgtctctcgggagaagaagaatccttctcctcactgtgacatcgcccaaaagaaccgacagcttctatctctgtgcccagtagc     |
| TRBV2*02        | tgatcaattctcagttgaaaggcctgatggatcaaattcactctgaagatccgggtccaaaagctggaggactcagccatgtacttctgtgcccagcagc |
| TRBV2*03        | tcaattctcagttgagaggcctgatggatcaaattcactctgaagatccgggtccaaaagctggaggactcagccatgtacttctgtgcccagcagtgaa |
| TRBV20-1*02     | gaaggacaagtttctcatcaacctgcaagcctgacctgttccactctgacagtgaccagtgcccatcctgaagacagcagcttctacatctgcagtgct  |
| TRBV20-1*04     | ggacaagtttctcatcaacctgcaagcctgacctgttccactctgacagtgaccagtgcccatcctgaagacagcagcttctacatctgcagtgctagt  |
| TRBV20-1*05     | ggacaagtttctcatcaacctgcaagcctgacctgttccactctgacagtgaccagtgcccatcctgaagacagcagcttctacatctgcagtgctaga  |
| TRBV20-1*06     | gaaggacaagtttctcatcaacctgcaagcctgacctgttccactctgacagtgaccagtgcccatcctgaagacagcagcttctacatctgcagtgct  |
| TRBV20-1*07     | ggacaagtttctcatcaacctgcaagcctgacctgttccactctgacagtgaccagtgcccatcctgaagacagcagcttctacatctgcagtgctaga  |
| TRBV20/OR9-2*02 | gaaggacaagtttccatcaacctcaaacctgaccttctcctgctgacagtgacctgtgcccctcctgaagacagcagcttctacatctgcagtgct     |

| Gene            | 120bp capture probe sequence                                                                     |
|-----------------|--------------------------------------------------------------------------------------------------|
| TRBV23/OR9-2*02 | gTTTTGATTCCTTCAGAAATGAACAAGTCTTCAAGAAATGGAGATGCACAAGAAGCGATTCTCATCTCAATGCCCAAGAACGCACCTGCAGCCTG  |
| TRBV24/OR9-2*02 | CAGTTGATCTATTGCTCTTGTAGTCAAAATATAAACAAGAGAGATCTCTGATGGATACAGTGTCTTGCAGGAACAGGCTAAATTCCTCG        |
| TRBV25/OR9-2*02 | GAGTTAATCCACAGAGAAGGGAGATCTTGTCTGTAGTCAACAGTCTCCAGAATAAGGATAGAGCGTTTTCCCTGACCTGGAGTCTGCCACCCCTC  |
| TRBV29-1*02     | TGACAAGTTCCCATCAGCGCCCAACCTAACATCTCAAGTGTACTGTGAGCAACATGAGCCCTGAAGACAGCAGCATATATCTCTGCAGCGTTGAA  |
| TRBV29-1*03     | TGACAAGTTCCCATCAGCGCCCAACCTAACATCTCAAGTGTACTGTGAGCAACATGAGCCCTGAAGACAGCAGCATATATCTCTGCAGCGGGGC   |
| TRBV3-1*02      | TCCAAATCGATTCTCACCTAACCTCCAGACAAAGCTAAATAATCTTCACATCAATCCCTGGAGCTGGTACTCTGTGTATTCTGTGCCAGC       |
| TRBV3-2*03      | TCGCTTCCACTGACTCTCCAGACAAAGTTCATTAATCTTCACATCAATCCCTGGAGCTGGTACTCTGTGTATTCTGTGCCAGCAGCAA         |
| TRBV30*02       | AGAATCTCTCAGCTCCAGACCCAGGACCGCAGTTCATCTGAGTTCTAAGAAGCTCTCTCAGTACTCTGGCTTCTATCTCTGTGCTGGAGTGT     |
| TRBV30*04       | CCAGAATCTCTCAGCTCCAGACCCAGGACCGCAGTTCATCTGAGTTCTAAGAAGCTCTCTCAGTACTCTGGCTTCTATCTCTGTGCTGGAGT     |
| TRBV30*05       | CCAGAATCTCTCAGCTCCAGACCCAGGACCGCAGTTCATCTGAGTTCTAAGAAGCTCTCTCAGTACTCTGGCTTCTATCTCTGTGCTGGGGA     |
| TRBV4-1*02      | TCGCTTCCACTGAATGCCCAACAGCTCTCTTAAACCTTCACCTACACCCCTGCAGCCAGAAGACTCAGCCGTATCTCTGCAGCAGCAGCAA      |
| TRBV4-2*02      | AAGTCCTTCCACTGAATGCCCAACAGCTCTCACTTATGCTTACCTACACCCCTGCAGCCAGAAGACTCGCCGTATCTCTGTGCCAGCACC       |
| TRBV4-3*02      | AAGTCCTTCCACTGAATGCCCAACAGCTCTCACTTATGCTTACCTACACCCCTGCAGCCAGAAGACTCGCCGTATCTCTGTGCCAGCAGC       |
| TRBV4-3*03      | AAGTCCTTCCACTGAATGCCCAACAGCTCTCACTTATGCTTACCTACACCCCTGCAGCCAGAAGACTCGCCGTATCTCTGTGCCAGCAGC       |
| TRBV4-3*04      | AAGTCCTTCCACTGAATGCCCAACAGCTCTCACTTATGCTTACCTACACCCCTGCAGCCAGAAGACTCGCCGTATCTCTGTGCCAGCAGC       |
| TRBV5-1*02      | TCGATTCTCAGGGCCAGTTCCTAATCTCTGCTGTGAGATGAATGTGACACCTTGGAGCTGGGGACTCGCCCTTATCTTTCGCCAGCGCTTGC     |
| TRBV5-4*02      | TCCTAGATTCTCAGGTCCAGTTCCTAATAATAGCTCTGAGCTGAATGTGAACGCTTGGAGCTGGACGACTCGCCCTGTATCTCTGTGCCAGCAGC  |
| TRBV5-4*03      | TCCTAGATTCTCAGGTCCAGTTCCTAATAATAGCTCTGAGCTGAATGTGAACGCTTGGAGCTGGACGACTCGCCCTGTATCTCTGTGCCAGCAGC  |
| TRBV5-4*04      | TCCTAGATTCTCAGGTCCAGTTCCTAATAATAGCTCTGAGCTGAATGTGAACGCTTGGAGCTGGACGACTCGCCCTGTATCTCTGTGCCAGCAGC  |
| TRBV5-5*02      | TGATCGATTCTCAGCTCGCAGTTCCTAATAATAGCTCTGAGCTGAATGTGAACGCTTGTGCTGGGGACTCGCCCTGTATCTCTGTGCCAGCAGC   |
| TRBV5-5*03      | TGATCGATTCTCAGCTCGCAGTTCCTAATAATAGCTCTGAGCTGAATGTGAACGCTTGTGCTGGGGACTCGCCCTGTATCTCTGTGCCAGCAGC   |
| TRBV5-8*02      | TCCTAGATTCTCAGGTCCAGTTCCTAATAATAGCTCTGAGCTGAATGTGAACGCTTGGAGCTGGAGGACTCGCCCTGTATCTCTGTGCCAGCAGC  |
| TRBV6-2*02      | TGGCTACAATGTCTCCAGATAAAAAACAGAAATTTCTCTGGGGTGGAGTGGCTGCTCCTCCCAACATCTGTACTCTGTGCCAGCAGCCCT       |
| TRBV6-6*03      | GAATGGCTACAAGTCTCCAGATCAACCACAGAGGATTTCCGCTCAGGCTGGAGTGGCTGCTCCTCCAGACATCTGTACTCTGTGCCAGCAGT     |
| TRBV6-6*04      | TGGCTACAATGTCTCCAGATCAACCACAGAGGATTTCCGCTCAGGCTGGAGTGGCTGCTCCTCCAGACATCTGTACTCTGTGCCAGCAGTGA     |
| TRBV6-6*05      | GAATGGCTACAAGTCTCCAGATCAACCACAGAGGATTTCCGCTCAGGCTGGAGTGGCTGCTCCTCCAGACATCTGTACTCTGTGCCAGCAGC     |
| TRBV7-2*03      | GCTTCTCTCAGAGAGGACTGGGGAATCCGCTCCTCAGTCAAGATCCAGCGCACAGAGCAGGAGGACTCGCCGTATCTCTGTACCAGCAGCTTAGC  |
| TRBV7-2*04      | TCGCTTCTCTCAGAGAGGACTGGGGAATCCGCTCCTCAGTCAAGATCCAGCGCACAGAGCAGGAGGACTCGCCGTATCTCTGTGCCAGCAGCTTA  |
| TRBV7-3*04      | CGATCGGTTCTTTCAGTCAGGCTGAGGATCCGCTCTACTCTGAAGATCCAGCGCACAGAGCAGGAGGACTCGCCGTATCTCTGTGCCAGCAGC    |
| TRBV7-3*05      | CGATCGGTTCTTTCAGTCAGGCTGAGGATCCGCTCTACTCTGAAGATCCAGCGCACAGAGCAGGAGGACTCGCCGTATCTCTGTGCCAGCAGC    |
| TRBV7-4*02      | AACGAGACAAATCAGGGCGCCAGTGGTGGTCTCTCAGAGAGGCTGAGAGATCGTCTCCTCCAGATCCAGCGCACAGAGCAGGAGGAGTCA       |
| TRBV7-6*02      | TGATCGGTTCTCTCAGAGAGGCTGAGGATCCATCTCCTCAGTCAAGATCCAGCGCACAGAGCAGGAGGACTCGCCATGTATCTCTGTGCCAGCAGC |
| TRBV7-7*02      | TGATCGGTTCTCTCAGAGAGGCTGAGGATCCATCTCCTCAGTCAAGATCCAGCGCACAGAGCAGGAGGACTCGCCATGTATCTCTGTGCCAGCAGC |
| TRBV7-8*03      | TCGCTTCTTTCAGAAAGCCTGAGGGATCCGCTCCTCAGTCAAGATCCAGCGCACAGAGCAGGAGGACTCGCCGTATCTCTGTGCCAGCAGCGA    |
| TRBV7-9*02      | TCGGTCTCTCAGAGAGGCTAAGGATCTTCTCCACTTGGAGATCCAGCGCACAGAGCAGGAGGACTCGCCATGTATCTCTGTGCCAGCAGCTTA    |
| TRBV7-9*04      | TCGGATCTCTCAGAGAGGCTAAGGATCTTCTCCACTTGGAGATCCAGCGCACAGAGCAGGAGGACTCGCCATGTATCTCTGTGCCAGCAGCTCT   |
| TRBV7-9*05      | TCGGTCTCTCAGAGAGGCTAAGGATCTTCTCCACTTGGAGATCCAGCGCACAGAGCAGGAGGACTCGCCATGTATCTCTGTGCCAGCACAAA     |
| TRBV7-9*06      | TCGGTCTCTCAGAGAGGCTAAGGATCTTCTCCACTTGGAGATCCAGCGCACAGAGCAGGAGGACTCGCCATGTATCTCTGTGCCAGCAGCTTG    |
| TRBV7-9*07      | GTTCTCTCAGAGAGGCTAAGGATCTTCTCCACTTGGAGATCCAGCGCACAGAGGAGGAGGACTCGCCATGTATCTCTGTGCCAGCAGCAGT      |
| TRBV9*03        | TGAACGATTCTCCGACAAAGTTCCTGACTTCACTCTGAACCTGAGCTCTGAGCTGGAGCTGGGGACTCAGCTTGTATTCTGTGCCAGCAGC      |
| TRGV2*02        | GAAGTATTACTACGCAAGCACAAGGAACAATGAGATTGATACTCAAAATCTAATTGAAAATGACTCTGGGCTATTACTGTCCACCTGGGAC      |
| TRBV20-1*03     | GAAGGACAAGTTCTCATCAACCTGCAAGCTGACTTGTCACTGTGACAGTACCAGTCCCATCTGAAGACAGCAGCTCTCATCTGCAGTGTCT      |

| Gene            | 120bp capture probe sequence                                                                        |
|-----------------|-----------------------------------------------------------------------------------------------------|
| TRGV6*01        | gcatgatacttatggaagtagaaggataagctggaaattatacctccaaaactaaatgaaaatgcctctggggtcttactgtgccacctaggacagg   |
| TRGV4*02        | gtatgatacttacggaagcacaaggaagaacttgagaatgatactgcgaaatcttattgaaaatgactctggagtcttactgtgccacctgggatggg  |
| TRGV5P*01       | gtattatactcatacaccgaggagggtggagctggaatttgagactgcaaaatctaattgaaaatgattctggggtcttactgtgccacctggggcagg |
| TRBV10-3*02     | gctatagtgtctctagatcaaagacagaggatttctcctcactctggagctccgtaccagctcccagacatctgtgtactctgtgccatcagtgagtc  |
| TRBV24/OR9-2*01 | atacagtgctctcgacaggcacaggctaaattctcctgtccctagagctgctccatcccaaccagacagctctttactctgtgccaccagtgatttg   |
| TRBV20/OR9-2*01 | acaagtttccatcaaccatccaaactgaccttctccgctcgacagtgaccagtgccatcctgaagacagcagcttctacatctgcagtgctagaga    |
| TRGV11*01       | ggtaagtaaaaatgctcacacttccacttccactttgaaaaaaagtcttagagaagaagatgagggtgtaccactgtgctctggattaggcac       |
| TRBV7-8*02      | gcttcttgcagaaaggcctgaggatccgtctcactctgaagatccagcgcacacagaaggaggactccgctgtatctctgtgccagcagcttagc     |
| TRBV7-3*02      | ggttcttgcagtcaggcctgaggatccgtctcactctgaagatccagcgcacacagagcaggggactcagcctgtatctctgtgccagcagctaac    |
| TRGV10*01       | aggcaagaagaattctcaactctcacttcaatccttaccatcaagtcctgtagaagaagaagacatggcgttactactgtgctgctgggtggc       |
| TRGV9*02        | tgaggtaggtaggatacctgaaactctacacttccacttccacttcaaatgtagagaacaggacatagctactactgtgcttggggagggtg        |
| TRDV3*02        | gacggtttctgtgaaacacattctgaccagaaagccttctcacttgggtgatctctccagtaaggactgaagacagtgccacttactactgtgcttag  |
| TRDV2*02        | aattccaaggtagactgataattgcaaagaacctggctgtacttaagatactgaccatcagagagagatgaagggttactactgtgctgtgaca      |
| TRGV3*02        | agtattatactcatacaccaggagggtggagctggatattgagactgcaaaatctaattgaaaatgattctggggtcttactgtgccacctgggacag  |
| TRDV2*01        | ttccaaggtagactgataattgcaaagaacctggctgtacttaagatactgaccatcagagagagatgaagggttactactgtgctgtgacacc      |
| TRBV19*02       | ggtacagctctctcgggagaagaaggaatccttctcactgtgacatcgcccaaaagaaccgacagcttctactctgtgccagtagtataga         |
| TRAV14/DV4*01   | actcattgaatttcagaaggcaagaatccgccaacctgtcatctccgcttcaactgggggactcagcaatgtactctgtgcaatgagagaggg       |
| TRBV3-2*02      | gcttctcactgactctccagacaagttcattaaatctcacatcaatccctggagcttggtgactctgctgtgtattctgtgccagcagccaaga      |
| TRGV10*02       | tggaggcaagaagaatctcaactctcacttcaatccttaccatcaagtcctgtagagaagaagacatggcgttactactgtgctgctggggatta     |
| TRAV11*01       | caaatatttaagaactgcttgaaaagaaaaatttatagtttgaatatcgagcctctcatctgggagattcagccactactctgtgctttg          |
| TRBV5-2*01      | aactgctcaattgatctcagctcaccagctccataacttactgagtcacaacaggagctaggggactcagccctgtatctctgtgccagcaactg     |
| TRBV8-1*01      | ggaagggtacaatgtctctgaaacaagctcaagcatttccctcaaccctggagctactagcaccagccagacctctgtacctgtggcagtgcatc     |
| TRAV38-1*01     | tctctgtaacttcagaagcagccaatcctcagctcaagatctcagactcacagctgggggacactgcatgtatttctgtgcttcatgaagca        |
| TRBV22-1*01     | aggctactgtctgccaagaggagaaggggtatttctctcagggtgaagttggccacaccagccaacagcttctgtactctgtggagcgcac         |
| TRBV16*01       | gattttcagctaagtgctcccaatcaccctgtagccttgagatccaggctacgaagcttgaggattcagcagtgattttgtgccagcagccaatc     |
| TRBV30*01       | agaatctctcagctccagaccagcagcagcttcatctgagttcaagaagctctctcagctactgtgcttctatctctgtgctggagtg            |
| TRAV3*01        | tttgaagctgaatttaacaagagccaacctctccactgaagaaacctctgcttctgagcactcctgttactctgtgctgtgagagaca            |
| TRAV26-1*01     | gcctctctgatcatcacagaagacagaagtccagcacttcatctgctccccacgctacgctgagagacactgctgttactattgatctgcagagtcg   |
| TRAV32*01       | aggctcactgtactgtgaaataaaatgctaactgtctcctgcatattacagcccaaccaggagactcattcctgtactctgtcagtgagaa         |
| TRAV33*01       | gcaaagcctgtaactttgaaaaaaagaaagtcatcaactcaccatcaattccttaaaactgactcagccaagtactctgtgctctcaggaatcc      |
| TRBV13*01       | gattctcagctcaacagttcagtgactatcttgaactgaacatgagctcttggagctgggggactcagccctgtactctgtgccagcagcttagg     |
| TRBV15*01       | acttcaatccaggaggccgaacttcttctgtcttctgacatccgctcaccaggcctgggggacacagccatgtacctgtgtgccaccagcagaga     |
| TRAV2*01        | agggacgatacaacatgacatgaacggttcttctatcgtctcatcctccagggtcgggaggcagatgctgctttactactgtgctgtggagga       |
| TRBV7-1*01      | ggttctctgcacagagctgaggatccatctcactctgaagttccagcgcacacagcaggggactggctgtatctctgtgccagcagctcagc        |
| TRBV23-1*01     | gattctcatctcaatcccaagaacgaccctgagcctggcaatctctcctcagaaccgggagacaggcactgtatctctgcgaccagcagtaact      |
| TRBV23/OR9-2*01 | gatgcacaagaagcattctcatctcaatcccaagaaccaccctgagcctggcaatcctgctcctggaaccgggagacaccgactgtatctctgt      |
| TRBVA*01        | tcctattgaaaatattcctggcaaaaatagaagttcttcttggctgaaatctgcaactcctttcaggtgtccctgtgctctgtaccgtcactc       |
| TRBVA/OR9-2*01  | tcctgtgaaaatattcccgaaaaaacagaagttcccttggctgaaatctgcaaaccttctcagatgctcctgtgctctgtgctgctcactc         |
| TRBV12-1*01     | gattctcagcacagatcctgatgatattctcactctgaggatccagccatggaaaccagggactggcctaatttctgtgccagcagctttgc        |
| TRBV26/OR9-2*01 | ggtatcatgttcttgaataactatagcatcttctcctgaccctgaagctgctgtagaccaaccagacatgtgtgtatctctgcccagcagttcatc    |
| TRGV9*01        | tgaggtaggtaggatacctgaaactctacacttccacttccacttcaaatgtagagaacaggacatagctactactgtgcttggggagggtg        |
| TRGV8*01        | cttgaggcaagaacaatttcaaatgtctactcagcttaccataaacttcataggaaggaagatgaggccattactactgctgcttaggacc         |

| Gene            | 120bp capture probe sequence                                                                           |
|-----------------|--------------------------------------------------------------------------------------------------------|
| TRBV7-3*01      | ggttcttgcagtcaggcctgaggatccgtctctactctgaagatccagcgcacagagcgggggactcagccgtgtatctctgtgccagcagctaac       |
| TRBV7-9*01      | ggttctctgcagagaggcctaaggatctttccacctggagatccagcgcacagagcagggggactcggccatgtatctctgtgccagcagcttagc       |
| TRBV7-2*01      | gcttctctgcagagaggactgggggatccgtctcactctgacgatccagcgcacacagcagggaggactcggccgtgtatctctgtgccagcagcttagc   |
| TRBV7-2*02      | gcttctctgcagagaggactgggggatccgtctcactctgacgatccagcgcacacagcagggaggactcggccgtgtatctctgtgccagcagcttagc   |
| TRBV7-7*01      | ggttctctgcagagaggcctgaggatccatctcactctgacgatccagcgcacacagcagcggggactcagccatgtatctctgtgccagcagcttagc    |
| TRBV7-8*01      | gcttcttgcagaaaggcctgaggatccgtctcactctgaagatccagcgcacacagcagggaggactcggccgtgtatctctgtgccagcagcttagc     |
| TRBV17*01       | aacgattcacagctgaaagacctaacggaacgtctccacgctgaagatccatcccagagccgaggaggactcagccgtgtatctctacagtagcgggtg    |
| TRBV5-8*01      | agattttcaggtcgcagttccctaattatagctctgagctgaatgtgaacccctggagctggaggactcggccctgtatctctgtgccagcagcttagc    |
| TRBV5-7*01      | caattctcaggtcaccagttccctaactatagctctgagctgaatgtgaacccctgttctgaggggactcggccctctatctctgtgccagcagcttagc   |
| TRBV5-6*01      | cgattctcaggtcaccagttccctaactatagctctgagctgaatgtgaacccctgttctgaggggactcggccctctatctctgtgccagcagcttagc   |
| TRBV5-5*01      | cgattctcagctcgcagttccctaactatagctctgagctgaatgtgaacccctgttctgaggggactcggccctgtatctctgtgccagcagcttagc    |
| TRBV5-4*01      | agattctcaggtctcagttccctaattatagctctgagctgaatgtgaacccctggagctggagcactcggccctgtatctctgtgccagcagcttagc    |
| TRBV5-1*01      | cgattctcagggcgcagttctctaactctgctctgagatgaatgtgagcacttggagctgggggactcggcccttattcttgcggcagcagcttagc      |
| TRBV3-1*01      | gcttctcacaaatctccagacaaagctcactaaatctcacatcaattcctggagcttggtagctctgtgtatttctgtgccagcagccaaga           |
| TRBV1*01        | acttcacacctaagccctgacagctctcgttatactctatgtgctgactcagcaagaagactcagctcgtgtatctctgaccagcagccaaga          |
| TRBV5-3*01      | cgattctcagggcgcagttccatgactgtgtctgagatgaatgtgagtgcttggagctgggggactcggccctgtatctctgtgccagaagcttagc      |
| TRBV5-3*02      | cgattctcagggcgcagttccatgactgtgtctgagatgaatgtgagtgcttggagctgggggactcggccctgtatctctgtgccagaagcttagc      |
| TRBV9*01        | cgattctccgacaacagttccctgactctgactctgaactaaactgagctctctggagctgggggactcagcttgtatttctgtgccagcagcttagc     |
| TRBV3-2*01      | gcttctcactgactctccagacaaagctcattaaatctcacatcaattcctggagcttggtagctctgtgtatttctgtgccagcagccaaga          |
| TRBV2*01        | aattctcagttgaaaggcctgatggatcaaatttcaactctgaagatccgggtccaaaagctggaggactcagccatgtacttctgtgccagcagtgaaagc |
| TRBV4-3*01      | gcttctcactgaatgccccaacagctctcacttattcttccactcacacacctgcagccagaagactcggccctgtatctctgcccagcagccaaga      |
| TRBV4-1*01      | gcttctcactgaatgccccaacagctctctttaaacttcaactcacacacctgcagccagaagactcagccctgtatctctgcccagcagccaaga       |
| TRBV4-2*01      | gcttctcactgaatgccccaacagctctcacttattcttccactcacacacctgcagccagaagactcggccctgtatctctgtgccagcagccaaga     |
| TRAV34*01       | aagataactgccaagttggatgagaaaaagcagcaaaagttccctgcatacacagcctcccagcccagccatcagggcatctactctgtggagcagaca    |
| TRBV28*01       | ggtacagtgctctagagagaagaaggagcgttctccctgattctggagtcggccagcacaaccagacatctatgtacctctgtgccagcagttatg       |
| TRBV20-1*01     | acaagtttctcatcaaccatgcaagcctgacctgtccactctgacagtgaccagtgccatcctgaagacagcagcttctacatctgagctgtagaga      |
| TRBV20/OR9-2*03 | acaagtttccatcaaccatccaaactgaccttccgctctgacagtgaccagtgccatcctgaagacagcagcttctacatctgagctgtagaga         |
| TRBV6-6*02      | gaatggctacaacgtctccagatcaaccacagaggatttccgctcaggctggagtggtgctcctcccagacatctgtacttctgtgccagcagct        |
| TRBV6-6*01      | gctacaacgtctccagatcaaccacagaggatttccgctcaggctggagtggtgctcctcccagacatctgtacttctgtgccagcagttactc         |
| TRBV6-5*01      | gctacaatgtctccagatcaaccacagaggatttccgctcaggctgctgctggctgctcctcccagacatctgtacttctgtgccagcagttactc       |
| TRBV6-8*01      | gctacaatgtcttagatataaacacagaggatttccactcaggctgggtgctggctgctcctcccagacatctgtacttctgtgccagcagttactc      |
| TRBV6-9*01      | gctacaatgtatccagatcaaacacagaggatttccgctcaggctggagtcagctgctcctcccagacatctgtatacttctgtgccagcagttattc     |
| TRBV6-7*01      | gctacaatgtctccagatcaaacacagaggatttccctcaagctggagtcagctgctcctctcagacttctgttacttctgtgccagcagttactc       |
| TRBV12-3*01     | gattctcagtaagatgctaatgcatatttccactctgaagatccagcctcagaaccagggactcagctgtgtacttctgtgccagcagttatg          |
| TRBV12-4*01     | gattctcagtaagatgctaatgcatatttccactctgaagatccagcctcagaaccagggactcagctgtgtacttctgtgccagcagttatg          |
| TRBV12-5*01     | gattctcagcagagatgctgatgcaactttagcactctgaagatccagcctcagaaccagggactcagctgtgtattttgtgctagtggttgg          |
| TRBV12-2*01     | gattctcagctgagaggcctgatggatcatttctactctgaagatccagcctgcagagcagggggactcggccgtgtatgtctgtccaagctgcttagc    |
| TRBV6-1*01      | gctacaatgtctccagatataaacacagggatttctgctcaggctggagtcggctgctcctcccagacatctgtacttctgtgccagcagtgaaagc      |
| TRBV7-4*01      | ggttctctgcagagaggcctgagagatccgtctcactctgaagatccagcgcacacagcagggggactcagctgtgtatctctgtgccagcagcttagc    |
| TRBV7-5*01      | tcaattctccacagagaggctgaggatcttctccactgaagatccagcgcacacagcagcaaggggactcggctgtgtatctctgtgccagaagcttag    |
| TRAV20*01       | aaagaaaggctaaaagccattaaacaaagaagaaagcttctgcacatcacagccctaaactgaagactcagccattatctctgtctgtgcagg          |
| TRBV11-1*01     | gatttctgcagagaggctcaaggagtagactcactctcaagatccagcctgcagagcttggggactcggccatgtatctctgtgccagcagcttagc      |

| Gene            | 120bp capture probe sequence                                                                        |
|-----------------|-----------------------------------------------------------------------------------------------------|
| TRAV15*01       | acatTTTaaagaagcgctTggaaaagagaagtttatagtgttttgaatatgctggctctcatcctggagattcaggcacctactctgtgctttgagg   |
| TRAV7*01        | aaaggaagactaaatgctacattactgaagaatggaagcagctgttacattacagccgtgcagcctgaagattcagccacctattctgtgctgtagatg |
| TRAV16*01       | gcttcaactgctgaccttaacaaaggcgagacatcttccacctgaagaaccattgtcaagaggaagactcagccatgtattactgtgctcaagtgg    |
| TRAV6*01        | agactgaaggtcacctttgataccaccttaaacagagttgtttcatatcacagcctcccagcctgcagactcagctacctctgtgctctagaca      |
| TRBV19*01       | ggtacagcgtctctgggagaagaaggaatccttctcactgtgacatcggccaaaagaaccgcagacttctatctctgtgccatgtagataga        |
| TRAV14/DV4*02   | actcattgaatttcagaaggcaagaaatccccaacctgtcatctccgcttcacaactgggggactcagcaatgtatttctgtgcaatgagagaggg    |
| TRAV9-1*01      | gTTTTgaagccatgtactcgtaaagaaaccactcttccactTggagaagactcagttcaagagtgcagactccgtgtgtacttctgtgctgtgagtg   |
| TRAV9-2*01      | gTTTTgaagccataccgtaaagaaaccactcttccactTggagaaggtcagttcaagagtgcagactcagcggtgtacttctgtgctgtgagtg      |
| TRAV1-1*01      | gTTTTcttacccttagtcgctgtgatgtattggtacctctctacaggagctccagatgaaagactctgccttactctgtgcgtgtgagaga         |
| TRAV38-2/DV8*01 | ttctctggaacttcagaagcagccaaatcctcagctcaagatcgcagactcacagctgggggatcccgatgtatttctgtgcttattagagcg       |
| TRAV19*01       | attcttggaaacttcagaatccaccagttcctcaactccacctcacagcctcaagctgtggactcagcagtatacttctgtgctgtgagtgaggc     |
| TRAV30*01       | aaaatatctgcttcatTTaatgaaaaaagcagcaaacctcctgtacctacggcctcccagctcagttactcaggaacctactctgtcggcacagaga   |
| TRGV7*01        | agtattttactatgcaagcatgaggaggagctggaaattgatactgcaaaatctaattgaaaatgattctggatctattactgtccacctgggacagg  |
| TRGV1*01        | aaagtatgactggaagcacaagggaactTggaattgagactgcaaaatctaataaaaatgattctgggtcttactgtgccacctgggacagg        |
| TRGV3*01        | gtattatactcatacaccaggagggtggagctggatattgatactcgaatctaattgaaaatgattctgggtcttactgtgccacctgggacagg     |
| TRGV5*01        | gtattatactcatacaccaggagggtggagctggatattgatactcgaatctaattgaaaatgattctgggtcttactgtgccacctgggacagg     |
| TRGV8*01        | gtatcactatgcaagcacagggaagacctaaattatactggaaaatctaattgaaactgactctgggtcttactgtgccacctgggatagg         |
| TRGV4*01        | gtatgatacttatggaagcacaaggaagaactTgagaatgatactgcaaaatcttattgaaaatgactctggagtcttactgtgccacctgggatggg  |
| TRGV2*01        | gtattatactacgcaagcacaaggaacaactTgagattgatactcgaatctaattgaaaatgactctgggtcttactgtgccacctgggacggg      |
| TRGV5P*02       | gtattatactcatacaccaggagggtggagctggaattgagactgcaaaatctaattgaaaatgattctgggtcttactgtgccacctgggacagg    |
| TRAV21*01       | aagacttaatgcctcgtggataaatcatcaggagctagctattatactgcaagcttctcagcctggtgactcagccacctctctgtgctgtgagg     |
| TRBV29/OR9-2*01 | acaagttccatcagccgccccaaactaacttctcaactctgactgtgagcaacaggagactgaagacagcagcatatactctgcagcgttgaaga     |
| TRAV37*01       | agattcacagccaggcttaaaaaaggagaccagcacatttccctgcacatacaggattcccagctccatgactcaaccacattctctgcgcaagca    |
| TRBV21/OR9-2*01 | gattttcagccaatgccccaaactcacctgtacctggagatccagtcacggagtcaggagacacagcagcgtatttctgtccaacagcaaagc       |
| TRBV21-1*01     | gatttttagccaatgctcaaaaactcatctgtacctggagatccagtcacggagtcaggggacacagcactgtatttctgtgccagcagcaaagc     |
| TRAV8-6*01      | gTTTTgaggctgaatttaacaagagtcaaaactcttccactTgaggaaacctcagtcataaagcagcacggctgagtacttctgtgctgtgagtg     |
| TRAV8-3*01      | gctttgaggctgaatttaagaggagtcaactcttctaactTgaggaaacctctgtgcatggagtgatgctgctgagtacttctgtgctgtgggtgc    |
| TRBV29-1*01     | acaagttccatcagccgccccaaactaacttctcaactctgactgtgagcaatgagccctgaagacagcagcatatactctgcagcgttgaaga      |
| TRBV25/OR9-2*01 | agtcaacagctcagaataaggacggagcatttccctgacctggagctgcccagccctcacatacctctcagtaacctgtgccagcagtgaaata      |
| TRBV25-1*01     | agtcaacagctcagaataaggacggagcatttccctgacctggagctgcccagccctcacatacctctcagtaacctgtgccagcagtgaaata      |
| TRAV35*01       | aagactgactgctcagtttgataaccagaaggacagcttctgaatactcagatccatactagtgatgtaggcatctactctgtgctgggacag       |
| TRAV25*01       | gaaaagactgacatttcagtttgagaagcaaaaaagaacagctccctgcacatcacagccaccagactacagatgtagaacctactctgtgcaggg    |
| TRAV12-2*01     | aggtttacagcacagctcaataaagccagccagatgtttctctgctcatcagagactcccagcccagtgattcagccacctactctgtccgtgaaca   |
| TRAV12-1*01     | aggtttacagcacagctcaatagaccagccagatatttccctgctcatcagagactccaagctcagtgattcagccacctactctgtgtggtaaca    |
| TRAV12-3*01     | aggtttacagcacagctcgaataatccagcaagatatactctgttcatcagagactcacagcccagtgattcagccacctactctgtgcaatgagcg   |
| TRAV23/DV6*01   | agattcacaatctcctcaataaaagtccaagcagttctcattgcatatcattgattcccagcctggagactcagccacctactctgtgcagcaagca   |
| TRAV22*01       | agattaagccagcagctgctctacggaagcgtacagcttattgtacatttctctccagaccagactcagcgctttatttctgtgctgtggagc       |
| TRAV41*01       | aagattaattgccacaataaacatacaggaagcagcctcctgcacatcacagcctccatcccagagactctgcctgtacatctgtgctgtcaga      |
| TRAV39*01       | cgattaatggcctcactgataccaagcccctcagcacctccacatcacagctgcggtgcatgacctctgtgccactactctgtgcctgtggaca      |
| TRAV36/DV7*01   | agactaagtagcatattagataagaagaactTccagatcctgcaatcacagccaccagaccggagactcggccatctactctgtgctgtggagg      |
| TRAV29/DV5*01   | agattcactgtctttaaacaaggtccaagcactctctgcacattgtccctcccagcctggagactctcagtgacttctgtgcagcaagcg          |
| TRAV27*01       | aagagactaacctttagttggtgatgcaagaaggacagttctctccatcactgcagcccagcctggtgatacaggcctctactctgtgcaggag      |

| Gene            | 120bp capture probe sequence                                                                        |
|-----------------|-----------------------------------------------------------------------------------------------------|
| TRBV6-4*01      | gttatagtgctccagagcaaacacagatgattccccctcactggcgtctgtgtaccctctcagacatctgtgtacttctgtgccagcagtgactc     |
| TRBV10-1*01     | gctacagtgctctagatcaaacacagaggacctccccctcactctggagctgtctgcctctcccagacatctgtatattctgcgccagcagtgagtc   |
| TRBV10-2*01     | gctatgtgtctccagatccaagacagagaattccccctcactctggagctcagctaccctcccagacatctgtgtatttctgcgccagcagtgagtc   |
| TRBV6-2*01      | gctacaatgtctccagattaaaaaacagaatttctctgtgggggtggagtcggctctccctcccaaacatctgtgtacttctgtgccagcagttactc  |
| TRBV10-3*01     | gctatagtgctctagatcaaacacagaggatttctctcactctggagctccgtaccagctcccagacatctgtgtacttctgtgccatcagtgagtc   |
| TRAV24*01       | ggacgaataagtgccactcttaataccaaggagggttacagctatttgcacatcaaggatcccagcctgaagactcagccacatactctgtgcccttta |
| TRBV14*01       | gattcttagctgaaaggactggaggagctatttactctgaaggctcagcctgcagaactggaggattctggagtttatttctgtgccagcagccaaga  |
| TRBV24-1*01     | atacagtgctctgcagggcacaggctaaattctcctgtccctagagctgtccatcccaaccagacagctcttacttctgtgccaccagtgatttg     |
| TRBV24/OR9-2*03 | agtgtctctgcaggaacaggctaaatttctcctgtccctagagcctgccaccccaaccagacagcttctagtttacttctgtgccaccagtgattt    |
| TRAV8-2*01      | gttttgaggctgaatttaagaagagtgaaacctctccactgcagaaacctcagcccatatgagcgcagcggctgagctacttctgtgtgtgagtgga   |
| TRAV8-4*01      | gttttgaggctgaatttaagaagagtgaaacctctccactgcagaaacctcagcccatatgagcgcagcggctgagctacttctgtgtgtgagtgga   |
| TRBV22/OR9-2*01 | ggctacgggtctcccagaggagaaggggcttttctctcatggtgaagctggccacaccagccaacagctctgtacttctgtcctggagtgac        |
| TRAV26-2*01     | ggcctctctggcaatcgtgaagacagaaagtcacttctgtcctgcacctgtcacttgcagagatgctgtgttactactgcatcctgcagagac       |
| TRBV11-2*01     | gatttctgcagagaggctcaaggagtagactcactctcaagatccagcctgcaaagcttgaggactcggcctgtatctctgtgccagcagcttaga    |
| TRBV11-3*01     | gatttctgcagagaggctcaaggagtagactcactctcaagatccagcctgcagagcttggggactcggcctgtatctctgtgccagcagcttaga    |
| TRAV8-1*01      | gctttgaggctgaattataaagagtaaattctcttaatctgaggaacctctgtgcagtgaggagtgacacagctgagctacttctgtccgtgaatgc   |
| TRBV7-5*02      | caattctccacagagaggtctgaggatcttctccactgaagatccagcgcacagagcaagggcgactcggctgtatctctgtgtcagaagcttagc    |
| TRBV7-6*01      | ggttctctgcagagaggcctgaggatcctctcactctgcagatccagcgcacagagcagcgggactcggcctgtatctctgtgccagcagcttagc    |
| TRGV11*02       | gataagtaaaatgctcacacttccacttccactttgaaaaaaagtcttagagaagaagatgagggtgtaccactgtcctgtgctgattaggcac      |
| TRAV17*01       | agattaagagtcacgctgacactccaagaaaagcagttctgtgtgatcagcgttcccgggcagcagacactcttctacttctgtgtacggagc       |
| TRBV27*01       | ggtacaaaatctctgaaaagagaagaggaattccccctgatcctggagctgccagcccccaaccagacctctgtacttctgtgccagcagttatc     |
| TRDV1*01        | attctgtcaactcaagaaagcagcgaatcctctgccttaaccattcagccttacagctagaagattcagcaaaagcttttctgtcttgggaaact     |
| TRBV18*01       | gatttctgtgaattccaagaggggcccagcatcctgaggatccagcaggtagtcgaggagattggcagcttatttctgtgccagctaccacc        |
| TRAV5*01        | agactcactgttctattgaataaaaaggataaacatctgtctctgcgacttcagacacccagactggggactcagctatctacttctgtgcagagagta |
| TRAV13-2*01     | agagtaccgttttatgataaagacagtgaaacatctctctgcaaatgacagctactcaacctggagactcagctgtctactttgtgcagagaata     |
| TRDV2*03        | ttccaaggtagcattgatattgcaagaaactggctgacttaagatactgacccatcagagagatgaagggtcttactactgtcctgtgacacc       |
| TRAV1-2*01      | gttttcttctcttagctcgttctaaaggttacagttacctctttgaaaggagctccagatgaaagactctcctcttactctgtgtgtgagaga       |
| TRDV3*01        | gacggtttctgtgaaacacattctgaccgaaagccttctcacttggtgatctctccagtaaggactgaagacagtgccacttactactgtgccttag   |
| TRAV31*01       | tattctgtgagctccagaaaaaactaaaactattcagcttatcatatcatcatcacagccagaagacctgcaacatatttctgtgtctcaaagagcc   |
| TRAV10*01       | agatatacagcaactctggatgcagacacaaagcaaacctctctgcacatcacagcctcccagctcagcagctcctacatctgtgtggtgagcg      |
| TRAV28*01       | gaagactaaaaatccgagctcaaagctgaggaaacttatggccactatacatcagattcccagctgaggactcagctatttacttctgtgtgtgggga  |
| TRAV40*01       | aaaactcggaggcggaaatataaagacaaaaactccccattgtgaaatattcagtcaggtatcagactcagcctgtactactgtctctgggaga      |
| TRGV6*02        | gcatgatacttatggaagtagaaggataagctggaaattatacctcaaaaactaaatgaaaatcctctggggcttactactgtgccacctgagcagg   |
| TRAV18*01       | gtttccaggcagctctcaagagtgacagttctccactggagaagcctcgggtgagctgtcggactgtccgtgtactactgtcgtctgagaga        |
| TRBV26*01       | ggtatcatgttcttgaatactatagcatcttccccctgacctgaagtctgccagaccaaccagacatctgtgtatctatgccagcagttcatc       |
| TRBV8-2*01      | agagggtactgtgttcttgaacaagcctgagcattccccaatcctggcatccaccagcaccagcctatctgtaccactgtggcagcacatc         |
| TRGVA*01        | agataaaatcatagccaaggatggcagcagctctatctggcagctactgaagttggagacaggatcaggggatgaactactgcacaacctgggcccctg |
| TRAV4*01        | gcctcctgtttatcctcggcagaaagctcagcactctgagcctccccgggtttcctgagcagactcgtgtgtactactgtcctgtgggtgaca       |
| TRAV8-7*01      | aggctgaatttaagaagagcgaacctctctactgaggaaacctcaacctgtgagtgatgctgtgagctacttctgtgtgtgggtgacaggag        |
| TRAV13-1*01     | cgaattgtgttactgaacaagacagccaacatttctcctgcacatcacagagaccaacctgaagactcggctgtacttctgtgcagcaagta        |
| TRBV8*01        | gactctgagacctctgcagcagcctatcagtgacccacatctctgtgagcggatgacaacccccagggtgaagcgacctaacctatgagcc         |
| TRAV8-5*01      | tggacactatcacttcccaatcaatccccctgtgatttctatgctgtcttactttaaactcttaactctgtcagctgaggaggatgtatgtacc      |

| Gene            | 120bp capture probe sequence                                                                            |
|-----------------|---------------------------------------------------------------------------------------------------------|
| TRBV16*02       | gattttcagctaagtgcctccaaattcacctctgaccttgagatccaggctacgaagcttgaggattcagcagtgatTTTTGTGCCAGCAGCCAATC       |
| TRBV26/OR9-2*02 | ggtatcatgtttctttaaatactatagcatctttctcctgacctgaagctgctagcaccaaccagacatgtgtgtatctctgcccagcagttcatc        |
| TRBV7-3*03      | ggttctttgagtcaggcctgaggatccgtctctactctgaagatccagcgcacagagcagggggactcagccgctatctcctgcccagcagcttaac       |
| TRBV7-9*03      | tgatcggttctctcagagaggcctaaggatctttccacctggagatccagcgcacagagcagggggactcggccatgtatctctgtccagcagc          |
| TRBV9*02        | cgattctccgcacaacagttccctgactgactctgactctgaaactaaactgagctctctggagctgggggactcagctttgtatttctgtgccagcagctag |
| TRBV29/OR9-2*02 | acaagttcccatcagccgcccacaactaactctcaactctgactgtgagcaacaggagacctgaagacagcagcatatactctgcagcgttgaaga        |
| TRAV8-6*02      | gtttgaggctgaatttaacaagagtcaaaactctccacttgaggaaacctcagtcataataagcgcacggctgagctactctgtctgtgagtgga         |
| TRBV6-4*02      | gttatagtgctccagagcaaacacagatgattccccctcagctggcgtctgtctgacctctcagacatctgtgacttctgtccagcagtgactc          |
| TRBV10-1*02     | agatggctacagtgctctagatcaaacacagaggacctccccctcactctggagctgctgctctccccaagacatctgtatattctgcgccagcagct      |
| TRBV6-3*01      | gctacaatgtctccagattaaaaaacagaatttctgctggggtggagctggctgctctccccaacatctgtgacttctgtgccagcagttactc          |
| TRAJ1*01        | aatagagacacggggcatgggtatgaaagtattactcccagttgcaattggcaaaaggaaccagagttccacttccccgtactctgccatgccca         |
| TRAJ10*01       | gaggcatcaaacctgtgatactcagggagggaaaacaactcaccttgggacaggcactcagtaaaagtggaaactcagtaagatgagattctat          |
| TRAJ11*01       | tatggggatttctatagtgtaattcaggatacagcacctcaccttgggaaggggactatgcttctagctctccaggtacatgttaccatccc            |
| TRAJ12*01       | actgactaagaacactgtgggatggatagcagctataaattgactctgggagtgaggaccagactgctggcagccctgtaagtaagggtcagagag        |
| TRAJ13*01       | aaggcaggcattacagtgtaattctgggggtaccagaaagttaccttggaaattggaacaaagctccaagtcatccaagtgagccaatttctatg         |
| TRAJ13*02       | aaaggcaggcattacagtgtaattctgggggtaccagaaagttaccttggaaactggaacaaagctccaagtcatccaagtgagccaatttctat         |
| TRAJ14*01       | tttgcaggcagcacagctgtgatttatagcacattcatcttgggagtgggacaagattatcagtaaaacctgtaagtaggcaatattgctactaaa        |
| TRAJ15*01       | cagggcctatttactgtgccaaccaggcaggaactgctctgacttgggaagggaaacccttatcagtgagttccagtaagctactgataattatt         |
| TRAJ15*02       | cagggcctatttactgtgccaaccaggcaggaactgctctgacttgggaagggaaacccttatcagtgagttccagtaagctactgataattatt         |
| TRAJ16*01       | tggtacaatagatcactgtgggttttcagatggccagaagctgctcttggcaaggggaaacctgttaaagggtgacttaagtaattattactaatga       |
| TRAJ17*01       | cctgtggttttctggccttaaatcattgtgtgacaaagctgaggcaacaagtaacttggaggaggaaccagggtcagttaaaccaagtga              |
| TRAJ18*01       | aggggaccagcattgtccgacagaggctcaacctggggaggctacttggaaaggaactcagttgactgtctgctgctggtgagtgagctgcttct         |
| TRAJ19*01       | ttttcagaggacagatgtggctatcaaagatttacaatttcccttggaaagggatccaaacataatgtcactccaagtaagtgagcagcctttgt         |
| TRAJ2*01        | tggtgtcacctcaggtatgaatactggaggaacaattgataaacacatttgggaagggaccatgtattcattatctgtgagctatcccagggtg          |
| TRAJ20*01       | tgtaggcacctgcactgtgttctaacgactacaagctcagcttggagccggaaaccagtaactgtaagagcaagtaagtaagaaagaaaagttcca        |
| TRAJ21*01       | tgtaatgccaataaacatggtgtacaactcaacaaatttacttggatctgggaccaaactcaatgtaaaaccaagtaagttatagttgcctagaaga       |
| TRAJ22*01       | gttgagcaaatcatagtttctctggtctgcaaggcaactgaccttggactctggacacaattgactgtttacctgtaggctcctcaattaaa            |
| TRAJ23*01       | aggatatgtaacagatgtgattataaccaggaggaaagcttactctggacagggaaagggttatctgtgaaaccagtaagtaaaaattgtatc           |
| TRAJ23*02       | gactggatgtttttgacaggatgttaacacagctgtgattataaccaggaggaaagcttactctggacagggaaagggttatctgtgaaaccaca         |
| TRAJ24*01       | gaggtgtttgtcacagtgtaactgacagctgggggaaatcgagttggagcagggaccagggtgtggtcaccaggtagccattctggagc               |
| TRAJ24*02       | gaggtgtttgtcacagtgtaactgacagctgggggaaatcgagttggagcagggaccagggtgtggtcaccaggtagccattctggagc               |
| TRAJ25*01       | atgctgagataatcactatgcagaaggacaaggctctctcttacttcttgggaaggggacaaggctctgtcaagccaagtaagtgacataattat         |
| TRAJ26*01       | ctgagcccagaacactgtgggataaactatggtcagaatttcttcttgggtcccggaaccagattgtcctgctgtaagtaacagtttaagtgag          |
| TRAJ27*01       | caatagcactaaagactgtgtaaccaatgagcgaatcaaccttggggatgggactcagctcactgtgaagccaagtaagttgttctcttctg            |
| TRAJ28*01       | agaaaggaaactctgtcactctgggctgggagttaccaactcacttctgggaaggggaccaaactctcgtcacaagtaagttcttcttctg             |
| TRAJ29*01       | ttatggaggaaactcactgtgggaattcaggaacacaccttcttcttggaaagggcacaagacttctgtgattgcaagtaagttctagccatcc          |
| TRAJ3*01        | aaagaccttaccacagtggggtacagcagtgctccaagataatcttggatcagggaccagactcagctccggcaagtaagtagaatgaagcagg          |
| TRAJ30*01       | gttatggtcccaatcacagtgtaaacagatgacaagatcatcttggaaaagggacacgacttcatatctcccagtaagtgctttatgtgatt            |
| TRAJ31*01       | agtaaaggcaggaagtctgtggaataacaatccagactcatgttggagatggaactcagctggtggaagcccagtaagtgccatgtttattga           |
| TRAJ32*01       | ggctctgaaggactgtgaaattatggcgtgctcaaaaagctcatcttggaaactggcactctgctgtccagcaagtaagtaagtagtgga              |
| TRAJ32*02       | gtgattcagccactcctctgtgccagtggtggtgctcaaaaagctcatcttggaaactggcactctgctgtccagcaaatatccagaacct             |

| Gene       | 120bp capture probe sequence                                                                          |
|------------|-------------------------------------------------------------------------------------------------------|
| TRAJ33*01  | gtaaaggttttgtctgtgtggatagcaactatcagttaatctggggcgctgggaccaagctaattataagccaggtaagtctcagagatgtgactg      |
| TRAJ34*01  | aggtttttagatctcagatcactgtgtcttataaccgcaagctcatctttgggactgggaccagattacaagctttccaagt                    |
| TRAJ35*01  | taaaagaatgagccattgtggataggctttgggaatgtctgctcattgctgggctccggcactcaagtgtttttaccacgtaagtatacttttctcatt   |
| TRAJ36*01  | tactgggcagaaactgtgtcaaactggggcaacaactcttctttgggactggaacgagactcaccgttattccctgtaagtcttacctcttgaca       |
| TRAJ37*01  | aaagtacagcattagagtgtgctctggcaacacaggcaaaactaatctttgggcaagggacaacttacaagtaaaaccagtaggtctggatgttcca     |
| TRAJ37*02  | ctcagcgtgtactctgtgtctctatggctctagcaacacaggcaaaactaatctttgggcaagggacaacttacaagtaaaaccagataccgaac       |
| TRAJ38*01  | aaagcttctatgactgttaatctggcaacaacgtaagctgatttggggattgggaacaagcctggcagtaaatccgagtgagcttctgtgtaact       |
| TRAJ39*01  | cagccgaagatcactgtgtgaataataatgcaaggcaacatgctcacctttggagggggaacaaggttaattggtcaaacccctgagatctctgctgaat  |
| TRAJ4*01   | aagcaccatctgattgtgttttctggctgcaataagctgattttggagcaggaccaggtggctgtacccatgtgagtagatgacctgcaag           |
| TRAJ40*01  | tatgttggttatgtagagacacataaactgtgactacctcaggaaacctacaaatacatctttggaacaggcaccaggctgaagtttagcaagt        |
| TRAJ41*01  | ttagggagaacgactgtggaactcaaattccgggtatgactcaactcggcaaggcactcgtgttggctcacaccctgagtttttgggtttac          |
| TRAJ42*01  | agccccataggactgtgtaattatggaggaagccaaggaaatctcatctttggaaggcactaaactctgttaaccaagtaagtgttggggattc        |
| TRAJ43*01  | ttgttagagcatgtattactgtgacaataacaatgacatgctgctttggagcaggaccagactgacagtaaaaccaagtaagttgggggaatgggtcaat  |
| TRAJ44*01  | aggtttctgtatgaagcatctcagtgtaataaccggcactgccaagtaaaactcactttgggactggaacaagactcaggtcacgctcgtt           |
| TRAJ45*01  | agggttggcccagagtgtgtattcaggaggaggtgctgacggactcaccttggcaagggactcatatcatccagccctgtaagtcttttgcctg        |
| TRAJ46*01  | aagctgctgacagccgtgagaagaaaagcagcggagacaagctgactttgggaccgggactcgttagcagtaggcccagtaagtctgagcagaaaagt    |
| TRAJ47*01  | gtagaggagttgacgctgtgtggaatattggaacaaactgcttctggcgaggaaaccattctgagagtaagctctgtgagataaaacacactcaag      |
| TRAJ47*02  | gtgactattgcatctcggccctggaatattggaacaaactgcttctggcgaggaaaccattctgagagtaagctctatataccgaacccctgacctg     |
| TRAJ48*01  | atgacttagaacactgtgtacttaactttggaatgagaaatcaactttgggactggaacaagactcaccatcataccagtaagttcttcatcttgg      |
| TRAJ49*01  | tgttagcttctatcacagtggaacaccgtaaccagttctattttgggacagggacaagtttagcgtcattccaagtaagtaaaagaaatttcca        |
| TRAJ5*01   | tactgtatgtaccagggtgtggacacgggagagcacttactttgggagtggaacaagactccaagtgcaaccaagtaagtaaccaaacttaggc        |
| TRAJ50*01  | taaagtttggatggctgtgtgaaaacctctacgacaagtgatatttggccagggacaagcttatcagtcattccaagtaagttgcttccctggggtgct   |
| TRAJ51*01  | aaactccctgaagcaggagatgctgacagctatgagaagctgataatttggaaaggagacatgactaactgtaagccaagcaagctggaagaacctaa    |
| TRAJ52*01  | gcctccagtcagtgctaatgctggtgtagctatggaagctgacatttggacaaggaccatttactgtccatccaagtaagtgtaacaagac           |
| TRAJ53*01  | agccttctgtgctgtgagaatagtgaggtagcaactataaactgacatttggaaaaggaaactcttcaaccgtgaatccaagtaagtttagaggaggt    |
| TRAJ54*01  | taaagcctgctgtggtgtaattcaggagccagaagctggtatttggccaaggaaccaggctgactatcaaccaagtaagtagcaggggtgaag         |
| TRAJ55*01  | gaggatggatccctgttagtacaagctgctgtaattgctcttggggaaagggatgagtagcaaaaaataatccaagtaagtgaggggacaagaag       |
| TRAJ56*01  | agatcctctgtcattgtgtatactggagccaatagtaagctgacatttggaaaaggaataactctgagtgtagaccaggtatgtttatgaatgtt       |
| TRAJ57*01  | aagcagctgtgggggtgtaactcagggggactgtaaaagctgcttggaaaagggaacgaaactgacagtaaacctgtaagctgaaatgctt           |
| TRAJ58*01  | aagccccagcagctgttaagaaccagtgcttaggtgacctttgggaaaggaaacacagctcagctgaaatcctgtaagtgagggggagcatt          |
| TRAJ59*01  | atgtaaaggcagcagctcctgtggaaaggaaaggaaacaggaaatattacatttggaaatggggagcgaagtgagagtaagctatcttaaaacaaagggtg |
| TRAJ6*01   | caggttttatcaaaggctctcactgtgtgcatcaggaggaagctacatacctacatttggaaagggaaccagccttattgttcatcctgtaagt        |
| TRAJ60*01  | gtaaaggcctgggcaactatgtaagatcacctagatgctcaacttgggaagggactgagtttaattgtgagcctgggtgagtaacctcaactccagagg   |
| TRAJ61*01  | taaagtgcccactctgtgggtaccgggtaataggaactgacatttggagccaacactagaggaaatcatgaaactcagcaagtaattttggcagaa      |
| TRAJ7*01   | tgtaatacacttacacagtgactatgggaacaacagactcgttttgggaagggaaccaagtggtgctataccaagtaagtgagctgggatcctcc       |
| TRAJ8*01   | tacagagttatgtagagtgtaacacaggcttccagaaactgtatttggaaactggcaccgactctggtcagtcgaagtaagtaaatctgcagaaa       |
| TRAJ9*01   | cgagtgcaaatcactgtgggaaactggaggctcaaaactatctttggagcaggaaacagactatttggtaaaagcaagtaagttccatgaaataacc     |
| TRBJ1-1*01 | ttttcacctgaccctgtcactgtgtaactgaagcttctttggacaaggcaccagactcacagttgtagtaagacattttcaggttcttttgc          |
| TRBJ1-2*01 | ttttagagtgctatacttctatgtgtaactatggctacaccttgggtcggggaccaggttaaccgttaggtgagtaagctgggggtctctaggagggg    |
| TRBJ1-3*01 | tttgaagtgccctgggaggtgctctctggaacacatataatttggagagggaagttggctcactgttaggtgagtaagtaagctggagcagct         |
| TRBJ1-4*01 | ttcctccagcttctaatgttgcaactaatgaaactgtttttggcagtggaaccagctcctctcttgggtatgtaaagactctttcgggat            |
| TRBJ1-5*01 | tttccacactcatgatgactgtgtaacatcagcccagcatttgggtgagggactgactctccatcctagtaagttggcagaatcagggtggta         |

| Gene        | 120bp capture probe sequence                                                                        |
|-------------|-----------------------------------------------------------------------------------------------------|
| TRBJ1-6*01  | ttatctaagcctctgcagctgtgctcctataattcacccctccactttgggaatgggaccaggctcactgtgacaggtatggggctccactcttgactc |
| TRBJ1-6*02  | ttatctaagcctctgcagctgtgctcctataattcacccctccactttgggaacgggaccaggctcactgtgacaggtatggggctccactcttgactc |
| TRBJ2-1*01  | ttctgggcagcccctccactgtgctcctacaatgagcagttcttcgggcccaggacacggctcacctgtctaggtaagaaggggctccagggtggag   |
| TRBJ2-2*01  | tgcgccagggtcccagggtgtgctgaacaccgggagctgtttttggagaaggctctaggctgaccgtactggtaaggaggcggtgggctccgga      |
| TRBJ2-2P*01 | agctgccccactctgagagggctgtgctgagaggcgtctgggctgctgggaggactcctgttctgggtgctgggagagcgtgggctctcag         |
| TRBJ2-3*01  | ttttgctctgggctccaggctgtgagcacagatacgcagtatttggcccaggcaccggctgacagtgctcggttaagcggggctcccgtgaagccc    |
| TRBJ2-4*01  | ttctgtcccgtctcgggctgtgagcaaaaaacattcagtaacttcggcggcgggaccggctcctcagtgctgggtaagctggggcggcggggaccg    |
| TRBJ2-5*01  | ttttgtcgggctcggggcctgaccaaagagaccagtaacttcggcggcggcaccggctcctggtgctcggtgagcgggctgtggggcggcggg       |
| TRBJ2-6*01  | ttcggggaggtccccgggctgtgctctggggccaactcctgactttcgggcccggcagcaggctgaccgtgctgggtgagttttcggggaccaccgg   |
| TRBJ2-7*01  | tttgcagcgggggtcacctcctgctcctacgagcagtaacttcggcgggaccaggctcacggtcacaggtgagattcgggctctccccacctc       |
| TRBJ2-7*02  | tttgcagcggggatgcacctcctgctcctacgagcagtaacttcggcgggaccaggctcacggtcacaggtgagattcgggctctccccacctc      |
| TRDJ1*01    | ttttgaaactcctcaagtctgtgacaccgataaactcatctttggaaaaggaaccctgtgactgtggaaccaagtaagtaactcattttatctga     |
| TRDJ2*01    | ttttcgtaatgacgcctgtgtagtctttgacagcacaactcttctttgaaaggaacacaactcatcgtggaaccaggtaagttatgacttttact     |
| TRDJ3*01    | tgaggcactgtcataatgtgctcctgggaccccagacagatgttttcggaactggcatcaaactctcgtggagcccgtgagttgacttttctat      |
| TRDJ4*01    | atgagacatacaaaaagtaatgcccccagaccctgatctttggcaaggaacctatctggaggtaacaac                               |
| TRGJ1*01    | ttttgataggactgaatcactgtggaattattataagaaactctttggcagtggaacaacactggtgtcacaggttaagatcggagaatacaacatt   |
| TRGJ1*02    | tactgtgccttgtgggaggtgcttattataagaaactctttggcagtggaacaacactggtgtcacaggt                              |
| TRGJ2*01    | ttttgataggactgaatcactgtggaattattataagaaactctttggcagtggaacaacactggtgtcacaggttaagatcggagaatacaacatt   |
| TRGJP*01    | ataaaggcttctcaggtggtgggcaagagttgggcaaaaaaatcaaggtatttggcccggaaacaagcttaccattacaggttaagttttctaaatt   |
| TRGJP1*01   | gatttttctagaagcttagaccggtgtgataccactggttgggtcaagatatttctgaagggactaagctcatagtaactcacctggttaagt       |
| TRGJP2*01   | gatttttctagaagcttagaccaggtgtgataagtagtattggatcaagacgtttgcaaaagggactaggctcatagtaactcgcctggttaagt     |

Table 2: Sanger Sequencing Results

| Primer Combination  | Expected PCR Product Size When Present (bp) ‡ | PCR & Electrophoresis Result † | Reads with Detected Primer Combination | Total Number of Rearranged Reads Detected | Reads on Target | Total Number of Input Reads | PCR & Electrophoresis Result † | Reads with Detected Primer Combination | Total Number of Rearranged Reads Detected | Reads on Target | Total Number of Input Reads |                  |     |          |   |     |         |         |      |   |      |
|---------------------|-----------------------------------------------|--------------------------------|----------------------------------------|-------------------------------------------|-----------------|-----------------------------|--------------------------------|----------------------------------------|-------------------------------------------|-----------------|-----------------------------|------------------|-----|----------|---|-----|---------|---------|------|---|------|
|                     |                                               |                                |                                        |                                           |                 |                             |                                |                                        |                                           |                 |                             | A037             |     |          |   |     | L2D8    |         |      |   |      |
|                     |                                               |                                |                                        |                                           |                 |                             |                                |                                        |                                           |                 |                             | TRAV1-1 & TRAJ12 | 275 | Negative | 0 | 877 | 1155401 | 1370124 | Weak | 0 | 1384 |
| TRAV1-1 & TRAJ33    | 282                                           | Weak                           | 0                                      | 877                                       | 1155401         | 1370124                     | Weak                           | 0                                      | 1384                                      | 985843          | 1182258                     |                  |     |          |   |     |         |         |      |   |      |
| TRAV1-1 & TRAJ49    | 278                                           | Weak                           | 0                                      | 877                                       | 1155401         | 1370124                     | Weak                           | 0                                      | 1384                                      | 985843          | 1182258                     |                  |     |          |   |     |         |         |      |   |      |
| TRAV12-2 & TRAJ45   | 285                                           | Weak                           | 0                                      | 877                                       | 1155401         | 1370124                     | Negative                       | 0                                      | 1384                                      | 985843          | 1182258                     |                  |     |          |   |     |         |         |      |   |      |
| TRAV17 & TRAJ52     | 103                                           | Negative                       | 1                                      | 877                                       | 1155401         | 1370124                     | Positive                       | 425                                    | 1384                                      | 985843          | 1182258                     |                  |     |          |   |     |         |         |      |   |      |
| TRAV27 & TRAJ17     | 326                                           | Negative                       | 0                                      | 877                                       | 1155401         | 1370124                     | Negative                       | 0                                      | 1384                                      | 985843          | 1182258                     |                  |     |          |   |     |         |         |      |   |      |
| TRAV27 & TRAJ40     | 327                                           | Weak                           | 0                                      | 877                                       | 1155401         | 1370124                     | Weak                           | 0                                      | 1384                                      | 985843          | 1182258                     |                  |     |          |   |     |         |         |      |   |      |
| TRAV29/DV5 & TRAJ26 | 327                                           | Negative                       | 0                                      | 877                                       | 1155401         | 1370124                     | Negative                       | 0                                      | 1384                                      | 985843          | 1182258                     |                  |     |          |   |     |         |         |      |   |      |
| TRAV29/DV5 & TRAJ4  | 315                                           | Weak                           | 0                                      | 877                                       | 1155401         | 1370124                     | Negative                       | 0                                      | 1384                                      | 985843          | 1182258                     |                  |     |          |   |     |         |         |      |   |      |
| TRAV35 & TRAJ48     | 333                                           | Negative                       | 0                                      | 877                                       | 1155401         | 1370124                     | Positive                       | 316                                    | 1384                                      | 985843          | 1182258                     |                  |     |          |   |     |         |         |      |   |      |
| TRAV8-3 & TRAJ42    | 333                                           | Negative                       | 0                                      | 877                                       | 1155401         | 1370124                     | Negative                       | 0                                      | 1384                                      | 985843          | 1182258                     |                  |     |          |   |     |         |         |      |   |      |
| TRBV10-3 & TRBJ2-5  | 296                                           | Negative                       | 0                                      | 877                                       | 1155401         | 1370124                     | Weak                           | 0                                      | 1384                                      | 985843          | 1182258                     |                  |     |          |   |     |         |         |      |   |      |
| TRBV12-3 & TRBJ1-2  | 103                                           | Weak                           | 0                                      | 877                                       | 1155401         | 1370124                     | Negative                       | 0                                      | 1384                                      | 985843          | 1182258                     |                  |     |          |   |     |         |         |      |   |      |
| TRBV18 & TRBJ2-2    | 264                                           | Negative                       | 0                                      | 877                                       | 1155401         | 1370124                     | Negative                       | 0                                      | 1384                                      | 985843          | 1182258                     |                  |     |          |   |     |         |         |      |   |      |
| TRBV20-1 & TRBJ2-1  | 349                                           | Positive                       | 6                                      | 877                                       | 1155401         | 1370124                     | Negative                       | 0                                      | 1384                                      | 985843          | 1182258                     |                  |     |          |   |     |         |         |      |   |      |
| TRBV5-7 & TRBJ2-2   | 133                                           | Weak                           | 0                                      | 877                                       | 1155401         | 1370124                     | Negative                       | 0                                      | 1384                                      | 985843          | 1182258                     |                  |     |          |   |     |         |         |      |   |      |
| TRBV7-8 & TRBJ1-6   | 257                                           | Negative                       | 0                                      | 877                                       | 1155401         | 1370124                     | Positive                       | 315                                    | 1384                                      | 985843          | 1182258                     |                  |     |          |   |     |         |         |      |   |      |
| TRBV7-8 & TRBJ2-5   | 240                                           | Weak                           | 2                                      | 877                                       | 1155401         | 1370124                     | Negative                       | 0                                      | 1384                                      | 985843          | 1182258                     |                  |     |          |   |     |         |         |      |   |      |
| TRBV9 & TRBJ2-1     | 336                                           | Positive                       | 2                                      | 877                                       | 1155401         | 1370124                     | Weak                           | 0                                      | 1384                                      | 985843          | 1182258                     |                  |     |          |   |     |         |         |      |   |      |
| TRGV11 & TRGJ1      | 297                                           | Negative                       | 8                                      | 877                                       | 1155401         | 1370124                     | Negative                       | 0                                      | 1384                                      | 985843          | 1182258                     |                  |     |          |   |     |         |         |      |   |      |
| TRGV2 & TRGJP2      | 325                                           | Positive                       | 13                                     | 877                                       | 1155401         | 1370124                     | Negative                       | 0                                      | 1384                                      | 985843          | 1182258                     |                  |     |          |   |     |         |         |      |   |      |
| TRGV3 & TRGJ1       | 241                                           | Weak                           | 3                                      | 877                                       | 1155401         | 1370124                     | Positive                       | 0                                      | 1384                                      | 985843          | 1182258                     |                  |     |          |   |     |         |         |      |   |      |
| TRGV4 & TRGJ1       | 254                                           | Positive                       | 17                                     | 877                                       | 1155401         | 1370124                     | Positive                       | 161                                    | 1384                                      | 985843          | 1182258                     |                  |     |          |   |     |         |         |      |   |      |
| TRGV8 & TRGJ1       | 263                                           | Positive                       | 8                                      | 877                                       | 1155401         | 1370124                     | Negative                       | 4                                      | 1384                                      | 985843          | 1182258                     |                  |     |          |   |     |         |         |      |   |      |
| TRGV8 & TRGJP1      | 266                                           | Positive                       | 2                                      | 877                                       | 1155401         | 1370124                     | Negative                       | 0                                      | 1384                                      | 985843          | 1182258                     |                  |     |          |   |     |         |         |      |   |      |
| TRGV9 & TRGJ1       | 182                                           | Positive                       | 9                                      | 877                                       | 1155401         | 1370124                     | Negative                       | 0                                      | 1384                                      | 985843          | 1182258                     |                  |     |          |   |     |         |         |      |   |      |

| Primer Combination  | Expected PCR Product Size When Present (bp) ‡ | PCR & Electrophoresis Result † | Reads with Detected Primer Combination | Total Number of Rearranged Reads Detected | Reads on Target | Total Number of Input Reads | PCR & Electrophoresis Result † | Reads with Detected Primer Combination | Total Number of Rearranged Reads Detected | Reads on Target | Total Number of Input Reads |  |
|---------------------|-----------------------------------------------|--------------------------------|----------------------------------------|-------------------------------------------|-----------------|-----------------------------|--------------------------------|----------------------------------------|-------------------------------------------|-----------------|-----------------------------|--|
|                     |                                               | EZM                            |                                        |                                           |                 |                             |                                | TIL2                                   |                                           |                 |                             |  |
|                     |                                               |                                |                                        |                                           |                 |                             |                                |                                        |                                           |                 |                             |  |
| TRAV1-1 & TRAJ12    | 275                                           | Negative                       | 0                                      | 115                                       | 1377194         | 1595646                     | Negative                       | 0                                      | 2095                                      | 926207          | 1145281                     |  |
| TRAV1-1 & TRAJ33    | 282                                           | Negative                       | 0                                      | 115                                       | 1377194         | 1595646                     | Weak                           | 0                                      | 2095                                      | 926207          | 1145281                     |  |
| TRAV1-1 & TRAJ49    | 278                                           | Negative                       | 0                                      | 115                                       | 1377194         | 1595646                     | Weak                           | 0                                      | 2095                                      | 926207          | 1145281                     |  |
| TRAV12-2 & TRAJ45   | 285                                           | Negative                       | 1                                      | 115                                       | 1377194         | 1595646                     | Weak                           | 0                                      | 2095                                      | 926207          | 1145281                     |  |
| TRAV17 & TRAJ52     | 103                                           | Negative                       | 0                                      | 115                                       | 1377194         | 1595646                     | Negative                       | 0                                      | 2095                                      | 926207          | 1145281                     |  |
| TRAV27 & TRAJ17     | 326                                           | Negative                       | 0                                      | 115                                       | 1377194         | 1595646                     | Weak                           | 0                                      | 2095                                      | 926207          | 1145281                     |  |
| TRAV27 & TRAJ40     | 327                                           | Weak                           | 0                                      | 115                                       | 1377194         | 1595646                     | Weak                           | 0                                      | 2095                                      | 926207          | 1145281                     |  |
| TRAV29/DV5 & TRAJ26 | 327                                           | Negative                       | 0                                      | 115                                       | 1377194         | 1595646                     | Positive                       | 37                                     | 2095                                      | 926207          | 1145281                     |  |
| TRAV29/DV5 & TRAJ4  | 315                                           | Negative                       | 0                                      | 115                                       | 1377194         | 1595646                     | Negative                       | 0                                      | 2095                                      | 926207          | 1145281                     |  |
| TRAV35 & TRAJ48     | 333                                           | Negative                       | 0                                      | 115                                       | 1377194         | 1595646                     | Negative                       | 0                                      | 2095                                      | 926207          | 1145281                     |  |
| TRAV8-3 & TRAJ42    | 333                                           | Negative                       | 0                                      | 115                                       | 1377194         | 1595646                     | Negative                       | 0                                      | 2095                                      | 926207          | 1145281                     |  |
| TRBV10-3 & TRBJ2-5  | 296                                           | Negative                       | 0                                      | 115                                       | 1377194         | 1595646                     | Weak                           | 0                                      | 2095                                      | 926207          | 1145281                     |  |
| TRBV12-3 & TRBJ1-2  | 103                                           | Negative                       | 0                                      | 115                                       | 1377194         | 1595646                     | Negative                       | 0                                      | 2095                                      | 926207          | 1145281                     |  |
| TRBV18 & TRBJ2-2    | 264                                           | Negative                       | 0                                      | 115                                       | 1377194         | 1595646                     | Negative                       | 0                                      | 2095                                      | 926207          | 1145281                     |  |
| TRBV20-1 & TRBJ2-1  | 349                                           | Negative                       | 0                                      | 115                                       | 1377194         | 1595646                     | Weak                           | 8                                      | 2095                                      | 926207          | 1145281                     |  |
| TRBV5-7 & TRBJ2-2   | 133                                           | Weak                           | 0                                      | 115                                       | 1377194         | 1595646                     | Negative                       | 0                                      | 2095                                      | 926207          | 1145281                     |  |
| TRBV7-8 & TRBJ1-6   | 257                                           | Negative                       | 0                                      | 115                                       | 1377194         | 1595646                     | Negative                       | 0                                      | 2095                                      | 926207          | 1145281                     |  |
| TRBV7-8 & TRBJ2-5   | 240                                           | Negative                       | 0                                      | 115                                       | 1377194         | 1595646                     | Weak                           | 0                                      | 2095                                      | 926207          | 1145281                     |  |
| TRBV9 & TRBJ2-1     | 336                                           | Weak                           | 0                                      | 115                                       | 1377194         | 1595646                     | Weak                           | 6                                      | 2095                                      | 926207          | 1145281                     |  |
| TRGV11 & TRGJ1      | 297                                           | Negative                       | 0                                      | 115                                       | 1377194         | 1595646                     | Negative                       | 3                                      | 2095                                      | 926207          | 1145281                     |  |
| TRGV2 & TRGJP2      | 325                                           | Positive                       | 6                                      | 115                                       | 1377194         | 1595646                     | Positive                       | 10                                     | 2095                                      | 926207          | 1145281                     |  |
| TRGV3 & TRGJ1       | 241                                           | Positive                       | 0                                      | 115                                       | 1377194         | 1595646                     | Positive                       | 17                                     | 2095                                      | 926207          | 1145281                     |  |
| TRGV4 & TRGJ1       | 254                                           | Positive                       | 3                                      | 115                                       | 1377194         | 1595646                     | Positive                       | 56                                     | 2095                                      | 926207          | 1145281                     |  |
| TRGV8 & TRGJ1       | 263                                           | Positive                       | 4                                      | 115                                       | 1377194         | 1595646                     | Positive                       | 63                                     | 2095                                      | 926207          | 1145281                     |  |
| TRGV8 & TRGJP1      | 266                                           | Weak                           | 0                                      | 115                                       | 1377194         | 1595646                     | Positive                       | 0                                      | 2095                                      | 926207          | 1145281                     |  |
| TRGV9 & TRGJ1       | 182                                           | Weak                           | 0                                      | 115                                       | 1377194         | 1595646                     | Positive                       | 11                                     | 2095                                      | 926207          | 1145281                     |  |

| Primer Combination  | Expected PCR Product Size When Present (bp) % | PCR & Electrophoresis Result † | Reads with Detected Primer Combination | Total Number of Rearranged Reads Detected | Reads on Target | Total Number of Input Reads | PCR & Electrophoresis Result † | Reads with Detected Primer Combination | Total Number of Rearranged Reads Detected | Reads on Target | Total Number of Input Reads |  |
|---------------------|-----------------------------------------------|--------------------------------|----------------------------------------|-------------------------------------------|-----------------|-----------------------------|--------------------------------|----------------------------------------|-------------------------------------------|-----------------|-----------------------------|--|
|                     |                                               | OV7                            |                                        |                                           |                 |                             |                                | STIM1                                  |                                           |                 |                             |  |
|                     |                                               |                                |                                        |                                           |                 |                             |                                |                                        |                                           |                 |                             |  |
| TRAV1-1 & TRAJ12    | 275                                           | Negative                       | 4                                      | 2074                                      | 1379128         | 1675034                     | Negative                       | 0                                      | 2796                                      | 1066413         | 1315476                     |  |
| TRAV1-1 & TRAJ33    | 282                                           | Weak                           | 0                                      | 2074                                      | 1379128         | 1675034                     | Negative                       | 0                                      | 2796                                      | 1066413         | 1315476                     |  |
| TRAV1-1 & TRAJ49    | 278                                           | Weak                           | 0                                      | 2074                                      | 1379128         | 1675034                     | Negative                       | 0                                      | 2796                                      | 1066413         | 1315476                     |  |
| TRAV12-2 & TRAJ45   | 285                                           | Negative                       | 0                                      | 2074                                      | 1379128         | 1675034                     | Weak                           | 238                                    | 2796                                      | 1066413         | 1315476                     |  |
| TRAV17 & TRAJ52     | 103                                           | Weak                           | 0                                      | 2074                                      | 1379128         | 1675034                     | Negative                       | 0                                      | 2796                                      | 1066413         | 1315476                     |  |
| TRAV27 & TRAJ17     | 326                                           | Negative                       | 0                                      | 2074                                      | 1379128         | 1675034                     | Negative                       | 0                                      | 2796                                      | 1066413         | 1315476                     |  |
| TRAV27 & TRAJ40     | 327                                           | Negative                       | 0                                      | 2074                                      | 1379128         | 1675034                     | Weak                           | 0                                      | 2796                                      | 1066413         | 1315476                     |  |
| TRAV29/DV5 & TRAJ26 | 327                                           | Positive                       | 298                                    | 2074                                      | 1379128         | 1675034                     | Negative                       | 2                                      | 2796                                      | 1066413         | 1315476                     |  |
| TRAV29/DV5 & TRAJ4  | 315                                           | Negative                       | 0                                      | 2074                                      | 1379128         | 1675034                     | Negative                       | 0                                      | 2796                                      | 1066413         | 1315476                     |  |
| TRAV35 & TRAJ48     | 333                                           | Negative                       | 0                                      | 2074                                      | 1379128         | 1675034                     | Negative                       | 0                                      | 2796                                      | 1066413         | 1315476                     |  |
| TRAV8-3 & TRAJ42    | 333                                           | Negative                       | 0                                      | 2074                                      | 1379128         | 1675034                     | Weak                           | 185                                    | 2796                                      | 1066413         | 1315476                     |  |
| TRBV10-3 & TRBJ2-5  | 296                                           | Negative                       | 0                                      | 2074                                      | 1379128         | 1675034                     | Negative                       | 0                                      | 2796                                      | 1066413         | 1315476                     |  |
| TRBV12-3 & TRBJ1-2  | 103                                           | Weak                           | 0                                      | 2074                                      | 1379128         | 1675034                     | Negative                       | 0                                      | 2796                                      | 1066413         | 1315476                     |  |
| TRBV18 & TRBJ2-2    | 264                                           | Negative                       | 0                                      | 2074                                      | 1379128         | 1675034                     | Negative                       | 0                                      | 2796                                      | 1066413         | 1315476                     |  |
| TRBV20-1 & TRBJ2-1  | 349                                           | Negative                       | 1                                      | 2074                                      | 1379128         | 1675034                     | Negative                       | 0                                      | 2796                                      | 1066413         | 1315476                     |  |
| TRBV5-7 & TRBJ2-2   | 133                                           | Negative                       | 0                                      | 2074                                      | 1379128         | 1675034                     | Negative                       | 0                                      | 2796                                      | 1066413         | 1315476                     |  |
| TRBV7-8 & TRBJ1-6   | 257                                           | Negative                       | 0                                      | 2074                                      | 1379128         | 1675034                     | Negative                       | 0                                      | 2796                                      | 1066413         | 1315476                     |  |
| TRBV7-8 & TRBJ2-5   | 240                                           | Weak                           | 85                                     | 2074                                      | 1379128         | 1675034                     | Negative                       | 0                                      | 2796                                      | 1066413         | 1315476                     |  |
| TRBV9 & TRBJ2-1     | 336                                           | Positive                       | 0                                      | 2074                                      | 1379128         | 1675034                     | Weak                           | 0                                      | 2796                                      | 1066413         | 1315476                     |  |
| TRGV11 & TRGJ1      | 297                                           | Negative                       | 0                                      | 2074                                      | 1379128         | 1675034                     | Negative                       | 23                                     | 2796                                      | 1066413         | 1315476                     |  |
| TRGV2 & TRGJP2      | 325                                           | Weak                           | 0                                      | 2074                                      | 1379128         | 1675034                     | Positive                       | 11                                     | 2796                                      | 1066413         | 1315476                     |  |
| TRGV3 & TRGJ1       | 241                                           | Negative                       | 7                                      | 2074                                      | 1379128         | 1675034                     | Positive                       | 13                                     | 2796                                      | 1066413         | 1315476                     |  |
| TRGV4 & TRGJ1       | 254                                           | Weak                           | 5                                      | 2074                                      | 1379128         | 1675034                     | Positive                       | 40                                     | 2796                                      | 1066413         | 1315476                     |  |
| TRGV8 & TRGJ1       | 263                                           | Positive                       | 14                                     | 2074                                      | 1379128         | 1675034                     | Positive                       | 24                                     | 2796                                      | 1066413         | 1315476                     |  |
| TRGV8 & TRGJP1      | 266                                           | Positive                       | 197                                    | 2074                                      | 1379128         | 1675034                     | Negative                       | 0                                      | 2796                                      | 1066413         | 1315476                     |  |
| TRGV9 & TRGJ1       | 182                                           | Negative                       | 15                                     | 2074                                      | 1379128         | 1675034                     | Positive                       | 120                                    | 2796                                      | 1066413         | 1315476                     |  |

| Primer Combination  | Expected PCR Product Size When Present (bp) % | PCR & Electrophoresis Result † | Reads with Detected Primer Combination | Total Number of Rearranged Reads Detected | Reads on Target | Total Number of Input Reads | PCR & Electrophoresis Result † | Reads with Detected Primer Combination | Total Number of Rearranged Reads Detected | Reads on Target | Total Number of Input Reads |  |
|---------------------|-----------------------------------------------|--------------------------------|----------------------------------------|-------------------------------------------|-----------------|-----------------------------|--------------------------------|----------------------------------------|-------------------------------------------|-----------------|-----------------------------|--|
|                     |                                               | SE14-2005 (SUPT1)              |                                        |                                           |                 |                             |                                | SE14-2033 (Jurkat)                     |                                           |                 |                             |  |
|                     |                                               |                                |                                        |                                           |                 |                             |                                |                                        |                                           |                 |                             |  |
| TRAV1-1 & TRAJ12    | 275                                           | Positive                       | 460                                    | 2371                                      | 837044          | 1096080                     | Negative                       | 0                                      | 1554                                      | 817921          | 995632                      |  |
| TRAV1-1 & TRAJ33    | 282                                           | Negative                       | 0                                      | 2371                                      | 837044          | 1096080                     | Weak                           | 0                                      | 1554                                      | 817921          | 995632                      |  |
| TRAV1-1 & TRAJ49    | 278                                           | Weak                           | 0                                      | 2371                                      | 837044          | 1096080                     | Negative                       | 0                                      | 1554                                      | 817921          | 995632                      |  |
| TRAV12-2 & TRAJ45   | 285                                           | Negative                       | 0                                      | 2371                                      | 837044          | 1096080                     | Negative                       | 0                                      | 1554                                      | 817921          | 995632                      |  |
| TRAV17 & TRAJ52     | 103                                           | Negative                       | 0                                      | 2371                                      | 837044          | 1096080                     | Negative                       | 0                                      | 1554                                      | 817921          | 995632                      |  |
| TRAV27 & TRAJ17     | 326                                           | Negative                       | 0                                      | 2371                                      | 837044          | 1096080                     | Negative                       | 0                                      | 1554                                      | 817921          | 995632                      |  |
| TRAV27 & TRAJ40     | 327                                           | Weak                           | 0                                      | 2371                                      | 837044          | 1096080                     | Weak                           | 0                                      | 1554                                      | 817921          | 995632                      |  |
| TRAV29/DV5 & TRAJ26 | 327                                           | Weak                           | 0                                      | 2371                                      | 837044          | 1096080                     | Weak                           | 0                                      | 1554                                      | 817921          | 995632                      |  |
| TRAV29/DV5 & TRAJ4  | 315                                           | Weak                           | 0                                      | 2371                                      | 837044          | 1096080                     | Negative                       | 1                                      | 1554                                      | 817921          | 995632                      |  |
| TRAV35 & TRAJ48     | 333                                           | Negative                       | 0                                      | 2371                                      | 837044          | 1096080                     | Negative                       | 0                                      | 1554                                      | 817921          | 995632                      |  |
| TRAV8-3 & TRAJ42    | 333                                           | Negative                       | 0                                      | 2371                                      | 837044          | 1096080                     | Negative                       | 0                                      | 1554                                      | 817921          | 995632                      |  |
| TRBV10-3 & TRBJ2-5  | 296                                           | Negative                       | 0                                      | 2371                                      | 837044          | 1096080                     | Weak                           | 0                                      | 1554                                      | 817921          | 995632                      |  |
| TRBV12-3 & TRBJ1-2  | 103                                           | Weak                           | 0                                      | 2371                                      | 837044          | 1096080                     | Positive                       | 138                                    | 1554                                      | 817921          | 995632                      |  |
| TRBV18 & TRBJ2-2    | 264                                           | Negative                       | 0                                      | 2371                                      | 837044          | 1096080                     | Negative                       | 0                                      | 1554                                      | 817921          | 995632                      |  |
| TRBV20-1 & TRBJ2-1  | 349                                           | Negative                       | 0                                      | 2371                                      | 837044          | 1096080                     | Negative                       | 0                                      | 1554                                      | 817921          | 995632                      |  |
| TRBV5-7 & TRBJ2-2   | 133                                           | Weak                           | 0                                      | 2371                                      | 837044          | 1096080                     | Negative                       | 0                                      | 1554                                      | 817921          | 995632                      |  |
| TRBV7-8 & TRBJ1-6   | 257                                           | Negative                       | 0                                      | 2371                                      | 837044          | 1096080                     | Negative                       | 0                                      | 1554                                      | 817921          | 995632                      |  |
| TRBV7-8 & TRBJ2-5   | 240                                           | Negative                       | 0                                      | 2371                                      | 837044          | 1096080                     | Negative                       | 0                                      | 1554                                      | 817921          | 995632                      |  |
| TRBV9 & TRBJ2-1     | 336                                           | Positive                       | 538                                    | 2371                                      | 837044          | 1096080                     | Negative                       | 0                                      | 1554                                      | 817921          | 995632                      |  |
| TRGV11 & TRGJ1      | 297                                           | Negative                       | 0                                      | 2371                                      | 837044          | 1096080                     | Weak                           | 242                                    | 1554                                      | 817921          | 995632                      |  |
| TRGV2 & TRGJP2      | 325                                           | Weak                           | 0                                      | 2371                                      | 837044          | 1096080                     | Negative                       | 0                                      | 1554                                      | 817921          | 995632                      |  |
| TRGV3 & TRGJ1       | 241                                           | Positive                       | 22                                     | 2371                                      | 837044          | 1096080                     | Negative                       | 0                                      | 1554                                      | 817921          | 995632                      |  |
| TRGV4 & TRGJ1       | 254                                           | Positive                       | 25                                     | 2371                                      | 837044          | 1096080                     | Negative                       | 0                                      | 1554                                      | 817921          | 995632                      |  |
| TRGV8 & TRGJ1       | 263                                           | Negative                       | 0                                      | 2371                                      | 837044          | 1096080                     | Weak                           | 146                                    | 1554                                      | 817921          | 995632                      |  |
| TRGV8 & TRGJP1      | 266                                           | Negative                       | 0                                      | 2371                                      | 837044          | 1096080                     | Negative                       | 0                                      | 1554                                      | 817921          | 995632                      |  |
| TRGV9 & TRGJ1       | 182                                           | Weak                           | 0                                      | 2371                                      | 837044          | 1096080                     | Negative                       | 0                                      | 1554                                      | 817921          | 995632                      |  |

| Primer Combination  | Expected PCR Product Size When Present (bp) % | PCR & Electrophoresis Result † | Reads with Detected Primer Combination | Total Number of Rearranged Reads Detected | Reads on Target | Total Number of Input Reads | PCR & Electrophoresis Result † | Reads with Detected Primer Combination | Total Number of Rearranged Reads Detected | Reads on Target | Total Number of Input Reads |  |
|---------------------|-----------------------------------------------|--------------------------------|----------------------------------------|-------------------------------------------|-----------------|-----------------------------|--------------------------------|----------------------------------------|-------------------------------------------|-----------------|-----------------------------|--|
|                     |                                               | SE14-2034 (MOLT4)              |                                        |                                           |                 |                             |                                | SE14-2035 (CEM)                        |                                           |                 |                             |  |
|                     |                                               |                                |                                        |                                           |                 |                             |                                |                                        |                                           |                 |                             |  |
| TRAV1-1 & TRAJ12    | 275                                           | Negative                       | 0                                      | 1723                                      | 741549          | 906513                      | Negative                       | 0                                      | 1744                                      | 981779          | 1289677                     |  |
| TRAV1-1 & TRAJ33    | 282                                           | Positive                       | 347                                    | 1723                                      | 741549          | 906513                      | Weak                           | 0                                      | 1744                                      | 981779          | 1289677                     |  |
| TRAV1-1 & TRAJ49    | 278                                           | Negative                       | 0                                      | 1723                                      | 741549          | 906513                      | Negative                       | 0                                      | 1744                                      | 981779          | 1289677                     |  |
| TRAV12-2 & TRAJ45   | 285                                           | Negative                       | 0                                      | 1723                                      | 741549          | 906513                      | Negative                       | 0                                      | 1744                                      | 981779          | 1289677                     |  |
| TRAV17 & TRAJ52     | 103                                           | Negative                       | 0                                      | 1723                                      | 741549          | 906513                      | Positive                       | 0                                      | 1744                                      | 981779          | 1289677                     |  |
| TRAV27 & TRAJ17     | 326                                           | Negative                       | 0                                      | 1723                                      | 741549          | 906513                      | Negative                       | 0                                      | 1744                                      | 981779          | 1289677                     |  |
| TRAV27 & TRAJ40     | 327                                           | Negative                       | 0                                      | 1723                                      | 741549          | 906513                      | Positive                       | 506                                    | 1744                                      | 981779          | 1289677                     |  |
| TRAV29/DV5 & TRAJ26 | 327                                           | Negative                       | 0                                      | 1723                                      | 741549          | 906513                      | Negative                       | 0                                      | 1744                                      | 981779          | 1289677                     |  |
| TRAV29/DV5 & TRAJ4  | 315                                           | Negative                       | 0                                      | 1723                                      | 741549          | 906513                      | Positive                       | 751                                    | 1744                                      | 981779          | 1289677                     |  |
| TRAV35 & TRAJ48     | 333                                           | Negative                       | 0                                      | 1723                                      | 741549          | 906513                      | Negative                       | 0                                      | 1744                                      | 981779          | 1289677                     |  |
| TRAV8-3 & TRAJ42    | 333                                           | Negative                       | 0                                      | 1723                                      | 741549          | 906513                      | Weak                           | 0                                      | 1744                                      | 981779          | 1289677                     |  |
| TRBV10-3 & TRBJ2-5  | 296                                           | Positive                       | 379                                    | 1723                                      | 741549          | 906513                      | Negative                       | 0                                      | 1744                                      | 981779          | 1289677                     |  |
| TRBV12-3 & TRBJ1-2  | 103                                           | Negative                       | 0                                      | 1723                                      | 741549          | 906513                      | Negative                       | 0                                      | 1744                                      | 981779          | 1289677                     |  |
| TRBV18 & TRBJ2-2    | 264                                           | Negative                       | 0                                      | 1723                                      | 741549          | 906513                      | Negative                       | 0                                      | 1744                                      | 981779          | 1289677                     |  |
| TRBV20-1 & TRBJ2-1  | 349                                           | Positive                       | 551                                    | 1723                                      | 741549          | 906513                      | Negative                       | 0                                      | 1744                                      | 981779          | 1289677                     |  |
| TRBV5-7 & TRBJ2-2   | 133                                           | Negative                       | 0                                      | 1723                                      | 741549          | 906513                      | Weak                           | 0                                      | 1744                                      | 981779          | 1289677                     |  |
| TRBV7-8 & TRBJ1-6   | 257                                           | Negative                       | 0                                      | 1723                                      | 741549          | 906513                      | Negative                       | 0                                      | 1744                                      | 981779          | 1289677                     |  |
| TRBV7-8 & TRBJ2-5   | 240                                           | Negative                       | 0                                      | 1723                                      | 741549          | 906513                      | Negative                       | 0                                      | 1744                                      | 981779          | 1289677                     |  |
| TRBV9 & TRBJ2-1     | 336                                           | Negative                       | 0                                      | 1723                                      | 741549          | 906513                      | Positive                       | 1                                      | 1744                                      | 981779          | 1289677                     |  |
| TRGV11 & TRGJ1      | 297                                           | Negative                       | 0                                      | 1723                                      | 741549          | 906513                      | Weak                           | 0                                      | 1744                                      | 981779          | 1289677                     |  |
| TRGV2 & TRGJP2      | 325                                           | Positive                       | 275                                    | 1723                                      | 741549          | 906513                      | Weak                           | 0                                      | 1744                                      | 981779          | 1289677                     |  |
| TRGV3 & TRGJ1       | 241                                           | Negative                       | 0                                      | 1723                                      | 741549          | 906513                      | Positive                       | 222                                    | 1744                                      | 981779          | 1289677                     |  |
| TRGV4 & TRGJ1       | 254                                           | Negative                       | 0                                      | 1723                                      | 741549          | 906513                      | Positive                       | 0                                      | 1744                                      | 981779          | 1289677                     |  |
| TRGV8 & TRGJ1       | 263                                           | Negative                       | 0                                      | 1723                                      | 741549          | 906513                      | Negative                       | 0                                      | 1744                                      | 981779          | 1289677                     |  |
| TRGV8 & TRGJP1      | 266                                           | Negative                       | 0                                      | 1723                                      | 741549          | 906513                      | Negative                       | 0                                      | 1744                                      | 981779          | 1289677                     |  |
| TRGV9 & TRGJ1       | 182                                           | Negative                       | 0                                      | 1723                                      | 741549          | 906513                      | Weak                           | 0                                      | 1744                                      | 981779          | 1289677                     |  |

Cell colors correspond to band intensity (green: positive, yellow: weak, red: negative) and number of corresponding VJ counts for a given sample (orange: 0, light yellow: >0).

Table 3: PCR Validation Primer Sequences

| Gene       | Primer Sequence           |
|------------|---------------------------|
| TRAJ12     | ggtcccactcccgaagatca      |
| TRAJ17     | actagcacctgggtcctcc       |
| TRAJ26     | agggcagcacggacaatctg      |
| TRAJ33     | taattagcttgggtcccagcgcc   |
| TRAJ4      | gcctgggtccctgctccaaaa     |
| TRAJ40     | aaaaccttcagcctgggtgcc     |
| TRAJ42     | ttggtttaacagagagtttagtgcc |
| TRAJ45     | ttgccaaaggtgagtcctgc      |
| TRAJ48     | tgggtatgatggtagtcttgt     |
| TRAJ49     | tcaaacttgtccctgtcccaa     |
| TRAJ52     | ggacagtcaagatgggtccctgtc  |
| TRAV1-1    | aggagccattgtccagataaa     |
| TRAV12-2   | cagtgttccagaggagccattg    |
| TRAV17     | cgggcagcagacactgcttctt    |
| TRAV27     | cagctgctggagcagagcc       |
| TRAV29/DV5 | agcaaaattcaccatccctgagcg  |
| TRAV35     | cagctgaatcagagtcctcaatct  |
| TRAV8-3    | gcctgacatccacatcactg      |
| TRBJ1-2    | tccccgaaccgaaggtgtag      |
| TRBJ1-6    | cctgggtcccattcccaaagt     |
| TRBJ2-1    | acggtagcctgtctccc         |
| TRBJ2-2    | tacggtcagcctagagcctt      |
| TRBJ2-5    | cccgaagtactgggtctctt      |
| TRBV10-3   | acacaaggtcacagagacagg     |
| TRBV12-3   | gaagatccagccctcagaacc     |
| TRBV18     | tcatgtttactggatcggcag     |
| TRBV20-1   | tgtcgtctctcaacatccgagc    |
| TRBV5-7    | agctctgagctgaatgtgaacgcc  |
| TRBV7-8    | atccctttttggtagcaacag     |
| TRBV9      | cacacaaaccccaaagcacct     |
| TRGJ1 *    | ccagtgttgtccactgcc        |
| TRGJ2 *    | caagtgttgtccactgcca       |
| TRGJP1     | gagcttagtcccttcagc        |
| TRGJP2     | ggcgaagtactatgagcct       |
| TRGV11     | tgccacatatcttgggaaggc     |
| TRGV2      | atcaggcagactgggtcatc      |
| TRGV3      | actggtacctacaccaggagg     |
| TRGV4      | accggctacatccactggta      |
| TRGV8      | gtagaaaatgccgtctacac      |
| TRGV9      | cggcactgtcagaaaggaatc     |

**Table 4.1: Capture Sample Method Data**

| Sample                            | Sample        | Protocol Type      | Library Input (ng) |
|-----------------------------------|---------------|--------------------|--------------------|
| <b>A037 healthy reference</b>     |               |                    |                    |
| Sample_A037_PBMC_TCR_A_all        | A037_PBMC     | CapSeq_One-Step_V  | 100                |
| Sample_A037_PBMC_TCR_B_all        | A037_PBMC     | CapSeq_One-Step_V  | 200                |
| Sample_A037_PBMC_TCR_D_all        | A037_PBMC     | CapSeq_One-Step_V  | 600                |
| Sample_A037_PBMC_TCR_E_all        | A037_PBMC     | CapSeq_One-Step_V  | 800                |
| Sample_A037_PBMC_TCR_F_all        | A037_PBMC     | CapSeq_One-Step_V  | 1000               |
| Sample_A037_PBMC_TCR_G_all        | A037_PBMC     | CapSeq_One-Step_V  | 200                |
| Sample_A037_PBMC_TCR_H_all        | A037_PBMC     | CapSeq_One-Step_V  | 600                |
| Sample_A037_PBMC_TCR_J_all        | A037_PBMC     | CapSeq_One-Step_V  | 200                |
| Sample_A037_PBMC_TCR_K_all        | A037_PBMC     | CapSeq_One-Step_V  | 600                |
| Sample_A037_PBMC_TCR_L_all        | A037_PBMC     | CapSeq_One-Step_V  | 1000               |
| Sample_16_01_A037_PBMC_TCR_F_all  | A037_PBMC     | CapSeq_One-Step_V  | 500                |
| Sample_16_01_A037_PBMC_TCR_H_all  | A037_PBMC     | CapSeq_One-Step_V  | 250                |
| Sample_A037_S1_all                | A037_PBMC     | CapSeq_One-Step_VJ | 100                |
| Sample_A037_PBMC_1S_all           | A037_PBMC     | CapSeq_One-Step_VJ | 100                |
| Sample_16_11_A037_PBMC_TCR_VJ_all | A037_PBMC     | CapSeq_One-Step_VJ | 100                |
| Sample_A037_CD3_1S_all            | A037_CD3      | CapSeq_One-Step_VJ | 100                |
| <b>Cell lines and flow sorted</b> |               |                    |                    |
| M36_EZM                           | flow_sorted   | CapSeq_One-Step_VJ | 100                |
| M36_TIL2                          | flow_sorted   | CapSeq_One-Step_VJ | 100                |
| OV7-TIL2                          | flow_sorted   | CapSeq_One-Step_VJ | 100                |
| CEM                               | cell_line     | CapSeq_One-Step_VJ | 100                |
| Jurkat                            | cell_line     | CapSeq_One-Step_VJ | 100                |
| MOLT4                             | cell_line     | CapSeq_One-Step_VJ | 100                |
| SUPT1                             | cell_line     | CapSeq_One-Step_VJ | 100                |
| STIM1                             | flow_sorted   | CapSeq_One-Step_VJ | 100                |
| L2D8                              | flow_sorted   | CapSeq_One-Step_VJ | 100                |
| <b>Patient samples</b>            |               |                    |                    |
| TCL-001                           | patient_tumor | CapSeq_One-Step_VJ | 100                |
| TCL-002                           | patient_tumor | CapSeq_One-Step_VJ | 100                |
| TCL-003                           | patient_tumor | CapSeq_One-Step_VJ | 100                |
| TCL-004                           | patient_tumor | CapSeq_One-Step_VJ | 100                |
| TCL-005                           | patient_tumor | CapSeq_One-Step_VJ | 100                |
| TCL-006                           | patient_tumor | CapSeq_One-Step_VJ | 100                |
| TCL-007                           | patient_tumor | CapSeq_One-Step_VJ | 100                |
| TCL-008                           | patient_tumor | CapSeq_One-Step_VJ | 100                |
| TCL-009                           | patient_tumor | CapSeq_One-Step_VJ | 100                |
| TCL-010                           | patient_tumor | CapSeq_One-Step_VJ | 100                |
| TCL-011                           | patient_tumor | CapSeq_One-Step_VJ | 100                |
| TCL-012                           | patient_tumor | CapSeq_One-Step_VJ | 100                |
| TCL-013                           | patient_tumor | CapSeq_One-Step_VJ | 100                |
| TCL-014                           | patient_tumor | CapSeq_One-Step_VJ | 100                |
| TCL-015                           | patient_tumor | CapSeq_One-Step_VJ | 100                |
| TCL-016                           | patient_tumor | CapSeq_One-Step_VJ | 100                |
| TCL-017                           | patient_tumor | CapSeq_One-Step_VJ | 100                |
| TCL-018                           | patient_tumor | CapSeq_One-Step_VJ | 100                |
| TCL-019                           | patient_tumor | CapSeq_One-Step_VJ | 100                |
| TCL-020                           | patient_tumor | CapSeq_One-Step_VJ | 100                |
| TCL-021                           | patient_tumor | CapSeq_One-Step_VJ | 100                |
| TCL-022                           | patient_tumor | CapSeq_One-Step_VJ | 100                |
| TCL-023                           | patient_tumor | CapSeq_One-Step_VJ | 100                |
| TCL-024                           | patient_tumor | CapSeq_One-Step_VJ | 100                |
| TCL-025                           | patient_tumor | CapSeq_One-Step_VJ | 100                |
| TCL-026                           | patient_tumor | CapSeq_One-Step_VJ | 100                |
| TCL-027                           | patient_tumor | CapSeq_One-Step_VJ | 100                |
| TCL-028                           | patient_tumor | CapSeq_One-Step_VJ | 100                |
| TCL-029                           | patient_tumor | CapSeq_One-Step_VJ | 100                |
| TCL-030                           | patient_tumor | CapSeq_One-Step_VJ | 100                |
| TCL-031                           | patient_tumor | CapSeq_One-Step_VJ | 100                |
| TCL-032                           | patient_tumor | CapSeq_One-Step_VJ | 100                |
| TCL-033                           | patient_tumor | CapSeq_One-Step_VJ | 100                |
| TCL-034                           | patient_tumor | CapSeq_One-Step_VJ | 100                |
| TCL-035                           | patient_tumor | CapSeq_One-Step_VJ | 100                |
| TCL-036                           | patient_tumor | CapSeq_One-Step_VJ | 100                |
| TCL-037                           | patient_tumor | CapSeq_One-Step_VJ | 100                |
| TCL-038                           | patient_tumor | CapSeq_One-Step_VJ | 100                |
| TCL-039                           | patient_tumor | CapSeq_One-Step_VJ | 100                |
| TCL-040                           | patient_tumor | CapSeq_One-Step_VJ | 100                |
| TCL-041                           | patient_tumor | CapSeq_One-Step_VJ | 100                |
| TCL-042                           | patient_tumor | CapSeq_One-Step_VJ | 100                |
| TCL-043                           | patient_tumor | CapSeq_One-Step_VJ | 100                |
| TCL-044                           | patient_tumor | CapSeq_One-Step_VJ | 100                |
| TCL-045                           | patient_tumor | CapSeq_One-Step_VJ | 100                |
| TCL-046                           | patient_tumor | CapSeq_One-Step_VJ | 100                |
| TCL-047                           | patient_tumor | CapSeq_One-Step_VJ | 100                |
| TCL-048                           | patient_tumor | CapSeq_One-Step_VJ | 100                |
| TCL-049                           | patient_tumor | CapSeq_One-Step_VJ | 100                |
| TCL-050                           | patient_tumor | CapSeq_One-Step_VJ | 100                |
| TCL-051                           | patient_tumor | CapSeq_One-Step_VJ | 100                |
| TCL-052                           | patient_tumor | CapSeq_One-Step_VJ | 100                |
| TCL-053                           | patient_tumor | CapSeq_One-Step_VJ | 100                |
| TCL-054                           | patient_tumor | CapSeq_One-Step_VJ | 100                |
| TCL-055                           | patient_tumor | CapSeq_One-Step_VJ | 100                |

|         |               |                    |     |
|---------|---------------|--------------------|-----|
| TCL-056 | patient_tumor | CapSeq_One-Step_VJ | 100 |
| TCL-057 | patient_tumor | CapSeq_One-Step_VJ | 100 |
| TCL-058 | patient_tumor | CapSeq_One-Step_VJ | 100 |
| TCL-059 | patient_tumor | CapSeq_One-Step_VJ | 100 |
| TCL-060 | patient_tumor | CapSeq_One-Step_VJ | 100 |
| TCL-061 | patient_tumor | CapSeq_One-Step_VJ | 100 |
| TCL-062 | patient_tumor | CapSeq_One-Step_VJ | 100 |
| TCL-063 | patient_tumor | CapSeq_One-Step_VJ | 100 |
| TCL-064 | patient_tumor | CapSeq_One-Step_VJ | 100 |

**Table 4.2: Capture Sample Read Counts**

| Sample                            | total reads | on-target reads | off-target reads | on-target ratio | merged reads | reads after threshold |
|-----------------------------------|-------------|-----------------|------------------|-----------------|--------------|-----------------------|
| <b>A037 healthy reference</b>     |             |                 |                  |                 |              |                       |
| Sample_A037_PBMC_TCR_A_all        | 1961529     | 96884           | 1864620          | 0.049392081     | 1961504      | 1900159               |
| Sample_A037_PBMC_TCR_B_all        | 9915634     | 865444          | 9050165          | 0.087280753     | 9915609      | 9488814               |
| Sample_A037_PBMC_TCR_D_all        | 11554469    | 359807          | 11194637         | 0.031140072     | 11554444     | 10839947              |
| Sample_A037_PBMC_TCR_E_all        | 8208382     | 4019972         | 4188385          | 0.489739878     | 8208357      | 8069762               |
| Sample_A037_PBMC_TCR_F_all        | 13434420    | 3925996         | 9508399          | 0.292234127     | 13434395     | 13076224              |
| Sample_A037_PBMC_TCR_G_all        | 11585206    | 217323          | 11367858         | 0.018758665     | 11585181     | 11162632              |
| Sample_A037_PBMC_TCR_H_all        | 8680363     | 1631345         | 7048993          | 0.187935113     | 8680338      | 8302862               |
| Sample_A037_PBMC_TCR_I_all        | 17147171    | 504177          | 16642969         | 0.029402926     | 17147146     | 14908072              |
| Sample_A037_PBMC_TCR_K_all        | 8812446     | 518449          | 8293972          | 0.058831453     | 8812421      | 7851064               |
| Sample_A037_PBMC_TCR_L_all        | 21053845    | 429885          | 20623935         | 0.020418361     | 21053820     | 17568322              |
| Sample_16_01_A037_PBMC_TCR_F_all  | 4457394     | 958772          | 3498597          | 0.215096983     | 4457369      | 4389100               |
| Sample_16_01_A037_PBMC_TCR_H_all  | 6835579     | 1719308         | 5116246          | 0.25152339      | 6835554      | 6750376               |
| Sample_A037_S1_all                | 1920124     | 1082540         | 837559           | 0.563786505     | 1920099      | 1867339               |
| Sample_A037_PBMC_1S_all           | 4868959     | 2120537         | 2748397          | 0.435521638     | 4768430      | 4706036               |
| Sample_16_11_A037_PBMC_TCR_VJ_all | 1433221     | 413057          | 1020139          | 0.288201889     | 1433196      | 1427599               |
| Sample_A037_CD3_1S_all            | 4701054     | 2361517         | 2339512          | 0.502337774     | 4701029      | 4651006               |
| <b>Cell lines and flow sorted</b> |             |                 |                  |                 |              |                       |
| M36_EZM                           | 2318060     | 1380043         | 937992           | 0.595343951     | 2318035      | 2255858               |
| M36_TIL2                          | 1569122     | 769525          | 799572           | 0.490417571     | 1569097      | 1518502               |
| OV7-TIL2                          | 2392656     | 1271622         | 1121009          | 0.531468795     | 2392631      | 2320790               |
| CEM                               | 1291244     | 476090          | 815129           | 0.368706457     | 1291219      | 1216685               |
| Jurkat                            | 1339529     | 662257          | 677247           | 0.494395418     | 1339504      | 1293618               |
| MOLT4                             | 1278441     | 564484          | 713932           | 0.441540908     | 1278416      | 1240462               |
| SUPT1                             | 1678562     | 743158          | 935379           | 0.442734912     | 1678537      | 1611636               |
| STIM1                             | 1880814     | 900492          | 980297           | 0.478777806     | 1880789      | 1827853               |
| L2D8                              | 1651306     | 910355          | 740926           | 0.551293946     | 1651281      | 1603088               |
| <b>Patient samples</b>            |             |                 |                  |                 |              |                       |
| TCL-001                           | 3874239     | 1363917         | 2510297          | 0.352047718     | 3874214      | 3641564               |
| TCL-002                           | 4921789     | 1618479         | 3303285          | 0.328839574     | 4921764      | 4871138               |
| TCL-003                           | 4961317     | 1742809         | 3218483          | 0.351279509     | 4961292      | 4808248               |
| TCL-004                           | 4284116     | 1363269         | 2920822          | 0.318214773     | 4284091      | 4230674               |
| TCL-005                           | 5480831     | 1885151         | 3595655          | 0.343953499     | 5480806      | 5423859               |
| TCL-006                           | 5405827     | 415885          | 4989917          | 0.076932725     | 5405802      | 5177500               |
| TCL-007                           | 5135793     | 1690789         | 3444979          | 0.329216734     | 5135768      | 5098364               |
| TCL-008                           | 7798007     | 2759564         | 5038418          | 0.353880677     | 7797982      | 7715502               |
| TCL-009                           | 5006452     | 739003          | 4267424          | 0.147610124     | 5006427      | 4799839               |
| TCL-010                           | 5044768     | 1512141         | 3532602          | 0.299744408     | 5044743      | 4998359               |
| TCL-011                           | 2912824     | 980216          | 1932583          | 0.336517414     | 2912799      | 2891403               |
| TCL-012                           | 6403753     | 976423          | 5427305          | 0.15247668      | 6403728      | 6226299               |
| TCL-013                           | 6648103     | 894302          | 5753776          | 0.134519877     | 6648078      | 6520478               |
| TCL-014                           | 4577658     | 964191          | 3613442          | 0.210629759     | 4577633      | 4516409               |
| TCL-015                           | 4919394     | 671943          | 4247426          | 0.136590604     | 4919369      | 4678232               |
| TCL-016                           | 6045676     | 1996999         | 4048652          | 0.330318562     | 6045651      | 5967138               |
| TCL-017                           | 4339950     | 334232          | 4005693          | 0.077012869     | 4339925      | 4253000               |
| TCL-018                           | 2621464     | 397567          | 2223872          | 0.151658386     | 2621439      | 2552790               |
| TCL-019                           | 6616839     | 3224927         | 3391887          | 0.487381815     | 6616814      | 6538041               |
| TCL-020                           | 4825285     | 658203          | 4167057          | 0.136407072     | 4825260      | 4721235               |
| TCL-021                           | 7352598     | 3438740         | 3913833          | 0.467690468     | 7352573      | 7230944               |
| TCL-022                           | 7015117     | 3588858         | 3426234          | 0.511589187     | 7015092      | 6912948               |
| TCL-023                           | 6427168     | 2297299         | 4129844          | 0.357435654     | 6427143      | 6377748               |
| TCL-024                           | 6466998     | 2244807         | 4222166          | 0.347117318     | 6466973      | 6357148               |
| TCL-025                           | 5149354     | 740986          | 4408343          | 0.143898827     | 5149329      | 4979117               |
| TCL-026                           | 7717729     | 4019388         | 3698316          | 0.520799318     | 7717704      | 7610950               |
| TCL-027                           | 5310114     | 1719071         | 3591018          | 0.323735234     | 5310089      | 5258149               |
| TCL-028                           | 6854324     | 449983          | 6404316          | 0.065649508     | 6854299      | 6571528               |
| TCL-029                           | 4473140     | 636717          | 3836398          | 0.142342292     | 4473115      | 4255663               |
| TCL-030                           | 2901414     | 389561          | 2511828          | 0.134265913     | 2901389      | 2690711               |
| TCL-031                           | 4194422     | 328356          | 3866041          | 0.078283969     | 4194397      | 4104557               |
| TCL-032                           | 4534911     | 634273          | 3900613          | 0.139864487     | 4534886      | 4132215               |
| TCL-033                           | 3653179     | 489927          | 3163227          | 0.134109771     | 3653154      | 3443643               |
| TCL-034                           | 6905643     | 3346628         | 3558990          | 0.484622214     | 6905618      | 6814973               |
| TCL-035                           | 5989679     | 2953254         | 3036400          | 0.49305714      | 5989654      | 5933921               |
| TCL-036                           | 4715544     | 2109689         | 2605830          | 0.447390375     | 4715519      | 4633852               |
| TCL-037                           | 6664469     | 2293770         | 4370674          | 0.344178959     | 6664444      | 6605136               |
| TCL-038                           | 6155725     | 3173681         | 2982019          | 0.515565754     | 6155700      | 6034814               |
| TCL-039                           | 5025139     | 361053          | 4664061          | 0.071849356     | 5025114      | 4886216               |
| TCL-040                           | 5190944     | 361315          | 4829604          | 0.069604873     | 5190919      | 5085124               |
| TCL-041                           | 5745439     | 2814128         | 2931286          | 0.489802085     | 5745414      | 5649598               |
| TCL-042                           | 5328896     | 1787753         | 3541118          | 0.335482809     | 5328871      | 5288026               |
| TCL-043                           | 6030251     | 3161144         | 2869082          | 0.524214332     | 6030226      | 5874655               |
| TCL-044                           | 7376555     | 3887519         | 3489011          | 0.527010102     | 7376530      | 7249500               |
| TCL-045                           | 5401734     | 2916998         | 2484711          | 0.540011411     | 5401709      | 5338260               |
| TCL-046                           | 5346366     | 233692          | 5112649          | 0.043710438     | 5346341      | 5202430               |
| TCL-047                           | 6495674     | 3372030         | 3123619          | 0.51911934      | 6495649      | 6455304               |
| TCL-048                           | 6562054     | 3324004         | 3238025          | 0.506549321     | 6562029      | 6458959               |
| TCL-049                           | 4503869     | 1426322         | 3077522          | 0.316688163     | 4503844      | 4452847               |
| TCL-050                           | 5502711     | 387341          | 5115345          | 0.07039094      | 5502686      | 5398233               |
| TCL-051                           | 6305701     | 392089          | 5913587          | 0.062180081     | 6305676      | 6065963               |

|         |         |         |         |             |         |         |
|---------|---------|---------|---------|-------------|---------|---------|
| TCL-052 | 8302037 | 2704496 | 5597516 | 0.325762942 | 8302012 | 8107829 |
| TCL-053 | 3834967 | 292000  | 3542942 | 0.076141464 | 3834942 | 3767575 |
| TCL-054 | 6935912 | 3615566 | 3320321 | 0.521281989 | 6935887 | 6892616 |
| TCL-055 | 6078396 | 1963007 | 4115364 | 0.322948192 | 6078371 | 6014071 |
| TCL-056 | 6865892 | 3557974 | 3307893 | 0.518210016 | 6865867 | 6816073 |
| TCL-057 | 6227227 | 3087220 | 3139982 | 0.495761597 | 6227202 | 6169114 |
| TCL-058 | 6215041 | 2213245 | 4001771 | 0.356111086 | 6215016 | 6155386 |
| TCL-059 | 5639514 | 2766020 | 2873469 | 0.490471342 | 5639489 | 5564062 |
| TCL-060 | 5680891 | 2792325 | 2888541 | 0.49152941  | 5680866 | 5628837 |
| TCL-061 | 6906018 | 3575635 | 3330358 | 0.517756397 | 6905993 | 6843330 |
| TCL-062 | 3920359 | 589850  | 3330484 | 0.15045816  | 3920334 | 3808959 |
| TCL-063 | 4275264 | 769512  | 3505727 | 0.179991692 | 4275239 | 4205077 |
| TCL-064 | 6551470 | 3277319 | 3274126 | 0.500241778 | 6551445 | 6481344 |

**Table 4.3: Capture Sample V and J Calls**

| Sample                            | alpha VJ calls | beta VJ calls | gamma VJ calls | delta VJ calls | unmatched VJ calls | single V or J | absent V and J |
|-----------------------------------|----------------|---------------|----------------|----------------|--------------------|---------------|----------------|
| <b>A037 healthy reference</b>     |                |               |                |                |                    |               |                |
| Sample_A037_PBMC_TCR_A_all        | 30             | 111           | 46             | 0              | 0                  | 171866        | 1728107        |
| Sample_A037_PBMC_TCR_B_all        | 473            | 806           | 538            | 0              | 0                  | 1634949       | 7852049        |
| Sample_A037_PBMC_TCR_D_all        | 298            | 244           | 127            | 1              | 0                  | 583395        | 10255883       |
| Sample_A037_PBMC_TCR_E_all        | 4470           | 1956          | 2916           | 82             | 5                  | 5486404       | 2573930        |
| Sample_A037_PBMC_TCR_F_all        | 3932           | 1815          | 3169           | 84             | 6                  | 5949549       | 7117670        |
| Sample_A037_PBMC_TCR_G_all        | 101            | 186           | 78             | 15             | 0                  | 420033        | 10742220       |
| Sample_A037_PBMC_TCR_H_all        | 1607           | 1125          | 252            | 12             | 4                  | 2160797       | 6139066        |
| Sample_A037_PBMC_TCR_J_all        | 323            | 139           | 135            | 4              | 2                  | 1112523       | 13794947       |
| Sample_A037_PBMC_TCR_K_all        | 352            | 169           | 200            | 6              | 0                  | 1027278       | 6823060        |
| Sample_A037_PBMC_TCR_L_all        | 259            | 111           | 136            | 8              | 3                  | 1057487       | 16510319       |
| Sample_16_01_A037_PBMC_TCR_F_all  | 925            | 363           | 628            | 25             | 1                  | 3437777       | 949382         |
| Sample_16_01_A037_PBMC_TCR_H_all  | 1397           | 763           | 1015           | 21             | 2                  | 4575171       | 2172015        |
| Sample_A037_S1_all                | 1052           | 606           | 734            | 12             | 2                  | 1255308       | 609626         |
| Sample_A037_PBMC_1S_all           | 1008           | 599           | 834            | 26             | 1                  | 2536312       | 2167257        |
| Sample_16_11_A037_PBMC_TCR_VJ_all | 340            | 161           | 329            | 11             | 0                  | 934369        | 492390         |
| Sample_A037_CD3_1S_all            | 6368           | 3264          | 4805           | 123            | 7                  | 2753833       | 1882607        |
| <b>Cell lines and flow sorted</b> |                |               |                |                |                    |               |                |
| M36_EZM                           | 138            | 94            | 94             | 0              | 0                  | 1521931       | 733602         |
| M36_TIL2                          | 2136           | 1579          | 1963           | 4              | 7                  | 1015956       | 496858         |
| OV7-TIL2                          | 2619           | 1879          | 1918           | 52             | 1                  | 1515855       | 798467         |
| CEM                               | 2450           | 1293          | 2070           | 0              | 0                  | 818261        | 392612         |
| Jurkat                            | 1389           | 924           | 1344           | 0              | 0                  | 895089        | 394873         |
| MOLT4                             | 1910           | 2833          | 1377           | 0              | 0                  | 856362        | 377981         |
| SUPT1                             | 3031           | 2017          | 2157           | 0              | 0                  | 1020846       | 583586         |
| STIM1                             | 3068           | 1524          | 2503           | 0              | 0                  | 1192227       | 628532         |
| L2D8                              | 2074           | 962           | 948            | 0              | 0                  | 1060361       | 538744         |
| <b>Patient samples</b>            |                |               |                |                |                    |               |                |
| TCL-001                           | 1971           | 1098          | 1674           | 48             | 0                  | 2380500       | 1256274        |
| TCL-002                           | 585            | 283           | 628            | 9              | 0                  | 2811142       | 2058492        |
| TCL-003                           | 1423           | 901           | 1278           | 8              | 6                  | 2599812       | 2204821        |
| TCL-004                           | 182            | 251           | 142            | 0              | 2                  | 2473198       | 1756900        |
| TCL-005                           | 210            | 65            | 192            | 0              | 3                  | 3272558       | 2150832        |
| TCL-006                           | 17             | 36            | 25             | 0              | 0                  | 768985        | 4408438        |
| TCL-007                           | 343            | 141           | 2481           | 648            | 0                  | 2982597       | 2112155        |
| TCL-008                           | 1267           | 857           | 1327           | 4              | 3                  | 4868928       | 2843117        |
| TCL-009                           | 986            | 607           | 967            | 14             | 0                  | 1069367       | 3727899        |
| TCL-010                           | 1600           | 960           | 2053           | 40             | 1                  | 2485050       | 2508656        |
| TCL-011                           | 215            | 87            | 248            | 22             | 0                  | 1710714       | 1180118        |
| TCL-012                           | 1620           | 688           | 2344           | 13             | 1                  | 1571492       | 4650142        |
| TCL-013                           | 1995           | 1039          | 2144           | 108            | 7                  | 1527402       | 4987784        |
| TCL-014                           | 155            | 163           | 290            | 45             | 0                  | 1742539       | 2773218        |
| TCL-015                           | 1083           | 562           | 967            | 7              | 1                  | 1084783       | 3590830        |
| TCL-016                           | 981            | 247           | 494            | 15             | 0                  | 3030809       | 2934593        |
| TCL-017                           | 166            | 84            | 174            | 4              | 3                  | 613083        | 3639487        |
| TCL-018                           | 623            | 332           | 545            | 7              | 0                  | 1160605       | 4390679        |
| TCL-019                           | 3489           | 2654          | 3136           | 19             | 1                  | 4047376       | 2481367        |
| TCL-020                           | 4218           | 1546          | 1551           | 0              | 3                  | 986010        | 3727908        |
| TCL-021                           | 4607           | 2563          | 3523           | 64             | 6                  | 4297650       | 2922532        |
| TCL-022                           | 1974           | 904           | 1199           | 11             | 6                  | 4479570       | 2429285        |
| TCL-023                           | 186            | 86            | 271            | 2              | 1                  | 2435125       | 3942078        |
| TCL-024                           | 484            | 371           | 533            | 12             | 0                  | 3411599       | 2944150        |
| TCL-025                           | 575            | 241           | 481            | 1              | 0                  | 1235788       | 3742032        |
| TCL-026                           | 863            | 471           | 705            | 39             | 0                  | 4942133       | 2666740        |
| TCL-027                           | 0              | 0             | 0              | 0              | 0                  | 2721814       | 2536336        |
| TCL-028                           | 119            | 77            | 140            | 0              | 0                  | 913846        | 5657347        |
| TCL-029                           | 1274           | 727           | 888            | 4              | 3                  | 985106        | 3267662        |
| TCL-030                           | 497            | 190           | 442            | 5              | 4                  | 615177        | 2074397        |
| TCL-031                           | 5              | 2             | 396            | 611            | 0                  | 630487        | 3473057        |
| TCL-032                           | 409            | 228           | 420            | 23             | 0                  | 936724        | 3194412        |
| TCL-033                           | 1122           | 577           | 915            | 2              | 1                  | 797093        | 2643934        |
| TCL-034                           | 901            | 469           | 861            | 24             | 1                  | 1741112       | 5071606        |
| TCL-035                           | 2181           | 861           | 1674           | 141            | 2                  | 3472975       | 2456088        |
| TCL-036                           | 5077           | 4087          | 4193           | 0              | 0                  | 2889813       | 1730683        |
| TCL-037                           | 536            | 342           | 860            | 6              | 0                  | 4144765       | 2458628        |
| TCL-038                           | 682            | 417           | 723            | 21             | 0                  | 3850370       | 2182602        |
| TCL-039                           | 264            | 104           | 232            | 0              | 2                  | 735636        | 4149979        |
| TCL-040                           | 340            | 228           | 434            | 0              | 0                  | 739308        | 4344815        |
| TCL-041                           | 1987           | 1338          | 1755           | 12             | 0                  | 3223885       | 2420622        |
| TCL-042                           | 229            | 150           | 287            | 3              | 0                  | 3138235       | 2149123        |
| TCL-043                           | 273            | 223           | 299            | 0              | 0                  | 3574689       | 2299172        |
| TCL-044                           | 638            | 335           | 605            | 29             | 0                  | 4327667       | 2920227        |
| TCL-045                           | 140            | 107           | 117            | 0              | 2                  | 3224632       | 2113263        |
| TCL-046                           | 741            | 374           | 842            | 0              | 0                  | 643355        | 4557119        |
| TCL-047                           | 451            | 268           | 447            | 12             | 0                  | 3838965       | 2615162        |
| TCL-048                           | 868            | 350           | 718            | 1              | 1                  | 4020234       | 2436788        |
| TCL-049                           | 1208           | 712           | 1318           | 7              | 0                  | 2691103       | 1758500        |
| TCL-050                           | 407            | 183           | 387            | 2              | 0                  | 779518        | 4617737        |
| TCL-051                           | 119            | 84            | 83             | 0              | 0                  | 767911        | 5297767        |
| TCL-052                           | 8600           | 3192          | 5559           | 101            | 7                  | 5264470       | 2825901        |
| TCL-053                           | 327            | 203           | 562            | 0              | 1                  | 561308        | 3205175        |
| TCL-054                           | 446            | 253           | 483            | 6              | 2                  | 3805780       | 3085647        |
| TCL-055                           | 969            | 508           | 1009           | 13             | 0                  | 3034468       | 2977105        |

|         |      |     |      |    |   |         |         |
|---------|------|-----|------|----|---|---------|---------|
| TCL-056 | 269  | 127 | 286  | 34 | 0 | 2887666 | 3927692 |
| TCL-057 | 2011 | 885 | 1324 | 82 | 4 | 3843001 | 2321808 |
| TCL-058 | 276  | 191 | 275  | 0  | 1 | 3558414 | 2596230 |
| TCL-059 | 1559 | 821 | 1398 | 24 | 0 | 3448607 | 2111654 |
| TCL-060 | 1475 | 761 | 1463 | 41 | 3 | 3503916 | 2121179 |
| TCL-061 | 200  | 84  | 143  | 9  | 0 | 3519287 | 3323608 |
| TCL-062 | 647  | 375 | 627  | 11 | 2 | 931289  | 2876009 |
| TCL-063 | 360  | 159 | 355  | 7  | 3 | 1064180 | 3140014 |
| TCL-064 | 1187 | 596 | 1118 | 13 | 3 | 2942292 | 3536136 |

**Table 4.4: Capture Sample Unique V and J Calls**

| Sample                            | alpha unique VJ counts | beta unique VJ counts | gamma unique VJ counts | delta unique VJ counts | total unique VJ | Unique VJ normalized to input |
|-----------------------------------|------------------------|-----------------------|------------------------|------------------------|-----------------|-------------------------------|
| <b>A037 healthy reference</b>     |                        |                       |                        |                        |                 |                               |
| Sample_A037_PBMC_TCR_A_all        | 11                     | 20                    | 6                      | 0                      | 37              | 0.37                          |
| Sample_A037_PBMC_TCR_B_all        | 44                     | 65                    | 18                     | 0                      | 127             | 0.64                          |
| Sample_A037_PBMC_TCR_D_all        | 213                    | 158                   | 25                     | 1                      | 397             | 0.66                          |
| Sample_A037_PBMC_TCR_E_all        | 955                    | 405                   | 49                     | 3                      | 1412            | 1.77                          |
| Sample_A037_PBMC_TCR_F_all        | 1343                   | 527                   | 49                     | 6                      | 1925            | 1.93                          |
| Sample_A037_PBMC_TCR_G_all        | 8                      | 18                    | 5                      | 1                      | 32              | 0.16                          |
| Sample_A037_PBMC_TCR_H_all        | 502                    | 305                   | 24                     | 2                      | 833             | 1.39                          |
| Sample_A037_PBMC_TCR_J_all        | 192                    | 90                    | 21                     | 3                      | 306             | 1.53                          |
| Sample_A037_PBMC_TCR_K_all        | 268                    | 122                   | 32                     | 4                      | 426             | 0.71                          |
| Sample_A037_PBMC_TCR_L_all        | 220                    | 85                    | 24                     | 3                      | 332             | 0.33                          |
| Sample_16_01_A037_PBMC_TCR_F_all  | 414                    | 175                   | 41                     | 2                      | 632             | 1.26                          |
| Sample_16_01_A037_PBMC_TCR_H_all  | 463                    | 235                   | 34                     | 3                      | 735             | 2.94                          |
| Sample_A037_S1_all                | 446                    | 227                   | 36                     | 3                      | 712             | 7.12                          |
| Sample_A037_PBMC_1S_all           | 466                    | 253                   | 36                     | 4                      | 759             | 7.59                          |
| Sample_16_11_A037_PBMC_TCR_VJ_all | 263                    | 125                   | 36                     | 3                      | 427             | 4.27                          |
| Sample_A037_CD3_1S_all            | 1704                   | 710                   | 54                     | 7                      | 2475            | 24.75                         |
| <b>Cell lines and flow sorted</b> |                        |                       |                        |                        |                 |                               |
| M36_EZM                           | 67                     | 41                    | 15                     | 0                      | 123             | 1.23                          |
| M36_TIL2                          | 244                    | 163                   | 38                     | 1                      | 446             | 4.46                          |
| OV7-TIL2                          | 143                    | 114                   | 49                     | 5                      | 311             | 3.11                          |
| CEM                               | 6                      | 13                    | 5                      | 0                      | 24              | 0.24                          |
| Jurkat                            | 14                     | 3                     | 5                      | 0                      | 22              | 0.22                          |
| MOLT4                             | 5                      | 16                    | 7                      | 0                      | 28              | 0.28                          |
| SUPT1                             | 9                      | 9                     | 6                      | 0                      | 24              | 0.24                          |
| STIM1                             | 101                    | 71                    | 23                     | 0                      | 195             | 1.95                          |
| L2D8                              | 6                      | 3                     | 3                      | 0                      | 12              | 0.12                          |
| <b>Patient samples</b>            |                        |                       |                        |                        |                 |                               |
| TCL-001                           | 225                    | 142                   | 33                     | 2                      | 402             | 4.02                          |
| TCL-002                           | 137                    | 63                    | 28                     | 2                      | 230             | 2.30                          |
| TCL-003                           | 242                    | 147                   | 39                     | 1                      | 429             | 4.29                          |
| TCL-004                           | 37                     | 39                    | 15                     | 0                      | 91              | 0.91                          |
| TCL-005                           | 35                     | 14                    | 21                     | 0                      | 70              | 0.70                          |
| TCL-006                           | 14                     | 16                    | 8                      | 0                      | 38              | 0.38                          |
| TCL-007                           | 59                     | 32                    | 15                     | 1                      | 107             | 1.07                          |
| TCL-008                           | 174                    | 132                   | 34                     | 1                      | 341             | 3.41                          |
| TCL-009                           | 433                    | 229                   | 47                     | 4                      | 713             | 7.13                          |
| TCL-010                           | 178                    | 104                   | 25                     | 4                      | 311             | 3.11                          |
| TCL-011                           | 44                     | 19                    | 21                     | 2                      | 86              | 0.86                          |
| TCL-012                           | 221                    | 146                   | 33                     | 2                      | 402             | 4.02                          |
| TCL-013                           | 410                    | 201                   | 46                     | 5                      | 662             | 6.62                          |
| TCL-014                           | 34                     | 33                    | 18                     | 3                      | 88              | 0.88                          |
| TCL-015                           | 485                    | 242                   | 50                     | 2                      | 779             | 7.79                          |
| TCL-016                           | 227                    | 62                    | 26                     | 2                      | 317             | 3.17                          |
| TCL-017                           | 73                     | 43                    | 24                     | 1                      | 141             | 1.41                          |
| TCL-018                           | 327                    | 173                   | 41                     | 3                      | 544             | 5.44                          |
| TCL-019                           | 352                    | 203                   | 46                     | 5                      | 606             | 6.06                          |
| TCL-020                           | 19                     | 18                    | 7                      | 0                      | 44              | 0.44                          |
| TCL-021                           | 798                    | 405                   | 53                     | 4                      | 1260            | 12.60                         |
| TCL-022                           | 260                    | 132                   | 31                     | 2                      | 425             | 4.25                          |
| TCL-023                           | 53                     | 23                    | 24                     | 1                      | 101             | 1.01                          |
| TCL-024                           | 99                     | 79                    | 32                     | 1                      | 211             | 2.11                          |
| TCL-025                           | 278                    | 113                   | 40                     | 1                      | 432             | 4.32                          |
| TCL-026                           | 173                    | 112                   | 29                     | 3                      | 317             | 3.17                          |
| TCL-027                           | 0                      | 0                     | 0                      | 0                      | 0               | 0.00                          |
| TCL-028                           | 66                     | 37                    | 27                     | 0                      | 130             | 1.30                          |
| TCL-029                           | 513                    | 262                   | 32                     | 3                      | 810             | 8.10                          |
| TCL-030                           | 157                    | 70                    | 23                     | 1                      | 251             | 2.51                          |
| TCL-031                           | 3                      | 1                     | 3                      | 3                      | 10              | 0.10                          |
| TCL-032                           | 148                    | 89                    | 35                     | 4                      | 276             | 2.76                          |
| TCL-033                           | 456                    | 205                   | 45                     | 1                      | 707             | 7.07                          |
| TCL-034                           | 164                    | 103                   | 29                     | 5                      | 301             | 3.01                          |
| TCL-035                           | 480                    | 186                   | 39                     | 5                      | 710             | 7.10                          |
| TCL-036                           | 237                    | 146                   | 43                     | 0                      | 426             | 4.26                          |
| TCL-037                           | 105                    | 64                    | 26                     | 1                      | 196             | 1.96                          |
| TCL-038                           | 150                    | 99                    | 34                     | 2                      | 285             | 2.85                          |
| TCL-039                           | 76                     | 32                    | 22                     | 0                      | 130             | 1.30                          |
| TCL-040                           | 171                    | 106                   | 39                     | 0                      | 316             | 3.16                          |
| TCL-041                           | 258                    | 160                   | 34                     | 2                      | 454             | 4.54                          |
| TCL-042                           | 34                     | 28                    | 21                     | 1                      | 84              | 0.84                          |
| TCL-043                           | 72                     | 60                    | 29                     | 0                      | 161             | 1.61                          |
| TCL-044                           | 125                    | 77                    | 27                     | 3                      | 232             | 2.32                          |
| TCL-045                           | 44                     | 32                    | 19                     | 0                      | 95              | 0.95                          |
| TCL-046                           | 17                     | 9                     | 13                     | 0                      | 39              | 0.39                          |
| TCL-047                           | 90                     | 61                    | 30                     | 2                      | 183             | 1.83                          |
| TCL-048                           | 177                    | 75                    | 29                     | 1                      | 282             | 2.82                          |
| TCL-049                           | 190                    | 128                   | 27                     | 3                      | 348             | 3.48                          |
| TCL-050                           | 85                     | 41                    | 29                     | 1                      | 156             | 1.56                          |
| TCL-051                           | 45                     | 32                    | 24                     | 0                      | 101             | 1.01                          |
| TCL-052                           | 1019                   | 362                   | 55                     | 6                      | 1442            | 14.42                         |
| TCL-053                           | 50                     | 38                    | 28                     | 0                      | 116             | 1.16                          |
| TCL-054                           | 120                    | 59                    | 24                     | 1                      | 204             | 2.04                          |

|         |     |     |    |   |     |      |
|---------|-----|-----|----|---|-----|------|
| TCL-055 | 214 | 121 | 30 | 1 | 366 | 3.66 |
| TCL-056 | 90  | 46  | 32 | 2 | 170 | 1.70 |
| TCL-057 | 435 | 194 | 33 | 6 | 668 | 6.68 |
| TCL-058 | 51  | 36  | 21 | 0 | 108 | 1.08 |
| TCL-059 | 294 | 169 | 57 | 3 | 523 | 5.23 |
| TCL-060 | 349 | 185 | 31 | 5 | 570 | 5.70 |
| TCL-061 | 44  | 25  | 15 | 1 | 85  | 0.85 |
| TCL-062 | 309 | 159 | 39 | 4 | 511 | 5.11 |
| TCL-063 | 174 | 73  | 38 | 2 | 287 | 2.87 |
| TCL-064 | 353 | 170 | 57 | 1 | 581 | 5.81 |

**Table 4.5: Capture Sample Unique CDR3 Calls**

| Sample                            | alpha total<br>unique CDR3 | beta total<br>unique CDR3 | gamma total<br>unique CDR3 | delta total<br>unique CDR3 | total unique<br>CDR3 | Unique CDR3<br>normalized to input |
|-----------------------------------|----------------------------|---------------------------|----------------------------|----------------------------|----------------------|------------------------------------|
| <b>A037 healthy reference</b>     |                            |                           |                            |                            |                      |                                    |
| Sample_A037_PBMC_TCR_A_all        | 12                         | 27                        | 9                          | 0                          | 48                   | 0.48                               |
| Sample_A037_PBMC_TCR_B_all        | 63                         | 104                       | 31                         | 0                          | 198                  | 0.99                               |
| Sample_A037_PBMC_TCR_D_all        | 229                        | 188                       | 65                         | 2                          | 484                  | 0.81                               |
| Sample_A037_PBMC_TCR_E_all        | 1367                       | 778                       | 348                        | 21                         | 2514                 | 3.14                               |
| Sample_A037_PBMC_TCR_F_all        | 2066                       | 1100                      | 540                        | 24                         | 3730                 | 3.73                               |
| Sample_A037_PBMC_TCR_G_all        | 11                         | 23                        | 11                         | 3                          | 48                   | 0.24                               |
| Sample_A037_PBMC_TCR_H_all        | 633                        | 482                       | 62                         | 3                          | 1180                 | 1.97                               |
| Sample_A037_PBMC_TCR_J_all        | 216                        | 104                       | 48                         | 4                          | 372                  | 1.86                               |
| Sample_A037_PBMC_TCR_K_all        | 297                        | 148                       | 82                         | 5                          | 532                  | 0.89                               |
| Sample_A037_PBMC_TCR_L_all        | 242                        | 99                        | 63                         | 8                          | 412                  | 0.41                               |
| Sample_16_01_A037_PBMC_TCR_F_all  | 482                        | 229                       | 155                        | 14                         | 880                  | 1.76                               |
| Sample_16_01_A037_PBMC_TCR_H_all  | 555                        | 330                       | 158                        | 4                          | 1047                 | 4.19                               |
| Sample_A037_S1_all                | 509                        | 303                       | 141                        | 5                          | 958                  | 9.58                               |
| Sample_A037_PBMC_1S_all           | 539                        | 344                       | 157                        | 13                         | 1053                 | 10.53                              |
| Sample_16_11_A037_PBMC_TCR_VJ_all | 293                        | 142                       | 114                        | 8                          | 557                  | 5.57                               |
| Sample_A037_CD3_1S_all            | 2840                       | 1672                      | 691                        | 47                         | 5250                 | 52.50                              |
| <b>Cell lines and flow sorted</b> |                            |                           |                            |                            |                      |                                    |
| M36_EZM                           | 70                         | 48                        | 26                         | 0                          | 144                  | 1.44                               |
| M36_TIL2                          | 310                        | 25                        | 101                        | 2                          | 438                  | 4.38                               |
| OV7-TIL2                          | 219                        | 192                       | 83                         | 9                          | 503                  | 5.03                               |
| CEM                               | 32                         | 29                        | 21                         | 0                          | 82                   | 0.82                               |
| Jurkat                            | 32                         | 21                        | 10                         | 0                          | 63                   | 0.63                               |
| MOLT4                             | 10                         | 66                        | 8                          | 0                          | 84                   | 0.84                               |
| SUPT1                             | 33                         | 39                        | 23                         | 0                          | 95                   | 0.95                               |
| STIM1                             | 160                        | 136                       | 55                         | 0                          | 351                  | 3.51                               |
| L2D8                              | 14                         | 21                        | 10                         | 0                          | 45                   | 0.45                               |
| <b>Patient samples</b>            |                            |                           |                            |                            |                      |                                    |
| TCL-001                           | 279                        | 201                       | 101                        | 3                          | 584                  | 5.84                               |
| TCL-002                           | 151                        | 80                        | 54                         | 2                          | 287                  | 2.87                               |
| TCL-003                           | 287                        | 193                       | 97                         | 1                          | 578                  | 5.78                               |
| TCL-004                           | 41                         | 57                        | 30                         | 0                          | 128                  | 1.28                               |
| TCL-005                           | 39                         | 17                        | 28                         | 0                          | 84                   | 0.84                               |
| TCL-006                           | 14                         | 16                        | 11                         | 0                          | 41                   | 0.41                               |
| TCL-007                           | 66                         | 43                        | 52                         | 18                         | 179                  | 1.79                               |
| TCL-008                           | 206                        | 185                       | 89                         | 1                          | 481                  | 4.81                               |
| TCL-009                           | 494                        | 323                       | 183                        | 7                          | 1007                 | 10.07                              |
| TCL-010                           | 223                        | 164                       | 79                         | 10                         | 476                  | 4.76                               |
| TCL-011                           | 55                         | 23                        | 32                         | 6                          | 116                  | 1.16                               |
| TCL-012                           | 253                        | 216                       | 102                        | 6                          | 577                  | 5.77                               |
| TCL-013                           | 516                        | 313                       | 167                        | 20                         | 1016                 | 10.16                              |
| TCL-014                           | 35                         | 40                        | 34                         | 8                          | 117                  | 1.17                               |
| TCL-015                           | 562                        | 321                       | 193                        | 3                          | 1079                 | 10.79                              |
| TCL-016                           | 255                        | 75                        | 66                         | 3                          | 399                  | 3.99                               |
| TCL-017                           | 76                         | 47                        | 42                         | 2                          | 167                  | 1.67                               |
| TCL-018                           | 371                        | 224                       | 140                        | 5                          | 740                  | 7.40                               |
| TCL-019                           | 448                        | 314                       | 163                        | 8                          | 933                  | 9.33                               |
| TCL-020                           | 83                         | 67                        | 10                         | 0                          | 160                  | 1.60                               |
| TCL-021                           | 1084                       | 714                       | 275                        | 12                         | 2085                 | 20.85                              |
| TCL-022                           | 303                        | 170                       | 84                         | 4                          | 561                  | 5.61                               |
| TCL-023                           | 57                         | 31                        | 40                         | 1                          | 129                  | 1.29                               |
| TCL-024                           | 114                        | 101                       | 68                         | 3                          | 286                  | 2.86                               |
| TCL-025                           | 308                        | 140                       | 108                        | 1                          | 557                  | 5.57                               |
| TCL-026                           | 202                        | 139                       | 71                         | 5                          | 417                  | 4.17                               |
| TCL-027                           | 0                          | 0                         | 0                          | 0                          | 0                    | 0.00                               |
| TCL-028                           | 69                         | 38                        | 50                         | 0                          | 157                  | 1.57                               |
| TCL-029                           | 613                        | 381                       | 164                        | 3                          | 1161                 | 11.61                              |
| TCL-030                           | 177                        | 78                        | 72                         | 3                          | 330                  | 3.30                               |
| TCL-031                           | 3                          | 1                         | 13                         | 11                         | 28                   | 0.28                               |
| TCL-032                           | 162                        | 109                       | 79                         | 10                         | 360                  | 3.60                               |
| TCL-033                           | 532                        | 290                       | 158                        | 1                          | 981                  | 9.81                               |
| TCL-034                           | 189                        | 129                       | 78                         | 13                         | 409                  | 4.09                               |
| TCL-035                           | 583                        | 252                       | 138                        | 10                         | 983                  | 9.83                               |
| TCL-036                           | 317                        | 301                       | 99                         | 0                          | 717                  | 7.17                               |
| TCL-037                           | 123                        | 82                        | 74                         | 1                          | 280                  | 2.80                               |
| TCL-038                           | 166                        | 125                       | 75                         | 4                          | 370                  | 3.70                               |
| TCL-039                           | 82                         | 38                        | 37                         | 0                          | 157                  | 1.57                               |
| TCL-040                           | 181                        | 125                       | 102                        | 0                          | 408                  | 4.08                               |
| TCL-041                           | 306                        | 231                       | 118                        | 3                          | 658                  | 6.58                               |
| TCL-042                           | 37                         | 34                        | 33                         | 1                          | 105                  | 1.05                               |
| TCL-043                           | 77                         | 73                        | 50                         | 0                          | 200                  | 2.00                               |
| TCL-044                           | 140                        | 99                        | 65                         | 8                          | 312                  | 3.12                               |
| TCL-045                           | 45                         | 35                        | 26                         | 0                          | 106                  | 1.06                               |
| TCL-046                           | 31                         | 21                        | 16                         | 0                          | 68                   | 0.68                               |
| TCL-047                           | 114                        | 78                        | 53                         | 5                          | 250                  | 2.50                               |
| TCL-048                           | 212                        | 100                       | 78                         | 1                          | 391                  | 3.91                               |
| TCL-049                           | 224                        | 168                       | 85                         | 3                          | 480                  | 4.80                               |
| TCL-050                           | 104                        | 52                        | 42                         | 1                          | 199                  | 1.99                               |

|         |      |     |     |    |      |       |
|---------|------|-----|-----|----|------|-------|
| TCL-051 | 48   | 36  | 32  | 0  | 116  | 1.16  |
| TCL-052 | 1469 | 619 | 279 | 15 | 2382 | 23.82 |
| TCL-053 | 57   | 44  | 50  | 0  | 151  | 1.51  |
| TCL-054 | 127  | 71  | 56  | 1  | 255  | 2.55  |
| TCL-055 | 259  | 147 | 108 | 2  | 516  | 5.16  |
| TCL-056 | 96   | 54  | 59  | 4  | 213  | 2.13  |
| TCL-057 | 520  | 284 | 120 | 11 | 935  | 9.35  |
| TCL-058 | 58   | 45  | 32  | 0  | 135  | 1.35  |
| TCL-059 | 351  | 220 | 123 | 4  | 698  | 6.98  |
| TCL-060 | 408  | 247 | 123 | 7  | 785  | 7.85  |
| TCL-061 | 47   | 29  | 25  | 2  | 103  | 1.03  |
| TCL-062 | 346  | 214 | 113 | 6  | 679  | 6.79  |
| TCL-063 | 188  | 85  | 87  | 3  | 363  | 3.63  |
| TCL-064 | 418  | 242 | 162 | 3  | 825  | 8.25  |

Table 5: A037 Lymphotrack vs A037 CapTCR-Seq (single sample), VJ gene rearrangement counts and proportions (MiXCR)

| V-Gene   | A037-Cap-TRBJ1 | A037-Cap-TRBJ2 | A037-Cap-Prop-TRBJ1 | A037-Cap-Prop-TRBJ2 | A037-PCR-TRBJ1 | A037-PCR-TRBJ2 | A037-PCR-Prop-TRBJ1 | A037-PCR-Prop-TRBJ2 |
|----------|----------------|----------------|---------------------|---------------------|----------------|----------------|---------------------|---------------------|
| TRBV10-1 | 5              | 6              | 0.01                | 0.02                | 33             | 38             | 0.01                | 0.01                |
| TRBV10-2 | 3              | 1              | 0.01                | 0.00                | 15             | 10             | 0.00                | 0.00                |
| TRBV10-3 | 8              | 8              | 0.02                | 0.03                | 68             | 47             | 0.02                | 0.02                |
| TRBV11-1 | 0              | 0              | 0.00                | 0.00                | 10             | 19             | 0.00                | 0.01                |
| TRBV11-2 | 4              | 3              | 0.01                | 0.01                | 104            | 89             | 0.03                | 0.03                |
| TRBV13   | 1              | 6              | 0.00                | 0.02                | 30             | 29             | 0.01                | 0.01                |
| TRBV12-5 | 1              | 4              | 0.00                | 0.01                | 35             | 65             | 0.01                | 0.02                |
| TRBV14   | 4              | 4              | 0.01                | 0.01                | 55             | 59             | 0.02                | 0.02                |
| TRBV15   | 5              | 5              | 0.01                | 0.02                | 74             | 52             | 0.02                | 0.02                |
| TRBV16   | 1              | 0              | 0.00                | 0.00                | 5              | 1              | 0.00                | 0.00                |
| TRBV18   | 19             | 8              | 0.06                | 0.03                | 135            | 86             | 0.04                | 0.03                |
| TRBV19   | 28             | 20             | 0.08                | 0.07                | 166            | 112            | 0.05                | 0.04                |
| TRBV2    | 13             | 17             | 0.04                | 0.06                | 163            | 138            | 0.05                | 0.05                |
| TRBV20-1 | 35             | 39             | 0.10                | 0.14                | 362            | 330            | 0.11                | 0.11                |
| TRBV21-1 | 9              | 7              | 0.03                | 0.02                | 0              | 0              | 0.00                | 0.00                |
| TRBV23-1 | 1              | 2              | 0.00                | 0.01                | 27             | 15             | 0.01                | 0.00                |
| TRBV24-1 | 7              | 17             | 0.02                | 0.06                | 63             | 57             | 0.02                | 0.02                |
| TRBV25-1 | 3              | 2              | 0.01                | 0.01                | 57             | 46             | 0.02                | 0.02                |
| TRBV27   | 19             | 14             | 0.06                | 0.05                | 134            | 103            | 0.04                | 0.03                |
| TRBV28   | 22             | 14             | 0.07                | 0.05                | 182            | 122            | 0.05                | 0.04                |
| TRBV29-1 | 13             | 6              | 0.04                | 0.02                | 105            | 85             | 0.03                | 0.03                |
| TRBV3-1  | 3              | 4              | 0.01                | 0.01                | 42             | 30             | 0.01                | 0.01                |
| TRBV30   | 7              | 6              | 0.02                | 0.02                | 56             | 39             | 0.02                | 0.01                |
| TRBV4-1  | 13             | 6              | 0.04                | 0.02                | 87             | 78             | 0.03                | 0.03                |
| TRBV4-2  | 2              | 2              | 0.01                | 0.01                | 40             | 44             | 0.01                | 0.01                |
| TRBV4-3  | 1              | 0              | 0.00                | 0.00                | 57             | 45             | 0.02                | 0.01                |
| TRBV5-1  | 17             | 17             | 0.05                | 0.06                | 114            | 113            | 0.03                | 0.04                |
| TRBV5-4  | 3              | 2              | 0.01                | 0.01                | 50             | 71             | 0.01                | 0.02                |
| TRBV5-6  | 0              | 1              | 0.00                | 0.00                | 37             | 46             | 0.01                | 0.02                |
| TRBV5-8  | 1              | 0              | 0.00                | 0.00                | 24             | 31             | 0.01                | 0.01                |

|      |    |    |      |      |     |     |      |      |
|------|----|----|------|------|-----|-----|------|------|
| TRBV |    |    |      |      |     |     |      |      |
| 6-1  | 6  | 5  | 0.02 | 0.02 | 96  | 68  | 0.03 | 0.02 |
| TRBV |    |    |      |      |     |     |      |      |
| 6-4  | 5  | 7  | 0.01 | 0.02 | 66  | 109 | 0.02 | 0.04 |
| TRBV |    |    |      |      |     |     |      |      |
| 6-5  | 12 | 4  | 0.04 | 0.01 | 169 | 123 | 0.05 | 0.04 |
| TRBV |    |    |      |      |     |     |      |      |
| 6-6  | 5  | 4  | 0.01 | 0.01 | 69  | 51  | 0.02 | 0.02 |
| TRBV |    |    |      |      |     |     |      |      |
| 7-2  | 5  | 9  | 0.01 | 0.03 | 99  | 122 | 0.03 | 0.04 |
| TRBV |    |    |      |      |     |     |      |      |
| 6-7  | 0  | 2  | 0.00 | 0.01 | 5   | 5   | 0.00 | 0.00 |
| TRBV |    |    |      |      |     |     |      |      |
| 7-3  | 7  | 5  | 0.02 | 0.02 | 85  | 123 | 0.03 | 0.04 |
| TRBV |    |    |      |      |     |     |      |      |
| 7-4  | 1  | 0  | 0.00 | 0.00 | 7   | 5   | 0.00 | 0.00 |
| TRBV |    |    |      |      |     |     |      |      |
| 7-6  | 1  | 0  | 0.00 | 0.00 | 3   | 6   | 0.00 | 0.00 |
| TRBV |    |    |      |      |     |     |      |      |
| 7-8  | 5  | 3  | 0.01 | 0.01 | 63  | 38  | 0.02 | 0.01 |
| TRBV |    |    |      |      |     |     |      |      |
| 7-9  | 20 | 11 | 0.06 | 0.04 | 150 | 124 | 0.04 | 0.04 |
| TRBV |    |    |      |      |     |     |      |      |
| 9    | 20 | 17 | 0.06 | 0.06 | 171 | 186 | 0.05 | 0.06 |
| TRBV |    |    |      |      |     |     |      |      |
| 11-3 | 0  | 0  | 0.00 | 0.00 | 19  | 67  | 0.01 | 0.02 |
| TRBV |    |    |      |      |     |     |      |      |
| 12-4 | 0  | 0  | 0.00 | 0.00 | 1   | 0   | 0.00 | 0.00 |
| TRBV |    |    |      |      |     |     |      |      |
| 12-3 | 0  | 0  | 0.00 | 0.00 | 0   | 0   | 0.00 | 0.00 |
| TRBV |    |    |      |      |     |     |      |      |
| 5-5  | 0  | 0  | 0.00 | 0.00 | 1   | 2   | 0.00 | 0.00 |
| TRBV |    |    |      |      |     |     |      |      |
| 6-3  | 0  | 0  | 0.00 | 0.00 | 2   | 3   | 0.00 | 0.00 |
| TRBV |    |    |      |      |     |     |      |      |
| 6-2  | 0  | 0  | 0.00 | 0.00 | 0   | 0   | 0.00 | 0.00 |
| TRBV |    |    |      |      |     |     |      |      |
| 7-1  | 0  | 0  | 0.00 | 0.00 | 0   | 0   | 0.00 | 0.00 |
| TRBV |    |    |      |      |     |     |      |      |
| 7-7  | 0  | 0  | 0.00 | 0.00 | 1   | 2   | 0.00 | 0.00 |

Table 6.1: Additional PBMC Lymphotrack vs CapTCR-Seq VJ rearrangement counts and proportions (MiXCR) for sample H128

| V-Gene   | H128-Cap-TRBJ1 | H128-Cap-TRBJ2 | H128-PCR-TRBJ1 | H128-PCR-TRBJ2 | H128-PCR:Cap-TRBJ1 | H128-PCR:Cap-TRBJ2 |
|----------|----------------|----------------|----------------|----------------|--------------------|--------------------|
| TRBV10-1 | 0.001574803    | 0.004918033    | 0.006918664    | 0.005820557    | 4.393351333        | 1.183513155        |
| TRBV10-2 | 0              | 0.001639344    | 0.001349983    | 0.001561613    | #DIV/0!            | 0.952583759        |
| TRBV10-3 | 0.015748031    | 0.02295082     | 0.016537293    | 0.016183986    | 1.050118124        | 0.705159406        |
| TRBV11-1 | 0              | 0.001639344    | 0.003881201    | 0.006246451    | #DIV/0!            | 3.810335037        |
| TRBV11-2 | 0.001574803    | 0.008196721    | 0.022105974    | 0.029244747    | 14.03729328        | 3.567859171        |
| TRBV12-5 | 0.011023622    | 0.008196721    | 0.005906176    | 0.020159001    | 0.535774553        | 2.459398069        |
| TRBV11-3 | 0.001574803    | 0.004918033    | 0.018224772    | 0.024701874    | 11.57273034        | 5.022714367        |
| TRBV13   | 0.004724409    | 0.008196721    | 0.006074924    | 0.005252697    | 1.285858927        | 0.640829074        |
| TRBV14   | 0.023622047    | 0.026229508    | 0.017549781    | 0.024134015    | 0.742940713        | 0.920109313        |
| TRBV15   | 0.003149606    | 0.016393443    | 0.012656092    | 0.018171493    | 4.018309146        | 1.108461102        |
| TRBV16   | 0.001574803    | 0.001639344    | 0.001518731    | 0.000993754    | 0.964394195        | 0.606189665        |
| TRBV18   | 0.028346457    | 0.02295082     | 0.032230847    | 0.023282226    | 1.137032662        | 1.014439847        |
| TRBV19   | 0.092913386    | 0.086885246    | 0.089436382    | 0.063884157    | 0.96257801         | 0.735270483        |
| TRBV2    | 0.064566929    | 0.054098361    | 0.043368208    | 0.029386712    | 0.671678342        | 0.543208921        |
| TRBV20-1 | 0.108661417    | 0.11147541     | 0.072561593    | 0.107467348    | 0.667776979        | 0.964045329        |
| TRBV21-1 | 0.031496063    | 0.024590164    | 0              | 0              | 0                  | 0                  |
| TRBV23-1 | 0.006299213    | 0.006557377    | 0.004724941    | 0.006672345    | 0.750084374        | 1.017532652        |
| TRBV24-1 | 0.018897638    | 0.032786885    | 0.013668579    | 0.02399205     | 0.723295646        | 0.731757524        |
| TRBV25-1 | 0.020472441    | 0.009836066    | 0.016537293    | 0.010647359    | 0.807783172        | 1.082481545        |
| TRBV27   | 0.040944882    | 0.049180328    | 0.039487006    | 0.0379046      | 0.964394195        | 0.77072686         |
| TRBV28   | 0.091338583    | 0.032786885    | 0.059061762    | 0.0379046      | 0.64662446         | 1.15609029         |
| TRBV29-1 | 0.031496063    | 0.042622951    | 0.02716841     | 0.027683135    | 0.86259703         | 0.649488927        |
| TRBV3-1  | 0.011023622    | 0.003278689    | 0.015356058    | 0.012208972    | 1.393013837        | 3.723736513        |
| TRBV30   | 0.058267717    | 0.037704918    | 0.044380695    | 0.022288472    | 0.761668689        | 0.591129052        |
| TRBV4-1  | 0.004724409    | 0.009836066    | 0.011643604    | 0.01362862     | 2.464562943        | 1.385576377        |
| TRBV4-2  | 0.003149606    | 0.001639344    | 0.009956126    | 0.011641113    | 3.161069862        | 7.101078932        |
| TRBV4-3  | 0              | 0.001639344    | 0.007762403    | 0.010647359    | #DIV/0!            | 6.494889267        |
| TRBV5-1  | 0.056692913    | 0.093442623    | 0.069186635    | 0.078648495    | 1.22037537         | 0.841676878        |
| TRBV5-4  | 0.012598425    | 0.01147541     | 0.023455957    | 0.027115275    | 1.861816571        | 2.362902572        |
| TRBV5-5  | 0              | 0              | 0.001181235    | 0.000851789    | #DIV/0!            | #DIV/0!            |
| TRBV5-6  | 0.004724409    | 0.004918033    | 0.016368545    | 0.014764338    | 3.464675442        | 3.00208215         |
| TRBV5-8  | 0.001574803    | 0              | 0.007087411    | 0.005252697    | 4.500506244        | #DIV/0!            |
| TRBV6-1  | 0.053543307    | 0.032786885    | 0.056530543    | 0.03762067     | 1.055791031        | 1.147430437        |
| TRBV6-4  | 0.014173228    | 0.01147541     | 0.012993588    | 0.012492902    | 0.91676979         | 1.088667153        |
| TRBV6-6  | 0.011023622    | 0.004918033    | 0.02480594     | 0.01717774     | 2.250253122        | 3.492807117        |
| TRBV6-5  | 0.028346457    | 0.014754098    | 0.038643267    | 0.031516184    | 1.363248584        | 2.136096915        |
| TRBV6-7  | 0              | 0              | 0.001012487    | 0.001561613    | #DIV/0!            | #DIV/0!            |
| TRBV7-1  | 0              | 0              | 0              | 0              | #DIV/0!            | #DIV/0!            |
| TRBV7-2  | 0.017322835    | 0.009836066    | 0.035774553    | 0.038614424    | 2.065167367        | 3.925799735        |

|          |             |             |             |             |             |             |
|----------|-------------|-------------|-------------|-------------|-------------|-------------|
| TRBV7-3  | 0.006299213 | 0.029508197 | 0.014681066 | 0.026973311 | 2.330619305 | 0.914095527 |
| TRBV7-4  | 0           | 0           | 0.002531218 | 0.002413401 | #DIV/0!     | #DIV/0!     |
| TRBV7-6  | 0.004724409 | 0           | 0.001181235 | 0.000141965 | 0.250028125 | #DIV/0!     |
| TRBV7-7  | 0.001574803 | 0.003278689 | 0.000674992 | 0.001135718 | 0.428619642 | 0.346394094 |
| TRBV7-8  | 0.017322835 | 0.009836066 | 0.01518731  | 0.017319705 | 0.876721996 | 1.760836646 |
| TRBV7-9  | 0.053543307 | 0.055737705 | 0.040668242 | 0.043015332 | 0.759539219 | 0.771745666 |
| TRBV9    | 0.039370079 | 0.085245902 | 0.036955788 | 0.05124929  | 0.938677017 | 0.601193596 |
| TRBV12-4 | 0           | 0           | 0.000843739 | 0.00028393  | #DIV/0!     | #DIV/0!     |
| TRBV12-3 | 0           | 0           | 0           | 0           | #DIV/0!     | #DIV/0!     |
| TRBV6-3  | 0           | 0           | 0.000168748 | 0.000141965 | #DIV/0!     | #DIV/0!     |

Table 6.2: Additional PBMC Lymphotrack vs CapTCR-Seq VJ rearrangement counts and proportions (MiXCR) for sample H129

| V-Gene   | H129-Cap-TRBJ1 | H129-Cap-TRBJ2 | H129-PCR-TRBJ1 | H129-PCR-TRBJ2 | H129-PCR:Cap-TRBJ1 | H129-PCR:Cap-TRBJ2 |
|----------|----------------|----------------|----------------|----------------|--------------------|--------------------|
| TRBV10-1 | 0.010822511    | 0.019148936    | 0.008981425    | 0.008946878    | 0.82988365         | 0.467225847        |
| TRBV10-2 | 0              | 0.004255319    | 0.003470096    | 0.003168686    | #DIV/0!            | 0.744641193        |
| TRBV10-3 | 0.043290043    | 0.019148936    | 0.018371096    | 0.014911463    | 0.424372321        | 0.778709744        |
| TRBV11-1 | 0.004329004    | 0              | 0.004286589    | 0.005032619    | 0.990202082        | #DIV/0!            |
| TRBV11-2 | 0.002164502    | 0.004255319    | 0.024698918    | 0.02833178     | 11.41090018        | 6.657968313        |
| TRBV12-5 | 0.002164502    | 0              | 0.009185548    | 0.018266542    | 4.243723209        | #DIV/0!            |
| TRBV11-3 | 0              | 0.012765957    | 0.007552562    | 0.016029823    | #DIV/0!            | 1.255669463        |
| TRBV13   | 0.008658009    | 0.008510638    | 0.004490712    | 0.006523765    | 0.518677281        | 0.766542404        |
| TRBV14   | 0.012987013    | 0.027659574    | 0.01735048     | 0.021621622    | 1.335986936        | 0.781704782        |
| TRBV15   | 0.019480519    | 0.012765957    | 0.018575219    | 0.017707363    | 0.953527931        | 1.387076732        |
| TRBV16   | 0.004329004    | 0.00212766     | 0.001632986    | 0.000745573    | 0.377219841        | 0.350419385        |
| TRBV18   | 0.032467532    | 0.034042553    | 0.035517453    | 0.038024231    | 1.093937538        | 1.116961789        |
| TRBV19   | 0.097402597    | 0.082978723    | 0.065931823    | 0.044920783    | 0.676900048        | 0.541353024        |
| TRBV2    | 0.067099567    | 0.053191489    | 0.047560727    | 0.037278658    | 0.708808249        | 0.70083877         |
| TRBV20-1 | 0.119047619    | 0.144680851    | 0.091243111    | 0.118732526    | 0.766442131        | 0.82065128         |
| TRBV21-1 | 0.036796537    | 0.014893617    | 0              | 0              | 0                  | 0                  |
| TRBV23-1 | 0.004329004    | 0.006382979    | 0.009389671    | 0.005591799    | 2.169014085        | 0.876048462        |
| TRBV24-1 | 0.03030303     | 0.031914894    | 0.012655644    | 0.018639329    | 0.417636252        | 0.584032308        |
| TRBV25-1 | 0.004329004    | 0.008510638    | 0.015717493    | 0.012861137    | 3.630740968        | 1.511183597        |
| TRBV27   | 0.060606061    | 0.040425532    | 0.032047357    | 0.033178006    | 0.528781384        | 0.820719086        |
| TRBV28   | 0.071428571    | 0.046808511    | 0.057562768    | 0.031500466    | 0.805878751        | 0.672964501        |
| TRBV29-1 | 0.025974026    | 0.036170213    | 0.034496836    | 0.035228332    | 1.328128189        | 0.973959761        |
| TRBV3-1  | 0.008658009    | 0.004255319    | 0.008777301    | 0.008574091    | 1.013778322        | 2.014911463        |
| TRBV30   | 0.062770563    | 0.023404255    | 0.036538069    | 0.021062442    | 0.582089237        | 0.899940693        |
| TRBV4-1  | 0.004329004    | 0.004255319    | 0.020820576    | 0.020876048    | 4.80955297         | 4.905871389        |
| TRBV4-2  | 0              | 0.00212766     | 0.012859767    | 0.01584343     | #DIV/0!            | 7.446411929        |
| TRBV4-3  | 0.002164502    | 0.00212766     | 0.016533987    | 0.027586207    | 7.638701776        | 12.96551724        |
| TRBV5-1  | 0.071428571    | 0.09787234     | 0.067768932    | 0.076421249    | 0.948765054        | 0.780825803        |
| TRBV5-4  | 0.002164502    | 0.008510638    | 0.015105123    | 0.020316869    | 6.978567055        | 2.38723206         |
| TRBV5-5  | 0              | 0              | 0.000816493    | 0.000372787    | #DIV/0!            | #DIV/0!            |
| TRBV5-6  | 0.004329004    | 0.004255319    | 0.012247397    | 0.012115564    | 2.829148806        | 2.847157502        |
| TRBV5-8  | 0              | 0.00212766     | 0.011022658    | 0.005778192    | #DIV/0!            | 2.715750233        |
| TRBV6-1  | 0.019480519    | 0.017021277    | 0.027556644    | 0.017520969    | 1.414574403        | 1.029356943        |
| TRBV6-4  | 0.010822511    | 0.025531915    | 0.014901       | 0.017148183    | 1.376852419        | 0.671637154        |
| TRBV6-6  | 0.019480519    | 0.006382979    | 0.020004082    | 0.014352283    | 1.026876233        | 2.248524386        |
| TRBV6-5  | 0.017316017    | 0.019148936    | 0.044090631    | 0.034296365    | 2.546233925        | 1.791032412        |
| TRBV6-7  | 0.002164502    | 0              | 0.000204123    | 0.000745573    | 0.09430496         | #DIV/0!            |
| TRBV7-1  | 0.006493506    | 0              | 0              | 0              | 0                  | #DIV/0!            |
| TRBV7-2  | 0.019480519    | 0.029787234    | 0.04960196     | 0.056290774    | 2.546233925        | 1.889761683        |

|          |             |             |             |             |             |             |
|----------|-------------|-------------|-------------|-------------|-------------|-------------|
| TRBV7-3  | 0.008658009 | 0.021276596 | 0.01796285  | 0.029263747 | 2.074709124 | 1.375396086 |
| TRBV7-4  | 0           | 0.004255319 | 0.00183711  | 0.00111836  | #DIV/0!     | 0.262814539 |
| TRBV7-6  | 0           | 0           | 0.000408247 | 0.000931966 | #DIV/0!     | #DIV/0!     |
| TRBV7-7  | 0           | 0           | 0.000408247 | 0.000186393 | #DIV/0!     | #DIV/0!     |
| TRBV7-8  | 0.010822511 | 0.010638298 | 0.019799959 | 0.019384902 | 1.829516228 | 1.822180801 |
| TRBV7-9  | 0.036796537 | 0.042553191 | 0.045723617 | 0.035228332 | 1.242606534 | 0.827865797 |
| TRBV9    | 0.034632035 | 0.063829787 | 0.033272096 | 0.046598322 | 0.960731782 | 0.730040385 |
| TRBV12-4 | 0           | 0           | 0.00061237  | 0.000186393 | #DIV/0!     | #DIV/0!     |
| TRBV12-3 | 0           | 0           | 0           | 0           | #DIV/0!     | #DIV/0!     |
| TRBV6-3  | 0           | 0           | 0.000408247 | 0.00055918  | #DIV/0!     | #DIV/0!     |

Table 6.3: Additional PBMC Lymphotrack vs CapTCR-Seq VJ rearrangement counts and proportions (MiXCR) for sample H130

| V-Gene   | H130-Cap-TRBJ1 | H130-Cap-TRBJ2 | H130-PCR-TRBJ1 | H130-PCR-TRBJ2 | H130-PCR:Cap-TRBJ1 | H130-PCR:Cap-TRBJ2 |
|----------|----------------|----------------|----------------|----------------|--------------------|--------------------|
| TRBV10-1 | 0.008532423    | 0.00896861     | 0.006614039    | 0.007214206    | 0.775165351        | 0.804384018        |
| TRBV10-2 | 0.003412969    | 0.006726457    | 0.003627054    | 0.001664817    | 1.062726691        | 0.247502775        |
| TRBV10-3 | 0.0221843      | 0.031390135    | 0.017921912    | 0.013041065    | 0.807864634        | 0.415451086        |
| TRBV11-1 | 0.001706485    | 0.002242152    | 0.004053766    | 0.00554939     | 2.375506721        | 2.475027747        |
| TRBV11-2 | 0.005119454    | 0.006726457    | 0.019842116    | 0.016925638    | 3.875826755        | 2.516278209        |
| TRBV12-5 | 0              | 0.006726457    | 0.00981438     | 0.019700333    | #DIV/0!            | 2.928782834        |
| TRBV11-3 | 0.001706485    | 0.006726457    | 0.007467463    | 0.016648169    | 4.375933433        | 2.475027747        |
| TRBV13   | 0.005119454    | 0.00896861     | 0.004267122    | 0.006936737    | 0.83351113         | 0.773446171        |
| TRBV14   | 0.020477816    | 0.033632287    | 0.01856198     | 0.017480577    | 0.906443354        | 0.519755827        |
| TRBV15   | 0.029010239    | 0.029147982    | 0.016855131    | 0.016925638    | 0.581006288        | 0.580679587        |
| TRBV16   | 0.001706485    | 0              | 0.000640068    | 0.000277469    | 0.375080009        | #DIV/0!            |
| TRBV18   | 0.04778157     | 0.02690583     | 0.039684233    | 0.038290788    | 0.830534305        | 1.423140954        |
| TRBV19   | 0.097269625    | 0.080717489    | 0.06165991     | 0.055771365    | 0.633907149        | 0.690945246        |
| TRBV2    | 0.054607509    | 0.035874439    | 0.050352038    | 0.038013319    | 0.922071688        | 1.059621254        |
| TRBV20-1 | 0.138225256    | 0.109865471    | 0.101130787    | 0.101553829    | 0.731637548        | 0.924347097        |
| TRBV21-1 | 0.027303754    | 0.033632287    | 0              | 0              | 0                  | 0                  |
| TRBV23-1 | 0.011945392    | 0.004484305    | 0.005333902    | 0.006936737    | 0.44652382         | 1.546892342        |
| TRBV24-1 | 0.0221843      | 0.024663677    | 0.011094517    | 0.020532741    | 0.500106678        | 0.832509333        |
| TRBV25-1 | 0.006825939    | 0.004484305    | 0.013014722    | 0.008046615    | 1.90665671         | 1.794395117        |
| TRBV27   | 0.035836177    | 0.047085202    | 0.024109238    | 0.027469478    | 0.672762555        | 0.583399397        |
| TRBV28   | 0.064846416    | 0.053811659    | 0.055259228    | 0.052441731    | 0.852155458        | 0.974542175        |
| TRBV29-1 | 0.035836177    | 0.044843049    | 0.026456155    | 0.029689234    | 0.738252715        | 0.662069922        |
| TRBV3-1  | 0.003412969    | 0.006726457    | 0.013014722    | 0.014983352    | 3.81331342         | 2.227524972        |
| TRBV30   | 0.034129693    | 0.02690583     | 0.036270536    | 0.018867925    | 1.062726691        | 0.701257862        |
| TRBV4-1  | 0.0221843      | 0.015695067    | 0.02837636     | 0.028024417    | 1.279119003        | 1.785555732        |
| TRBV4-2  | 0.003412969    | 0              | 0.013441434    | 0.022752497    | 3.93834009         | #DIV/0!            |
| TRBV4-3  | 0.005119454    | 0.006726457    | 0.02240239     | 0.023862375    | 4.375933433        | 3.547539771        |
| TRBV5-1  | 0.061433447    | 0.060538117    | 0.052698955    | 0.065760266    | 0.857821871        | 1.086262178        |
| TRBV5-4  | 0.005119454    | 0.011210762    | 0.019842116    | 0.016370699    | 3.875826755        | 1.460266371        |
| TRBV5-5  | 0              | 0.002242152    | 0.000640068    | 0.000554939    | #DIV/0!            | 0.247502775        |
| TRBV5-6  | 0.003412969    | 0              | 0.019202048    | 0.013318535    | 5.626200128        | #DIV/0!            |
| TRBV5-8  | 0.003412969    | 0.002242152    | 0.013014722    | 0.008879023    | 3.81331342         | 3.960044395        |
| TRBV6-1  | 0.011945392    | 0.015695067    | 0.032430126    | 0.024694784    | 2.714864824        | 1.573410496        |
| TRBV6-4  | 0.008532423    | 0.015695067    | 0.011947941    | 0.014150943    | 1.400298699        | 0.901617251        |
| TRBV6-6  | 0.011945392    | 0.004484305    | 0.019202048    | 0.014983352    | 1.607485751        | 3.341287458        |
| TRBV6-5  | 0.018771331    | 0.015695067    | 0.039470877    | 0.034406215    | 2.10272126         | 2.192167433        |
| TRBV6-7  | 0              | 0.002242152    | 0.000853424    | 0.001942286    | #DIV/0!            | 0.866259711        |
| TRBV7-1  | 0              | 0              | 0              | 0              | #DIV/0!            | #DIV/0!            |
| TRBV7-2  | 0.039249147    | 0.047085202    | 0.055259228    | 0.062708102    | 1.407909018        | 1.331800645        |

|          |             |             |             |             |             |             |
|----------|-------------|-------------|-------------|-------------|-------------|-------------|
| TRBV7-3  | 0.015358362 | 0.031390135 | 0.016855131 | 0.028579356 | 1.097456321 | 0.910456635 |
| TRBV7-4  | 0.005119454 | 0           | 0.002133561 | 0.001942286 | 0.416755565 | #DIV/0!     |
| TRBV7-6  | 0.001706485 | 0.004484305 | 0.000426712 | 0.001109878 | 0.250053339 | 0.247502775 |
| TRBV7-7  | 0.001706485 | 0.002242152 | 0.000213356 | 0.000554939 | 0.12502667  | 0.247502775 |
| TRBV7-8  | 0.013651877 | 0.013452915 | 0.018988692 | 0.018035516 | 1.390921698 | 1.34064003  |
| TRBV7-9  | 0.04778157  | 0.060538117 | 0.046084916 | 0.036625971 | 0.964491451 | 0.605006783 |
| TRBV9    | 0.040955631 | 0.047085202 | 0.038617453 | 0.044395117 | 0.942909466 | 0.942867713 |
| TRBV12-4 | 0           | 0           | 0.000640068 | 0.000277469 | #DIV/0!     | #DIV/0!     |
| TRBV12-3 | 0           | 0           | 0           | 0           | #DIV/0!     | #DIV/0!     |
| TRBV6-3  | 0           | 0           | 0.000213356 | 0.001109878 | #DIV/0!     | #DIV/0!     |

Table 6.4: Additional PBMC Lymphotrack vs CapTCR-Seq VJ rearrangement counts and proportions (MiXCR) for sample H131

| V-Gene   | H131-Cap-TRBJ1 | H131-Cap-TRBJ2 | H131-PCR-TRBJ1 | H131-PCR-TRBJ2 | H131-PCR:Cap-TRBJ1 | H131-PCR:Cap-TRBJ2 |
|----------|----------------|----------------|----------------|----------------|--------------------|--------------------|
| TRBV10-1 | 0.006263048    | 0.009677419    | 0.009836852    | 0.007963989    | 1.570617402        | 0.822945522        |
| TRBV10-2 | 0.006263048    | 0.006451613    | 0.003598848    | 0.008310249    | 0.574616123        | 1.288088643        |
| TRBV10-3 | 0.03131524     | 0.029032258    | 0.019433781    | 0.024238227    | 0.620585413        | 0.834872268        |
| TRBV11-1 | 0              | 0              | 0.002639155    | 0.004155125    | #DIV/0!            | #DIV/0!            |
| TRBV11-2 | 0.012526096    | 0.006451613    | 0.02831094     | 0.025277008    | 2.26015675         | 3.917936288        |
| TRBV12-5 | 0.006263048    | 0.003225806    | 0.008637236    | 0.021468144    | 1.379078695        | 6.655124654        |
| TRBV11-3 | 0              | 0.003225806    | 0.010796545    | 0.018351801    | #DIV/0!            | 5.689058172        |
| TRBV13   | 0.004175365    | 0.009677419    | 0.003598848    | 0.007271468    | 0.861924184        | 0.751385042        |
| TRBV14   | 0.012526096    | 0.019354839    | 0.020873321    | 0.019736842    | 1.666386756        | 1.019736842        |
| TRBV15   | 0.035490605    | 0.019354839    | 0.017514395    | 0.017313019    | 0.493493847        | 0.894506002        |
| TRBV16   | 0.002087683    | 0              | 0.002399232    | 0.000692521    | 1.149232246        | #DIV/0!            |
| TRBV18   | 0.043841336    | 0.061290323    | 0.029510557    | 0.036703601    | 0.673121744        | 0.598848229        |
| TRBV19   | 0.108559499    | 0.070967742    | 0.060940499    | 0.055401662    | 0.561355751        | 0.780659783        |
| TRBV2    | 0.043841336    | 0.029032258    | 0.035988484    | 0.020775623    | 0.820880175        | 0.715604801        |
| TRBV20-1 | 0.158663883    | 0.151612903    | 0.114443378    | 0.10699446     | 0.721294449        | 0.705708139        |
| TRBV21-1 | 0.018789144    | 0.019354839    | 0              | 0.000692521    | 0                  | 0.03578024         |
| TRBV23-1 | 0.010438413    | 0.019354839    | 0.00743762     | 0.004501385    | 0.712523992        | 0.23257156         |
| TRBV24-1 | 0.022964509    | 0.009677419    | 0.009836852    | 0.019044321    | 0.428350201        | 1.967913204        |
| TRBV25-1 | 0.010438413    | 0.006451613    | 0.010796545    | 0.00900277     | 1.034309021        | 1.395429363        |
| TRBV27   | 0.060542797    | 0.041935484    | 0.038387716    | 0.03601108     | 0.63405917         | 0.858725762        |
| TRBV28   | 0.060542797    | 0.041935484    | 0.0506238      | 0.033933518    | 0.83616553         | 0.809183891        |
| TRBV29-1 | 0.029227557    | 0.029032258    | 0.030950096    | 0.029432133    | 1.058935426        | 1.013773469        |
| TRBV3-1  | 0              | 0.012903226    | 0.011516315    | 0.007271468    | #DIV/0!            | 0.563538781        |
| TRBV30   | 0.025052192    | 0.022580645    | 0.02231286     | 0.010734072    | 0.89065499         | 0.475366047        |
| TRBV4-1  | 0.010438413    | 0.006451613    | 0.024472169    | 0.024238227    | 2.344433781        | 3.756925208        |
| TRBV4-2  | 0.002087683    | 0.012903226    | 0.007917466    | 0.013157895    | 3.792466411        | 1.019736842        |
| TRBV4-3  | 0              | 0.003225806    | 0.02303263     | 0.029432133    | #DIV/0!            | 9.123961219        |
| TRBV5-1  | 0.052192067    | 0.05483871     | 0.050863724    | 0.065443213    | 0.974548944        | 1.193376242        |
| TRBV5-4  | 0.002087683    | 0.009677419    | 0.01559501     | 0.015927978    | 7.470009597        | 1.645891043        |
| TRBV5-5  | 0              | 0.003225806    | 0.00071977     | 0.00034626     | #DIV/0!            | 0.10734072         |
| TRBV5-6  | 0.006263048    | 0.003225806    | 0.019673704    | 0.013850416    | 3.141234805        | 4.293628809        |
| TRBV5-8  | 0              | 0.006451613    | 0.011036468    | 0.007963989    | #DIV/0!            | 1.234418283        |
| TRBV6-1  | 0.014613779    | 0.022580645    | 0.025191939    | 0.023545706    | 1.723848369        | 1.042738425        |
| TRBV6-4  | 0.010438413    | 0.016129032    | 0.012236084    | 0.021814404    | 1.172216891        | 1.352493075        |
| TRBV6-6  | 0.006263048    | 0.006451613    | 0.021113244    | 0.019044321    | 3.371081254        | 2.951869806        |
| TRBV6-5  | 0.022964509    | 0.025806452    | 0.053262956    | 0.031163435    | 2.319359623        | 1.207583102        |
| TRBV6-7  | 0              | 0.003225806    | 0.000479846    | 0.000692521    | #DIV/0!            | 0.21468144         |
| TRBV7-1  | 0              | 0.003225806    | 0              | 0              | #DIV/0!            | 0                  |
| TRBV7-2  | 0.025052192    | 0.038709677    | 0.057101727    | 0.065789474    | 2.279310621        | 1.699561404        |

|          |             |             |             |             |             |             |
|----------|-------------|-------------|-------------|-------------|-------------|-------------|
| TRBV7-3  | 0.014613779 | 0.029032258 | 0.01487524  | 0.025623269 | 1.017891418 | 0.882579255 |
| TRBV7-4  | 0           | 0           | 0.001919386 | 0.002077562 | #DIV/0!     | #DIV/0!     |
| TRBV7-6  | 0.004175365 | 0           | 0.00071977  | 0           | 0.172384837 | #DIV/0!     |
| TRBV7-7  | 0           | 0.003225806 | 0.000239923 | 0           | #DIV/0!     | 0           |
| TRBV7-8  | 0.012526096 | 0.019354839 | 0.016794626 | 0.022160665 | 1.340770953 | 1.144967682 |
| TRBV7-9  | 0.052192067 | 0.05483871  | 0.049664107 | 0.037396122 | 0.951564299 | 0.681929281 |
| TRBV9    | 0.054279749 | 0.051612903 | 0.041506718 | 0.054709141 | 0.764681456 | 1.059989612 |
| TRBV12-4 | 0           | 0           | 0.000479846 | 0.00034626  | #DIV/0!     | #DIV/0!     |
| TRBV12-3 | 0           | 0           | 0           | 0           | #DIV/0!     | #DIV/0!     |
| TRBV6-3  | 0           | 0.003225806 | 0.00071977  | 0           | #DIV/0!     | 0           |

Table 6.5: Additional PBMC Lymphotrack vs CapTCR-Seq VJ rearrangement counts and proportions (MiXCR) for sample H132

| V-Gene   | H132-Cap-TRBJ1 | H132-Cap-TRBJ2 | H132-PCR-TRBJ1 | H132-PCR-TRBJ2 | H132-PCR:Cap-TRBJ1 | H132-PCR:Cap-TRBJ2 |
|----------|----------------|----------------|----------------|----------------|--------------------|--------------------|
| TRBV10-1 | 0.00887574     | 0.008517888    | 0.010612639    | 0.014319809    | 1.195690626        | 1.681145585        |
| TRBV10-2 | 0.01035503     | 0.008517888    | 0.0065927      | 0.005114218    | 0.636666437        | 0.600409137        |
| TRBV10-3 | 0.029585799    | 0.04088586     | 0.02106448     | 0.016365496    | 0.711979418        | 0.400272758        |
| TRBV11-1 | 0.00147929     | 0              | 0.001607976    | 0.002216161    | 1.086991478        | #DIV/0!            |
| TRBV11-2 | 0.00591716     | 0.005110733    | 0.021386075    | 0.024036822    | 3.614246663        | 4.70320491         |
| TRBV12-5 | 0.00887574     | 0              | 0.005306319    | 0.019093079    | 0.597845313        | #DIV/0!            |
| TRBV11-3 | 0.00147929     | 0.008517888    | 0.009004663    | 0.024548244    | 6.087152275        | 2.88196386         |
| TRBV13   | 0.00739645     | 0.010221465    | 0.005145522    | 0.006648483    | 0.695674546        | 0.650443232        |
| TRBV14   | 0.019230769    | 0.017035775    | 0.021386075    | 0.023695875    | 1.112075896        | 1.390947835        |
| TRBV15   | 0.026627219    | 0.02044293     | 0.025406014    | 0.019945448    | 0.954136964        | 0.975664848        |
| TRBV16   | 0              | 0.003407155    | 0.001768773    | 0.00085237     | #DIV/0!            | 0.250170474        |
| TRBV18   | 0.035502959    | 0.02725724     | 0.041968162    | 0.02829867     | 1.182103232        | 1.038207467        |
| TRBV19   | 0.087278107    | 0.06132879     | 0.061585464    | 0.048073645    | 0.705623281        | 0.783867485        |
| TRBV2    | 0.038461538    | 0.04770017     | 0.045344911    | 0.035288101    | 1.17896768         | 0.73978983         |
| TRBV20-1 | 0.112426036    | 0.165247019    | 0.093905773    | 0.120866008    | 0.835267136        | 0.731426252        |
| TRBV21-1 | 0.013313609    | 0.032367973    | 0              | 0.000170474    | 0                  | 0.005266747        |
| TRBV23-1 | 0.00591716     | 0.00681431     | 0.0065927      | 0.005114218    | 1.114166265        | 0.750511422        |
| TRBV24-1 | 0.031065089    | 0.025553663    | 0.017044541    | 0.026252983    | 0.548671889        | 1.027366746        |
| TRBV25-1 | 0.017751479    | 0.01362862     | 0.009165461    | 0.012444596    | 0.516320952        | 0.91312223         |
| TRBV27   | 0.051775148    | 0.02725724     | 0.034571475    | 0.040402318    | 0.667723336        | 1.482260058        |
| TRBV28   | 0.088757396    | 0.098807496    | 0.0657662      | 0.048926014    | 0.740965857        | 0.495165007        |
| TRBV29-1 | 0.023668639    | 0.030664395    | 0.026531597    | 0.02437777     | 1.120959961        | 0.794986173        |
| TRBV3-1  | 0.016272189    | 0.00681431     | 0.01575816     | 0.017047392    | 0.968410589        | 2.501704739        |
| TRBV30   | 0.041420118    | 0.023850085    | 0.036340248    | 0.024889192    | 0.877357407        | 1.043568263        |
| TRBV4-1  | 0.016272189    | 0.00681431     | 0.02894356     | 0.025571088    | 1.778713327        | 3.752557109        |
| TRBV4-2  | 0              | 0.003407155    | 0.0065927      | 0.006648483    | #DIV/0!            | 1.951329697        |
| TRBV4-3  | 0.00443787     | 0.003407155    | 0.014793375    | 0.016195022    | 3.333440532        | 4.753239004        |
| TRBV5-1  | 0.066568047    | 0.066439523    | 0.056118347    | 0.068019093    | 0.843022279        | 1.023774555        |
| TRBV5-4  | 0.01183432     | 0.003407155    | 0.023315646    | 0.022843505    | 1.970172053        | 6.704568701        |
| TRBV5-5  | 0              | 0.001703578    | 0.000803988    | 0.000170474    | #DIV/0!            | 0.10006819         |
| TRBV5-6  | 0.00591716     | 0.005110733    | 0.018813314    | 0.0156836      | 3.179450072        | 3.068757813        |
| TRBV5-8  | 0.01035503     | 0.003407155    | 0.009808651    | 0.009205592    | 0.947235431        | 2.701841118        |
| TRBV6-1  | 0.026627219    | 0.035775128    | 0.037787426    | 0.03221957     | 1.419127763        | 0.900613706        |
| TRBV6-4  | 0.016272189    | 0.059625213    | 0.025245216    | 0.042618479    | 1.551433291        | 0.714772783        |
| TRBV6-6  | 0.00739645     | 0.008517888    | 0.014632578    | 0.013808387    | 1.978324489        | 1.621104671        |
| TRBV6-5  | 0.028106509    | 0.017035775    | 0.04341534     | 0.032560518    | 1.5446721          | 1.911302421        |
| TRBV6-7  | 0.00147929     | 0              | 0.00128638     | 0.001534265    | 0.869593182        | #DIV/0!            |
| TRBV7-1  | 0              | 0.001703578    | 0              | 0              | #DIV/0!            | 0                  |
| TRBV7-2  | 0.026627219    | 0.01362862     | 0.038430616    | 0.034435731    | 1.443283129        | 2.526721787        |

|          |             |             |             |             |             |             |
|----------|-------------|-------------|-------------|-------------|-------------|-------------|
| TRBV7-3  | 0.00443787  | 0.010221465 | 0.008039878 | 0.009035118 | 1.811652463 | 0.883935675 |
| TRBV7-4  | 0           | 0           | 0.000803988 | 0.001022844 | #DIV/0!     | #DIV/0!     |
| TRBV7-6  | 0.00295858  | 0.001703578 | 0.000803988 | 0.000681896 | 0.271747869 | 0.400272758 |
| TRBV7-7  | 0           | 0.001703578 | 0.000321595 | 0.000681896 | #DIV/0!     | 0.400272758 |
| TRBV7-8  | 0.014792899 | 0.00681431  | 0.014632578 | 0.01261507  | 0.989162245 | 1.851261507 |
| TRBV7-9  | 0.034023669 | 0.018739353 | 0.046309696 | 0.037504262 | 1.361102372 | 2.001363791 |
| TRBV9    | 0.038461538 | 0.04088586  | 0.024441228 | 0.027616775 | 0.635471941 | 0.67546028  |
| TRBV12-4 | 0           | 0           | 0.000160798 | 0.000170474 | #DIV/0!     | #DIV/0!     |
| TRBV12-3 | 0           | 0           | 0           | 0           | #DIV/0!     | #DIV/0!     |
| TRBV6-3  | 0           | 0           | 0.00064319  | 0.000170474 | #DIV/0!     | #DIV/0!     |

Table 6.6: Additional PBMC Lymphotrack vs CapTCR-Seq VJ rearrangement counts and proportions (MiXCR) for sample H133

| V-Gene   | H133-Cap-TRBJ1 | H133-Cap-TRBJ2 | H133-PCR-TRBJ1 | H133-PCR-TRBJ2 | H133-PCR:Cap-TRBJ1 | H133-PCR:Cap-TRBJ2 |
|----------|----------------|----------------|----------------|----------------|--------------------|--------------------|
| TRBV10-1 | 0.013761468    | 0.018867925    | 0.008936243    | 0.010028871    | 0.649367016        | 0.531530163        |
| TRBV10-2 | 0.004587156    | 0.003537736    | 0.004811823    | 0.005014435    | 1.048977488        | 1.417413767        |
| TRBV10-3 | 0.027522936    | 0.030660377    | 0.020793951    | 0.018994074    | 0.755513548        | 0.619499024        |
| TRBV11-1 | 0.002293578    | 0              | 0.004639973    | 0.003950767    | 2.023028012        | #DIV/0!            |
| TRBV11-2 | 0.006880734    | 0.008254717    | 0.024918371    | 0.028415134    | 3.621469897        | 3.442290577        |
| TRBV12-5 | 0.001146789    | 0.003537736    | 0.006186663    | 0.023248746    | 5.394741364        | 6.571645647        |
| TRBV11-3 | 0.004587156    | 0.001179245    | 0.008764393    | 0.014891354    | 1.910637567        | 12.62786811        |
| TRBV13   | 0.006880734    | 0.005896226    | 0.006702183    | 0.006837867    | 0.974050524        | 1.159702173        |
| TRBV14   | 0.016055046    | 0.018867925    | 0.022340608    | 0.017626501    | 1.391500749        | 0.934204528        |
| TRBV15   | 0.028669725    | 0.017688679    | 0.017700636    | 0.017170643    | 0.617398178        | 0.970713671        |
| TRBV16   | 0.002293578    | 0.001179245    | 0.000515553    | 0.000455858    | 0.22478089         | 0.386567391        |
| TRBV18   | 0.027522936    | 0.037735849    | 0.037291631    | 0.030542471    | 1.354929255        | 0.809375475        |
| TRBV19   | 0.095183486    | 0.067216981    | 0.058772985    | 0.045129919    | 0.617470397        | 0.671406521        |
| TRBV2    | 0.053899083    | 0.057783019    | 0.050867847    | 0.035708859    | 0.943760901        | 0.617981884        |
| TRBV20-1 | 0.135321101    | 0.149764151    | 0.107750473    | 0.127488224    | 0.79625773         | 0.85125995         |
| TRBV21-1 | 0.029816514    | 0.017688679    | 0.000171851    | 0              | 0.005763613        | 0                  |
| TRBV23-1 | 0.009174312    | 0.009433962    | 0.007045884    | 0.006989819    | 0.768001375        | 0.740920833        |
| TRBV24-1 | 0.014908257    | 0.033018868    | 0.013060663    | 0.019297979    | 0.87606911         | 0.584453079        |
| TRBV25-1 | 0.013761468    | 0.005896226    | 0.014091768    | 0.010940587    | 1.024001833        | 1.855523477        |
| TRBV27   | 0.047018349    | 0.04009434     | 0.031105001    | 0.031302234    | 0.661550262        | 0.780714535        |
| TRBV28   | 0.060779817    | 0.043632075    | 0.046056023    | 0.026743656    | 0.757751932        | 0.612935683        |
| TRBV29-1 | 0.025229358    | 0.04245283     | 0.038494587    | 0.039051816    | 1.525785436        | 0.919887217        |
| TRBV3-1  | 0.012614679    | 0.001179245    | 0.010139199    | 0.007141772    | 0.803761971        | 6.056222459        |
| TRBV30   | 0.04587156     | 0.02004717     | 0.035573123    | 0.02583194     | 0.775494071        | 1.28855797         |
| TRBV4-1  | 0.020642202    | 0.018867925    | 0.020450249    | 0.015499164    | 0.99070096         | 0.821455706        |
| TRBV4-2  | 0.001146789    | 0.001179245    | 0.01098453     | 0.012612065    | 9.590651315        | 10.69503115        |
| TRBV4-3  | 0.002293578    | 0.005896226    | 0.017872487    | 0.021577268    | 7.792404193        | 3.659504635        |
| TRBV5-1  | 0.069954128    | 0.076650943    | 0.061522598    | 0.07156967     | 0.879470587        | 0.933708929        |
| TRBV5-4  | 0.008027523    | 0.009433962    | 0.015122873    | 0.02112141     | 1.883877937        | 2.238869473        |
| TRBV5-5  | 0.001146789    | 0              | 0.000515553    | 0.000759763    | 0.44956178         | #DIV/0!            |
| TRBV5-6  | 0.001146789    | 0.010613208    | 0.009451796    | 0.009421061    | 8.241965974        | 0.887673268        |
| TRBV5-8  | 0.005733945    | 0.001179245    | 0.009623647    | 0.007749582    | 1.67836398         | 6.571645647        |
| TRBV6-1  | 0.026376147    | 0.017688679    | 0.028183537    | 0.017778453    | 1.068523652        | 1.005075217        |
| TRBV6-4  | 0.013761468    | 0.015330189    | 0.014091768    | 0.015347212    | 1.024001833        | 1.001110423        |
| TRBV6-6  | 0.010321101    | 0.008254717    | 0.0206221      | 0.012612065    | 1.998052357        | 1.527861593        |
| TRBV6-5  | 0.019495413    | 0.009433962    | 0.048461935    | 0.032669807    | 2.485812197        | 3.462999544        |
| TRBV6-7  | 0              | 0.002358491    | 0.000171851    | 0.001063668    | #DIV/0!            | 0.450995289        |
| TRBV7-1  | 0.001146789    | 0              | 0              | 0              | 0                  | #DIV/0!            |
| TRBV7-2  | 0.026376147    | 0.035377358    | 0.04949304     | 0.060629084    | 1.876431779        | 1.7137821          |

|          |             |             |             |             |             |             |
|----------|-------------|-------------|-------------|-------------|-------------|-------------|
| TRBV7-3  | 0.014908257 | 0.028301887 | 0.016325829 | 0.038444005 | 1.095086388 | 1.35835486  |
| TRBV7-4  | 0.001146789 | 0.004716981 | 0.002234061 | 0.001063668 | 1.948101048 | 0.225497645 |
| TRBV7-6  | 0           | 0.001179245 | 0.000171851 | 0.00060781  | #DIV/0!     | 0.515423188 |
| TRBV7-7  | 0           | 0.001179245 | 0.000171851 | 0.00060781  | #DIV/0!     | 0.515423188 |
| TRBV7-8  | 0.005733945 | 0.011792453 | 0.016669531 | 0.017322595 | 2.90716618  | 1.468956086 |
| TRBV7-9  | 0.052752294 | 0.045990566 | 0.043478261 | 0.037076432 | 0.824196597 | 0.80617473  |
| TRBV9    | 0.032110092 | 0.058962264 | 0.036604228 | 0.051056071 | 1.139960229 | 0.865910956 |
| TRBV12-4 | 0           | 0           | 0.000343702 | 0.000303905 | #DIV/0!     | #DIV/0!     |
| TRBV12-3 | 0           | 0           | 0           | 0           | #DIV/0!     | #DIV/0!     |
| TRBV6-3  | 0           | 0           | 0.000687403 | 0.000303905 | #DIV/0!     | #DIV/0!     |

Table 6.7: Average and median fractional prevalences of VJ rearrangements for additional PBMC Lymphotrack vs CapTCR-Seq samples

| V-Gene   | All-Average-PCR:Cap-TRBJ1 | All-Average-PCR:Cap-TRBJ2 | All-Median-PCR:Cap-TRBJ1 | All-Median-PCR:Cap-TRBJ2 |
|----------|---------------------------|---------------------------|--------------------------|--------------------------|
| TRBV10-1 | 1.569012563               | 0.915124048               | 1.012787138              | 0.81366477               |
| TRBV10-2 | 0.830746685               | 0.875106546               | 0.842821962              | 0.848612476              |
| TRBV10-3 | 0.728405576               | 0.625660715               | 0.733746483              | 0.662329215              |
| TRBV11-1 | 1.618932073               | 3.142681392               | 1.555009745              | 3.142681392              |
| TRBV11-2 | 6.469982256               | 4.134256245               | 3.748648326              | 3.74289773               |
| TRBV12-5 | 2.430232627               | 4.653737801               | 1.379078695              | 4.75021424               |
| TRBV11-3 | 5.986613404               | 4.992050285               | 5.231542854              | 3.952339113              |
| TRBV13   | 0.861616099               | 0.790391349               | 0.847717657              | 0.758963723              |
| TRBV14   | 1.192555734               | 0.927743188               | 1.224031416              | 0.927156921              |
| TRBV15   | 1.269645392               | 0.986183657               | 0.785463055              | 0.973189259              |
| TRBV16   | 0.618141436               | 0.414309177               | 0.377219841              | 0.386567391              |
| TRBV18   | 1.045276456               | 1.000162294               | 1.1154851                | 1.026323657              |
| TRBV19   | 0.692972439               | 0.700583757               | 0.655403598              | 0.713107865              |
| TRBV2    | 0.874361172               | 0.729507577               | 0.871475932              | 0.708221786              |
| TRBV20-1 | 0.753112662               | 0.832906341               | 0.749039839              | 0.835955615              |
| TRBV21-1 | 0.000960602               | 0.006841164               | 0                        | 0                        |
| TRBV23-1 | 0.993385652               | 0.860746212               | 0.759042874              | 0.813279942              |
| TRBV24-1 | 0.582354963               | 0.954672032               | 0.524389283              | 0.782133429              |
| TRBV25-1 | 1.486635443               | 1.425355888               | 1.029155427              | 1.45330648               |
| TRBV27   | 0.688211817               | 0.882757616               | 0.664636799              | 0.80071681               |
| TRBV28   | 0.773256998               | 0.786813591               | 0.781815341              | 0.741074196              |
| TRBV29-1 | 1.10577646                | 0.835694245               | 1.089947694              | 0.857436695              |
| TRBV3-1  | 1.598455628               | 2.847939821               | 1.013778322              | 2.364614856              |
| TRBV30   | 0.824998514               | 0.833303314               | 0.826425739              | 0.800599277              |
| TRBV4-1  | 2.277847164               | 2.73465692                | 2.061573554              | 2.76905642               |
| TRBV4-2  | 5.120631919               | 5.64271771                | 3.86540325               | 7.101078932              |
| TRBV4-3  | 5.785119983               | 6.757441856               | 6.007317604              | 5.624064136              |
| TRBV5-1  | 0.954000684               | 0.976604098               | 0.91411782               | 0.978741742              |
| TRBV5-4  | 4.006711661               | 2.799955037               | 2.922999404              | 2.300886022              |
| TRBV5-5  | 0.44956178                | 0.151637228               | 0.44956178               | 0.10734072               |
| TRBV5-6  | 4.413779204               | 2.819859909               | 3.322062757              | 3.00208215               |
| TRBV5-8  | 2.734854769               | 3.436739935               | 2.7458387                | 2.715750233              |
| TRBV6-1  | 1.566121673               | 1.116437537               | 1.416851083              | 1.036047684              |
| TRBV6-4  | 1.240262154               | 0.95504964                | 1.274534655              | 0.951363837              |
| TRBV6-6  | 2.038678868               | 2.530575839               | 1.988188423              | 2.600197096              |
| TRBV6-5  | 2.060341282               | 2.116863638               | 2.211040442              | 2.023699668              |
| TRBV6-7  | 0.481949071               | 0.51064548                | 0.481949071              | 0.450995289              |
| TRBV7-1  | 0                         | 0                         | 0                        | 0                        |
| TRBV7-2  | 1.936389306               | 2.181237892               | 1.970799573              | 1.801771891              |

|          |             |             |             |             |
|----------|-------------|-------------|-------------|-------------|
| TRBV7-3  | 1.571235836 | 1.05413634  | 1.454554392 | 0.912276081 |
| TRBV7-4  | 1.182428307 | 0.244156092 | 1.182428307 | 0.244156092 |
| TRBV7-6  | 0.236053542 | 0.387732907 | 0.250040732 | 0.400272758 |
| TRBV7-7  | 0.276823156 | 0.301918563 | 0.276823156 | 0.346394094 |
| TRBV7-8  | 1.555709883 | 1.564807125 | 1.365846326 | 1.614896366 |
| TRBV7-9  | 1.017250079 | 0.949014341 | 0.958027875 | 0.788960198 |
| TRBV9    | 0.897071982 | 0.81257709  | 0.940793241 | 0.79797567  |
| TRBV12-4 | 0           | 0           | 0           | 0           |
| TRBV12-3 | 0           | 0           | 0           | 0           |
| TRBV6-3  | 0           | 0           | 0           | 0           |

Table 7: Top 200 frequently observed clones across all samples (MiXCR/tcR)

| CDR3.nucleotide.sequence                                                                                                                               | V.gene      | Pe<br>op<br>le |
|--------------------------------------------------------------------------------------------------------------------------------------------------------|-------------|----------------|
| TGCGCCAGCAGCCAAGACACAGCCTTGCAGAGTACCCTTTCCTGTGCAGAAACCTTC                                                                                              | TRBV4-1     | 95             |
| TGTGCTCTAAGTGGCACAGTAGCTGGTTTT                                                                                                                         | TRAV16      | 93             |
| TGTGCTCTAAGTGGCACAGTAGCTGGTTTTGCAAGGAAGCAGAACACAAACCTTTAAATACAGGAAATATTTCTTT                                                                           | TRAV16      | 92             |
| TGTGCCAGCAGCTTAGGCACAGCCCTGGAGAATTACTGGCTTTCTGTACCCAAACCTCCTATCTCACTTGAGGATGTA<br>ATAG                                                                 | TRBV13      | 91             |
| TGTGCTGTGAGAGACACGGTGACTATGAGGCCTTTAGCTGCACCAAATTCAAAAGGCAACCACAGCAGCGAGAA<br>GCTGTATTT                                                                | TRAV1-2     | 90             |
| TGTGCCAGCAGTGAAGCCACAGCGCTGCATGGC                                                                                                                      | TRBV6-1     | 89             |
| TGTGCTCTGAGTGAGGCCACAGTGAGATGGGTGCCTGTGGGAGCCCTACAAAACTCAACAAGAGGCAGGGCTCC                                                                             | TRAV19      | 89             |
| TGGGGAGAGACTCTGTACAGACAGGAAGAAGCAAGGAGGGTCTGTGTCAGCACAGGTGGTTT                                                                                         | TRAV19      | 89             |
| TGTGCACTGAGAACACAGAACTCTCAGGCACCTGCAACCTGACTCAAACCTGCAACTGGGAGTCCAGTCACATTTCT<br>TTGTCTTT                                                              | TRAV32      | 88             |
| TGCGCCAGGGTCCCAGGGCTGTGCGAACCCGGGGAGCTGTTTTTT                                                                                                          | TRBV5-1     | 87             |
| TGCGCTCTGAGAGACAGAGTGGGA                                                                                                                               | TRAV18      | 87             |
| TGCGCTCTGAGAGACAGAGTGGGAGGGACTGCAGCGAGAGCCAGCACAAACCTGGGGAACGCAGGTGGGGCCT<br>GGGTGTGAGCCGCTTT                                                          | TRAV18      | 87             |
| TGTGCAGAGAATACACATTGCTTTCCAGGCATCTGTAACCATCACCCAAACCTGAGATGGGAGGTGAAGCAGCATCC<br>CTTTCTTT                                                              | TRAV13-2    | 87             |
| TGTGCTGTGAGAGACACGGTGACTATGAGGCCTTTAGCTGCACCAAATTCAAAAGGCAACCACAGCAGCGAGAA<br>GCTGTATTTCTGAGTGTATGCCTGCTGTGAGTTAAGACTGGGGACTTT                         | TRAV1-2     | 86             |
| TGTGCTTATAGGAGCGCACAGTGAGACAAGCAACAGGGAGAGGCTTACAGAAACCTCAGACCTCAGCATCTGT                                                                              | TRAV38-2DV8 | 86             |
| TGTGCTTTGAGTAGTGTCTCCCGACACCTGCAGCCTGTACCATAACCTGCAGCCGGGACCCTTGACACAGGCTAGC<br>CTTGCAAGT                                                              | TRAV11      | 86             |
| TGTGCTGGGCAGCACAGTGTCTCCCAACACCTGCAGCCTGACTCAAACCTGCAGCT                                                                                               | TRAV35      | 84             |
| TGTGCTGTGAGAGACACACTGATAGGGGCTGCAGGG                                                                                                                   | TRAV3       | 84             |
| TGTGCTGTGGAGGACACAGAGGCAGGGAACCCATGAAGAGCTGAACAGAAACAGAGATCACAGCCTTTGCAGGAG<br>GCAAAACAGAGATGAGCAATAACTTTT                                             | TRAV2       | 84             |
| TGTGTGGTGAACACACAGTGTCTCCCGACACCTGCAGTCTGTACCCAAACCTGCTGGGCCCCAGGAATGCCTGATGT<br>AGAGCTTAGACTGCAGGGCAGTAAAGTCTCTTT                                     | TRAV12-1    | 84             |
| TGCATCGTCAGAGTCGCACACTGGGACAGATGGGGCTGCACCTGTGCAATATCTCCCTGGTGCAAGTGAGGAGGA<br>GGGTAGCATTACCTAGAGCAAAATGTCGATAGGAGTCAAAAAGTAAACAAGAAAAGA               | TRAV26-1    | 83             |
| TGTGCTCTGAGTGACACAGTGACAGGGACTGCAG                                                                                                                     | TRAV9-1     | 83             |
| TGTGCTGGGCAGCACAGTGTCTCCCAACACCTGCAGCCTGACTCAAACCT                                                                                                     | TRAV35      | 83             |
| TGCATCCTGAGAGACCACAGT                                                                                                                                  | TRAV26-2    | 82             |
| TGTGCCGTGAATGCCACAGTGTCT                                                                                                                               | TRAV8-1     | 82             |
| TATGCCTTCAATGTGATTTTACCTTGACCCCTGTCACTGTGTGAACACTGAAGCTTTCTTT                                                                                          | TRBV26      | 81             |
| TGTGCAGCAAGCGCACAGTGTCTCCAGGCACCTGCAGCCCGTACTCAAACCTGCTTTGG                                                                                            | TRAV29DV5   | 81             |
| TGTGCTGTGAGTGACACAGTGCTGAGACTGCAGGAGAGCTGAACACAAACCTCCTGAGATGCTGAGACTTT                                                                                | TRAV8-6     | 81             |
| TGTGACAATAACAATGACATGCGCTTT                                                                                                                            | TRAV16      | 80             |
| TGTGCCAGCAGCTTTGCCACAGACTGCAGAATCTCCCATCTCTGTGCAGAAACCTGGTGCTTCTCTTCTCCCCAC<br>AGCTCTCAGCAGTGTGAGCAAAAGTCTTTCTGCTCTGCTCACCATGGCTCACGCCTATAATCCAGCACTTT | TRBV12-1    | 80             |
| TGTGTGAATAAATGCAGGCAACATGCTCACCTTT                                                                                                                     | TRAV16      | 80             |
| TGTTATGAAGCATCTCACAGTGTAAATACCGGCACTGCCAGTAAACTCACCTTT                                                                                                 | TRAV31      | 79             |
| TGTGCTGTGGAGGCACAGTGTCTCCCTAGTACCTGCAGCCTGACTCAAATTTCTACAGCTGAGGCTCTGCAACTGTAA<br>GATGGGGAACCTGCTACATT                                                 | TRAV36DV7   | 78             |
| TGTGCTTTACACAGTGTCTTCCAGGCACCTGCAGCCATACGCAAACTGTGTCTGGTGTGACTGTTACCAGCATT                                                                             | TRAV24      | 77             |
| TGTGCTGGGCAGCACAGTGTCTCCCAACACCTGCAGCCTGACTCAAACCTGCAGCTGGAACCTAGTCTCTATGCT<br>GCCCTCAGCTCTTAGTCTCTTGGCATGAAATGTGATTATGCATGCCACCTTT                    | TRAV35      | 77             |
| TGCCTGGTTTTTGTGAGCTTCTATCACAGTGGAACCCGGTAACCACTTCTATTTT                                                                                                | TRAV13-1    | 76             |

|                                                                                                                                                                             |           |    |
|-----------------------------------------------------------------------------------------------------------------------------------------------------------------------------|-----------|----|
| TGTGCTTTGAGGCACAGGGTCCCCAAGCACCTGCAGCCTGTACCACAACCTGCATCCGGGACCCTTGACACAGCCTTG<br>CCTTGACAGGTGGGAGTGAAGGTGTTGCTTT                                                           | TRAV15    | 76 |
| TGTGGCTGTGAGAATAGTGAGGTAGCAACTATAAACTGACATTT                                                                                                                                | TRAV3     | 76 |
| TGCGCTGTGAGAGACACAGTGACTATGAGGCCTCTTAACCTGTGCCAAAATTCAAAGACAATCAGTGGAGTACAGG<br>TGGGCTTGAGAAGTTCTAGAACTCCTGAGTGTATCTTT                                                      | TRAV1-1   | 75 |
| TGTGCTGTGGGTGACAGGAGGACTGTGCCT                                                                                                                                              | TRAV8-7   | 75 |
| TGTGCTTTGAGGCACAGGGTCCCCAAGCACCTGCAGCCTGTACCACAACCTGCATCCGGGACCCTTGACACAGCCTTG<br>CCTTGACAGGT                                                                               | TRAV15    | 75 |
| TGTGCCAGCAGCTTAACCACAGCATGACACAATCGCCTCCTTCTGCTCATAAACCTCCTCCTCTCTCCTTCTCCTT<br>ATGATACTATTTT                                                                               | TRBV7-3   | 74 |
| TGTGCAGCAAGTACACATTGCTTCCAGGCACCTGTACCCGTACACAAACCTGAGACTGGAGCTGAAGCTGCACCCC<br>CTTTCCTTTGTCATAGATCGTCAATTATAGCATTGTTCATATTGTTTGT                                           | TRAV13-1  | 73 |
| TGTACAGAGTTATGTCAGAGTGTGAACACAGGCTTTCAGAACTTGTATTT                                                                                                                          | TRAV13-2  | 72 |
| TGTGCTTTTACACAGTGCTGTTACAGGCACCTGCAGCCATACGCAAACCTGTGTCTGGTGTGCACTGTTACCAGCATT<br>GACAAAGAACCATGAGTAGGAT                                                                    | TRAV24    | 72 |
| TGTGCAGCAAGCGCACAGTGCTCTCCAGGCACCTGCAGCCGTAACCTGCTTT                                                                                                                        | TRAV29DV5 | 71 |
| TGTGCTGTAGATGCACAGTACTCCTAGGCACCTGCAACCTGTATCCAAACATGCAGCTGGGTAGAAGTACCATAACA<br>GAAGCATCAGCAATAGGGGCCCTGAGCCTGAGTAGACGTGAAGAACTAAGGCATGAGTATGACCAGAGAGG                    | TRAV7     | 71 |
| TGTGCTGTGCAGGCACAGCGTTCCCGAGGCACCTGCAACTGTATCAAACCTGCAGCTGAGGATCTGAAATGATG<br>GCAGAGGTATCTGCTGTTCTCCTTGAAGGAGTATTTATTTAATGCCAGGACCTTTTCCAAATGTCCTTT                         | TRAV20    | 71 |
| TTTGCTAGACTTTTTGTCTGGGCTTTGTCTAATAGGATCCCCGGAAGGACAGTGAAGTTTTTGTAAAGTTTTT<br>GTGCTGTGTGGATAGCAACTATCAGTTAATCTGG                                                             | TRAV6     | 71 |
| TGTGCAATGAGCGCACAGTGCTCCCGAGCACTGTACCTGTACCCAAACCTGCTGGGCCCCAGGAATGCCTGATGT<br>AGAGCTTAGACTGCAAGGCAATGAAGTTCTATTTGTTCTAGATGCAAATGAAAACAAAAGCAGTAGTATTGAAG<br>GTTTTGATTAATTT | TRAV12-3  | 70 |
| TGTGCCAGCTACCACCCACATTGATGCAGAGCCACATCCTCTCAGTCCACAAACATCCTCCAGACCTGCCTTGGAAAC<br>AGCGGT                                                                                    | TRBV18    | 70 |
| TGCTGTGGGAATAACAATGCCAGACTCATGTTT                                                                                                                                           | TRAV28    | 69 |
| TGTGACTACCTCAGGAACCTACAAATACATCTTT                                                                                                                                          | TRAV24    | 69 |
| TGTGATACTCACGGGAGGAGGAAACAACTCACCTTT                                                                                                                                        | TRAV34    | 69 |
| TGTGCTTTGCTCTAGACTTTTTGTCTGGGCTTTGTCTCTAATAGGATCCCCGGAAGGACAGTGAAGTTTTTGTAAAGG<br>TTTTTGTCTGTGTGGATAGCAACTATCAGTTAATCTGG                                                    | TRAV11    | 69 |
| TGGGAAGCAATGTGTACTTGTCTGCACAGAAGTAGACAGCCGAGTCTTCAGGTTGGGTCTCTGTGATGTGCAGGGAGA<br>AATGTTT                                                                                   | TRAV13-1  | 68 |
| TGTGCAGCAAGTACACATTGCTTCCAGGCACCTGTACCCGTACACAAACCTGAGACTGGAGCTGAAGCTGCACCCC<br>CTTTCCTTTGTCATAGATCGTCAATTATAGCATTGTTCATATTGTTTGTGCAAGTTGAACTAACATATTGACATTT                | TRAV13-1  | 68 |
| TATGCTGTGAGTGGTCTGATTTTCTCAGCATCTCTGGGTTTTTGCAAAGAAAGGAAACTCTGTGCATACTCTGGGGC<br>TGGGAGTTACCAACTCACTTC                                                                      | TRAV8-4   | 65 |
| TGCACAACTGGGCCCTGCGCAGCCTTGCATGTGCCCCAGCCCTACACAAAAGGACTCTTCTCCCGATCCAACAAG<br>GCCTTGGGCATTTTCACTTACTCT                                                                     | TRGVA     | 65 |
| TGTGCCAGCAGCTTAGCCACAGCATGGCACAGTTGCCTCCTTCTGTTACAAACCTCATCCTTCTCTCCTTGCAGCT<br>CCTAGAGACCCTAACACAGAGGCCTCTTTGCTCCTCACTTTTATGGGAAAGAAATTACATCTGGACTTCAGCTGTTCT<br>TT        | TRBV7-8   | 65 |
| TGTGCTGTGAGAGACACGGTACTATGAGGCCTTTAGCTGCACAAAATTCAAAGGCAACCACAGCAGCGAGAA<br>GCTGTATTTCTGAGTGTATGCCTGCTGTGAGTTAAGACTGG                                                       | TRAV1-2   | 65 |
| TGGTTTTGTAAAGGTGCCACTCCTGTGGGTACCGGGTTAATAGGAACTGACATTT                                                                                                                     | TRAV24    | 64 |
| TGTAAGTGGGTAGAACTGTGCAAACTGGGGCAAAACCTCCTCTTT                                                                                                                               | TRAV35    | 64 |
| TGTGCTACGGACGCACAGTGTTCCCGAGGAACCTGCAGCCTCTACGCAAACCTGCCAAAGCAGCTCTTAGAAGCCC<br>TAATAGTGGGTAGAAATTAGTGGTTATGTCTTTCAGTCAAGAAGAGTCTACAAACAGCT                                 | TRAV17    | 64 |
| TGTGCTGTGGAGGACACAGAGGACGGGAACCCATGAAGAGCTGAACAGAAACAGAGATCACAGCCTTT                                                                                                        | TRAV2     | 64 |
| TGTGCAGAGAGTACACATTGCTTCTCAGGCACCTGTATCTGTACCCAAACCTGCACCTGGGACTAAAGCCACATTCT<br>ATTTCTTTACTCTT                                                                             | TRAV5     | 63 |
| TGTGCTGTGAGAGACAGTGCTCCCGAGGCACCTGGAGCCCGTACCTAAACTCTAAAGTTGAGGCATCATTTCTACTCC<br>TGTCTTT                                                                                   | TRAV41    | 62 |
| TGTGCTGTGGAGGACACAGAGGACGGGAACCCATGAAGAGCTGAACAGAAACAGAGATCACAGCCTTTGCAGGAG<br>GCAAAACAGAGATGAGCAATAACTTTTT                                                                 | TRAV2     | 62 |
| TGTGCTTTGCAAGTGTCTCCCGAGCACCTGCAGCCTGTACCATAACCT                                                                                                                            | TRAV11    | 61 |
| TGCCTCGTGGGTGACACACAGTGAGACAGATGGGCCTGCACCTGTGCCGTTTTCTCTGTGGGGTGGGAGTACAGC<br>CTAGAAAGAAGTCCAAAGTGTCTTCTAAAATTTTTATTT                                                      | TRAV4     | 59 |

|                                                                               |           |    |
|-------------------------------------------------------------------------------|-----------|----|
| TGTGCCGTGAATGCCACAGTGTCTGGGACTGCAA                                            | TRAV8-1   | 59 |
| TGTATCTCTGTGCCAGAAGCTTAGCCACAGCGTGGCACAGTGC                                   | TRBV7-5   | 58 |
| TTGCACCTCTAGAGACCTTAATAGAGGCCTATCTTTGATCCTCACTTTTCGTTGGGAAATAAGTAGATTT        |           |    |
| TGTGCATCAGGAGGAAGCTACATACCTACATTT                                             | TRAV13-1  | 57 |
| GTGCTGTGGTGAATTCAGGGAGCCCAGAAGCTGGTATTT                                       | TRAV36DV7 | 55 |
| TGTGCTGTGCAGGCACAGCGTTCCAGGCACCTGCAACTTGTATCAAAACCTGCAGCTGAGGATCTGAAATGAT     | TRAV20    | 55 |
| TGTGCTGTGGGTGACAGGAGGACTGTGCCTGGGACTGCAGGAGGAGCTGAACACAACTTCTGAGACTGAGGT      | TRAV8-7   | 55 |
| TTTCAGGAACTCAAGGGCACAGCCTGACCTATTTGTAGCAAGGTCTCTCATTT                         |           |    |
| TGTGGAGCAGACACAGCGATCTTCAGGCCTCTATCAGCTGTCTCAAACCTGCAGCTGGGCCACATATGCTCTTCT   | TRAV34    | 55 |
| GACATGGGGCTCTGAGATGTGGCTGGGACCTTT                                             |           |    |
| TGCGCTCTGAGAGACAGAGTGGGAGGACTGCAGCGAGAGCCAGCACAAACCTGGGGAACGCAGGTGG           | TRAV18    | 54 |
| TGTGCAATGAGCGCACAGTGTCTCCAGACACTTGCAGTCTGTACCCAAACCTGCTGGGCCCCAGGAATGCCTGATGT | TRAV12-3  | 54 |
| AGAGCTTAGACTGCAAGGCAATGAAGTTCT                                                |           |    |
| TGTGCCGCTCTCGGGGCTGTGAGCCAAAAACATTAGTACTTC                                    | TRBV18    | 54 |
| TGCCTCGTGGGTGACACACAGTGTGACAGATGGGCTGCACCTGTGCCGTTTTCTCTGT                    | TRAV4     | 52 |
| TGTGCAGCAAGCGCACAGTGTCTCCAGGCACCTGCAGCCGTA                                    | TRAV29DV5 | 52 |
| CTCAACCTGCTTTGGGGACTCAGACTGGGAGA                                              |           |    |
| CACATAGACTCGCTTCCATTTACACATGCCAATATGAGAGATTATGCTTT                            |           |    |
| TGTGCTGTGAGAGACACGGTACTATGAGGCCTTTAGCTGCACCAAAATTC                            | TRAV1-2   | 52 |
| CAAAAGGCAACCCAGCAGCGAGAA                                                      |           |    |
| GCTGTATTTCTGAGTGTATGCCTGTGTGAGTTAAGACTG                                       | TRBV6-2,  |    |
| GGCCCGGGACCCGGCTCAGTGTGGTAACTGGGGCCGGGGGACCGGGGACGAGACTGCGCTCGGGTT            | TRBV6-3   | 50 |
| TTTGTGGGGGCTCGGGGCGGTGACCAAGAGACCCAGTACTTC                                    |           |    |
| TGGGCTCTGAGAGGGGTATCCACACCTTAGAGGAGGAGAACTAAGGGATTCTGTAATAGAGACACGGGGCAT      | TRAV18    | 50 |
| GGTATGAAAGTATTACCTCCAGTTGCAATTT                                               |           |    |
| TGTGCAATGAGCGCACAGTGTCTCCAGACACTTGCAGTCTGTACCCAAACCTGCTGGGCCCCAGGAATGCCTGATGT | TRAV12-3  | 50 |
| AGAGCTTAGACTGCAAGGCAATGAAGTTCT                                                |           |    |
| TGCCTTGTGGGGGAGATCAGTGTCTCTTATTTAAGTAATAGGTAGTCTGTGAGTTTGTGCAATGGTGTACCTA     | TRAV4     | 49 |
| CGGTATGAATACTGGAGGAACAATTGATAAACTCACATTT                                      |           |    |
| TGTGCTGTGGAGGCACAGTGTCTCCAGTACCTGCAGCCTGTACTCAAATTTACAGCTGAGGCTCTGCAACTGTAA   |           |    |
| GATGGGAACTTGTACATTGAGCAAGCCCTCAAAAATAAACTATACGAAAAGCAGTTATTGGTCAAAATCCTTGTG   | TRAV36DV7 | 49 |
| CCTATGTTGACAATTTACTTTT                                                        |           |    |
| TGGGAAGCAATGTACTTGTCTGCACAGAAGTAGACAGCCAGTCTTCAGTTGGGCTCTGTGATGTGCAGGGAGA     | TRAV13-1  | 48 |
| AATGTTTGCTGTCTTGTCAATGTAACAGCAATTCGTTGGTCTTT                                  |           |    |
| TGTGCTGTGAGAGACACACTGATAGGGGCTGCAGGGGAGCAGAACACAACTCTTGAGTCT                  | TRAV3     | 48 |
| TGTGCTGTGGAGGACACAGAGGCAAGGCAACCCATGAAGAGCTGAACAGAAACAGAGATCACAGCCTTTGCAGGAG  | TRAV2     | 48 |
| GCAAAACAGAGATGAGCAATAACTTTTTCTCTTAATTCAGTATTACCAAGCTTTTTCATTT                 |           |    |
| TGCTCTGGGCTCCAGGCTGTGAGCACAGATACGCAGTATTTT                                    | TRBV22-1  | 47 |
| TGTGCAATGGTGTACCTACGGTATGAATACTGGAGGAACAATTGATAAACTCACATTT                    | TRAV32    | 47 |
|                                                                               | TRBV5-4,  |    |
|                                                                               | TRBV5-5,  |    |
|                                                                               | TRBV5-6,  |    |
|                                                                               | TRBV5-7,  |    |
|                                                                               | TRBV5-8   | 47 |
| TGTGCCACGCTGTGGCTAAGCTGTGGCACAGAGATACACAGTGTAGTCCCTGCTCTGTGCGCTGGATCTTCAGAG   |           |    |
| TGGAGACGGATCTCTCAGGCCTCTCTGCAGAGAACCAGCCACTGGG                                |           |    |
| TGTGCTGTGGAGGACACAGAGGCAAGCCATGAAGAGCTGAACAGAAACAGAGATCACAGCCTTTGCAGGAG       | TRAV2     | 47 |
| GCAAAACAGAGATGAGCAATAACTTTT                                                   |           |    |
| TGTGCCAGCAGTTACTCCACAGCGCTACAAGTTGTCTCTCTCTGCACATAAAGGCAGGGAGGCTCTGCCCTCCACC  | TRBV6-8   | 46 |
| CCGACCTGAGACTCAGGATGACTTGGCAGAGTATTCTGCAACGGGAACCTTGAACCCGAAGTGGCCCAAGT       | TRAV8-4,  |    |
|                                                                               | TRAV8-2   | 45 |
| TGTGCTGTGAGTGACACAGTGTCTGAGACTGCAGGAGAGGTGAACATAAACCTCCTGAGATGCTGAGACTTT      | TRAV8-2   | 43 |
| TGTGTTGTGAGTGACACAGTGTCTGAGACTGCAGGAGAGCTGAACACAAGCCTCCTGAGATGCTGAGACTTT      |           |    |
| TGTGCTCTCAGGAATCCACAGAAGTAGAAATGACAGTGAAGATAAAACAAAACCTTAGCACTCCATAAAGGAAGC   | TRAV33    | 42 |
| CACCTGCTCAGGAGCTTA                                                            |           |    |
| TGTGCTGTGAGTGACACAGTGTGACAGGGACTGCAGGGGAAGCTGAGCACAACTCTGAGCAGCACGAGGGCCTGGC  | TRAV9-1   | 42 |
| TGCTGAGTGAAGCCACTGTGATCCCTCTGGTTAG                                            |           |    |
| TGTGCTGGGAGCAGTGTCTCCCAAAACCTGCAGCCTGTACTCAAACCTTGCAGCTGGAACCTAGTCTCTATGCT    |           |    |
| GCCTTCAGCTCTTAGTCTCTTGGCATGAAATGTGATTATGCATGCCACCTTTGCCACTGCCATTCTGTACCACAACT | TRAV35    | 42 |
| CTCCTTT                                                                       |           |    |
| TGCGCCAGCAGCCAAGACACAGCCTTGCAGAGTACCCTTCTGTGCAGAAACCTTAGGGGCCCTCCAGGAAGCT     | TRBV4-3   | 41 |
| GTGGGGGCCACCAAAGCCTTC                                                         |           |    |
| TGGGAAGCAATGTACTTGTCTGCACAGAAGTAGACAGCCAGTCTTCAGTTGGGCTCTGTGATGTGCAGGGAGA     | TRAV13-1  | 41 |
| AATGTTTGCTGTCTTGTCAATGTAACAGCAATTCGTTGGTCTTTCTTTTCGCCACATTT                   |           |    |

|                                                                                                                                                                                                                                                                                                     |                     |    |
|-----------------------------------------------------------------------------------------------------------------------------------------------------------------------------------------------------------------------------------------------------------------------------------------------------|---------------------|----|
| TGTGCTCTTGGGAACTCACAGTGTGTTGAAGTGATAGTAAAAGCAAACAAAAACCTAGGGCTCAATAAGAGAACC<br>CCTTACTCCCCATCCTT                                                                                                                                                                                                    | TRDV1               | 41 |
| TGTGCTCTGAGTGACACAGTGACAGGGACTGCAGGGGAAGCTGAGCACAACTCTGAGCAGCATGAGGGGCTGGC<br>TGCTGAGTGAAGCCACTGTGATCCCCTCTGGTTAG                                                                                                                                                                                   | TRAV9-1             | 40 |
| AGTGCTTTGCCAACCTGGCCTGTTGATCTGTTTTGTTGTTGAGCAAATCATAGTGTCTTCTGTTCTGCAAGGC<br>AACTGACCTT                                                                                                                                                                                                             | TRAV11              | 39 |
| TCCTTCCTCAGTGGGCTCTGAGAGGGTATCCACACCTTAGAGGAGGAGAACTAAGGGATTCTGTAATAGAGA<br>CACGGGCATGGTATGAAAGTATTACCTCCAGTTGCAATTT                                                                                                                                                                                | TRAV27              | 39 |
| TCTGGCCAGTAAAATTCGGGCCATTCTCTGCCACAGCCCTGGACTGCTAGGAGGGCAGATCATATGTCTTCTCAGTG<br>GGGAGAGGTGGGCCCTCGCTGGCAGTTTCTGTAAGCCCTCGTCTGTGGTGAATTCAGGGAGCCCAAGACTGGT<br>ATTT                                                                                                                                  | TRAV32              | 39 |
| TGTGACAATTAATAATTCTCTGTCTCACGATATCACTCCTCCAGAAGATCTTTAGGGAAAACCTAGTTCAAGTTTC<br>TAGGAGGTTTTGCTCAGCCGAAGATCACTGTGTGAATAATAATGCAGGCAACATGTCACTTT                                                                                                                                                      | TRAV16              | 39 |
| TGTGCAATGAGCGCACAGTGCTCCACAGACTTGCACTGTGATCCCAAACCTGCTGGGCCCCAGGAATGCCTGATGT<br>AGAGCTTAGACTGCAAGGCAATGAAGTTCTATTT                                                                                                                                                                                  | TRAV12-3            | 39 |
| TGTGACAGAAATACACATTGCTTCCAGGCATCTGTAACCATCACCCAAACCTGAGATGGGAGGTGAAGCAGCATCC<br>CTTTCCTTGAATAAATTTAGTTATAGCACTTGTCAATTT                                                                                                                                                                             | TRAV13-2            | 39 |
| TGTGCCAGCAGCCAAGACACAGCCCTGCAAAGTCACTGCATCCCTGTGCACAAACCTCCCGGCTCAGCCAGGAAGCT<br>GCAGGGCAGCGTGTGCACCTGCACCCAGGGCTCCAGTCTCCATTCCCTGATGGCCCTGTATGGAGTTTCAGTCTGTAG<br>TACAGCCAGCTAGTGCACCCAGT                                                                                                          | TRBV3-1,<br>TRBV3-2 | 39 |
| TGTGCCAGCAGCTTAGCCACAGTGTGGCATAAGTCTCCTTCTGTTCAAAACCTCATCTTCTCTCTCTTGCACCT<br>CCTAGAGACCCTAACAGAGCCCTCTTTGCTCCTCACTTTTGTGTTGAAAGTAGATT                                                                                                                                                              | TRBV7-6,<br>TRBV7-7 | 39 |
| TGTGTTGTGAGTGACACAGTGCTTGGAGACTGCAGGAGAGCTGAACACAAGCCTCCTGAGATGCTGAGACTTT                                                                                                                                                                                                                           | TRAV8-2,<br>TRAV8-4 | 39 |
| TGCAGCTGTGCTCTATAATTCACCCCTCCACTT                                                                                                                                                                                                                                                                   | TRBV29-1            | 38 |
| TGTGCTGTGAGTGACACAGTGCTTGGAGACTGCAGGAGAGGTGAACATAAACCTCCTGAGATGCTGAGACTTT                                                                                                                                                                                                                           | TRAV8-4             | 37 |
| TGCATCGTCAGAGTCGCACACTGGGACAGATGGGGCTGCACCTGTGCAATATCTCCCTGGTGCAAGTGAGGAGGA<br>AGGTAGCATTACCTAGAGCAAATGTCGATAGGAGTCAAAAAGTAAACAAGAAAAGA                                                                                                                                                             | TRAV26-1            | 36 |
| AGTGCCACCAGTGATTTCCACAGTGCTTCTGGCCACCTGCTCTACACAGAAAAGACAGACACATGGGTGAGTTGTT<br>TGCTCTGAAGGGTACCTGGATGTGGTTTGTGGGATGTGGGGTGTTAGAGCTTTCAGTGGTTTTAGGTAGTGTGAGC<br>TAAGGGCCACTT                                                                                                                        | TRBV24-1            | 35 |
| TGGCTGTCTCTTCTGCCTGGTTTTGTTGAGCTTCTATCACAGTGGAAACCCGGTAACCAAGTTCTATTTT                                                                                                                                                                                                                              | TRAV1-2             | 35 |
| TGTGCCCTTACACAGTGCTGTTCAAGGCACCTGCAGCCATACGCAAACCTGTGTCTGGTGTGCACTGTTACCAGCATT<br>GACAAAGAACCATGAGTAGGATGGAAAAGACAAGTTCTGTTGAATTACAGTTT                                                                                                                                                             | TRAV24              | 35 |
| TGTGCTAAGGGAGGTGGGGAAGGAGAAGGAATTCTGGGCAGCCCTTCCCACTGTGCTCTACAATGAGCAGTTCTT<br>C                                                                                                                                                                                                                    | TRBV12-2            | 34 |
| TGTGCTCTCAGGAATCCCACAGAAGTAGAAATGACAGTGGAAAGATAAAACAAAACCTTAGCACTCCATAAAGGAAGC<br>CACCTGCTCAGGAGCTTAGGGAAAATACATGAAGCACAGACA                                                                                                                                                                        | TRAV33              | 34 |
| TGTGCTGGGAGCAGAGTGCTCCCAACACCTGCAGCCTGTACTCAAACCTGCAGCTGGAACCTAGTCTCTATGCT<br>GCCTTCAGCTCTTAGTCTCTGGCATGAAATGTGATTATGCATGCCACCTTTGCCACTGCCATTCTGTACCACAAACT<br>CTCCTTATCCAAGGATTTGCTCCTCAAAGATTGTGCTCTT                                                                                             | TRAV35              | 34 |
| TGTGACAGAGTACACATTGCTTCTCAGGCACCTGTATCTGTACCCAAACCTGCACCTGGGACTAAAGCCACACTCT<br>ATTTCTTTACCTT                                                                                                                                                                                                       | TRAV5               | 33 |
| TGTGCAGCAAGCGCACAGTGCTCTCAGGCACCTGCAGCCGTACTCAAACCTGCTTTGGGGACTCAGACTGGGAGA<br>CACATAGACTCGCTTCC                                                                                                                                                                                                    | TRAV29DV5           | 33 |
| TGTGCTTTCATGAAGCACACAATGAGATGAGCAGCAGGGAGAGGCTTACAGAAACCTCAGACCTCAGCATCTGT<br>TGTGCTGTGAGGCACAGTGACAAACAGGCACCTGCAACCAATACCCAACTCTATAGCTGGGGCTCTAACTGCATGTT<br>TTATCTGAGACTGAGCAATGTTTTGCAATTAAGAGGACTTCTAAATGACACTGTCTCCACACAGAAGCAATCAAATA<br>CACAAAACCTGATGTAATAATCTGAAATTAACCTATGAATCTCTGATCTTT | TRAV38-2DV8         | 32 |
| TGTGGAGCAGACACAGCGATCTTCAGGCCTATCAGCTGTCTCAAACCTGCAGCTGGGCCACATATGCTCTTCT<br>GACATGGGGCTCCTGAGATGTGGCTGGGACCTTTGCCAAGACATGAAGTCTCAGAACGTGCAATTGTCTTATT                                                                                                                                              | TRAV21              | 31 |
| TGTGGTGTGGGAGCAATCTGCTGTGGATTTGGGGTGGAGGATTAGAAATGTGTTCAAGGCAGACTGGATGTGTTTTT<br>GACAGGATATGTAACACAGTGTGATTTATAACCCAGGGAGGAAAGCTTATCTTC                                                                                                                                                             | TRAV34              | 31 |
| TGTGCCAGCAGCTTAGCCACAGCATGGCAGTGCCTCCTCTGCTCATAAACCTCATCTTCTCTCTCTTGCAGCT<br>CCTAGACACCTTAACAGAGGCTTCTCTT                                                                                                                                                                                           | TRAV22              | 31 |
| TGTGCTGTGGAGGCACAGTGCTCCCTAGTCACTGCAGCCTGTACTCAAATCTACAGCTGAGGCTCTGCAACTGTAA<br>GATGGGGAACCTGCTACATTGAGCAAAGCCCTCAAAAATAAACTATACGAAAAGCAGTTATTGGTCAAAAATCCTTGTG<br>CCTATGTTGACAATTTTGCAGTTT                                                                                                         | TRBV7-2             | 30 |
| TGTGTTGTTTGTGGTGTGAGATGCCAGGCTGGAGGGAGGAAGCTTAGGGGGTTTTGCTGAGCCAGAAACACT<br>GTGGGGATAACTATGGTCAGAATTTTGTCTT                                                                                                                                                                                         | TRAV36DV7           | 30 |
| TGTAAGCTGCTGACAGCCGTGAGAAGAAAAGCAGCGGAGACAAGCTGACTTTT                                                                                                                                                                                                                                               | TRAV8-2             | 30 |
| GGGCCAGGCACGCGCTCCTGGTCTCGGTGAGCGCGGGCTGCTGGGGCGGGCGGGCGGGCTTGGGTCTGGT<br>TTTTGCGGGGAGTCCCCGGGCTGTGCTCTGGGGCAACGTCTGACTTTT                                                                                                                                                                          | TRAV7               | 29 |
|                                                                                                                                                                                                                                                                                                     | TRBV13              | 28 |

|                                                                                                                                                                                                                                                            |                                                                     |    |
|------------------------------------------------------------------------------------------------------------------------------------------------------------------------------------------------------------------------------------------------------------|---------------------------------------------------------------------|----|
| TGTGCAATGAGCGCACAGTGCTCCCAGACACTTGCACTGTGTACCCAAACCTGCTGGGCCCCAGGAATGCCTGATGT<br>AGAGCTTAGACTGCAAGGCAATGAAGTTCTATTGT                                                                                                                                       | TRAV12-3<br>TRBV5-4,<br>TRBV5-5,<br>TRBV5-6,<br>TRBV5-7,<br>TRBV5-8 | 28 |
| TGTGCCATGCTGTGGCTAAGCTGCTGGCACAGAGATACACGGCCGAGTCTCTGCTGTGTGCGCTGGATCGTCAGA<br>GTGGAGACGGATCCCCAGTCTCTCTGAGAGAAAGCGATCACTGGG                                                                                                                               | TRAV17<br>TRAV28,<br>TRAV8-3                                        | 28 |
| TGTGCTACGGACGCACAGTGTCCCCAGGAACCTGCAGCCTCTACGCAAACCTGCCAAAGCAGCTTCTTAGAAGCCC<br>TAATAGTGGGTAGAATTAGTGGTTATGTCTTTCAGTCAAGAAGAGTCTACAAACAGCTGGCAAAGTAAAAGGGGAAC<br>TCTTCAAATTCGTGATTTTTTAAAAAGCATCTGGACTAGG                                                  | TRBV12-3,<br>TRBV12-4                                               | 26 |
| TGCTGTGGTGAATTCAGGGAGCCAGAAGCTGGTATTT                                                                                                                                                                                                                      | TRAV9-1                                                             | 26 |
| TGTGCCAGCAGTTTAGCCACAGCGCTGCAGAATCACCCCTTCTGTGCAGAAACCTGGTGTCTCCTTCTCCTTCTA<br>CCTCCACAGCAGTCTGGGCAAAGTCTTCTGTTCTCCCTCCCATGAGAAAAAGTGTTTT                                                                                                                  | TRGV10                                                              | 26 |
| TGTGCTCACGATATCACTCCTCCAGAAGATCTTAGGGAAAACCTAGTTCAGTTTCTAGGAGTTTTTCTCAGCCGA<br>AGATCACTGTGTGAATAATAATGCAGGCAACATGCTCACCTTT                                                                                                                                 | TRBV12-3,<br>TRBV12-4                                               | 26 |
| TGTGCTGCGTGGGATTATTATAAGAACTCTTT                                                                                                                                                                                                                           | TRAV9-2                                                             | 25 |
| TGTGCTCACGATATCACTCCTCCAGAAGATCTTAGGGAAAACCTAGTTCAGTTTCTAGGAGTTTTTCTCAGCCGA<br>AGATCACTGTGTGAATAATAATGCAGGCAACATGCTCACCTTT                                                                                                                                 | TRAV8-4                                                             | 24 |
| TATGCTGTGAGTGTCTGATTTTCTCAGCATCTCTGGGGTTTTTGCAAAGCAAGGAACTCTGTGCATACTCTGGGGC<br>TGGGAGTTACCACTCACTTTC                                                                                                                                                      | TRAV17                                                              | 24 |
| TGTGCTACGGACGCACAGTGTCCCCAGGAACCTGCAGCCTCTACGCAAACCTGCCAAAGCAGCTTCTTAGAAGCCC<br>TAATAGTGGGTAGAATTAGTGGTTATGTCTTTCAGTCAAGAAGAGTCTACAAACAGCTGGCAAAGTAAAAGGGGAAC<br>TCTTCAAATTCGTGATTTTTTAAAAAGCATCTGGACTAGGGGAAAAGGCATGAAATTT                                | TRAV38-2DV8                                                         | 24 |
| TGTGCTTATAACACCGACAAGCTCATCTTT                                                                                                                                                                                                                             | TRAV34                                                              | 23 |
| TGTGGAGCAGACACACAGCGATCTTCAGGCCTCTATCAGCTGTCTCCAAACCTGCAGCTGGGCCACATATGCTCTTCT<br>GACATGGGGCTCCTGAGATGTGGCTGGGACTTT                                                                                                                                        | TRAV36DV7                                                           | 22 |
| TGAGCTGTGGGGTCTTAGGCTGAGAACTGAGGCTGGGGAGGCAGGGCACAGATGTTACAGCTCAGGCCCCAGGGC<br>CAGCTCCAGGCTAGTTACCTGTGAGGCACTGTGATAATGTCTCTGGGACACCCGACAGATGTTTTTC                                                                                                         | TRAV5                                                               | 22 |
| TGGCAGAGGAGTTTATGTAAGGGTTGGCCAGAGTGTGTATTGAGGAGGAGTGTGACGGACTCACCTT                                                                                                                                                                                        | TRBV24-1                                                            | 22 |
| TGTGCCACCAAGTATTTGCACAGTGTCTTGGCCACCTGCTCTACACAGAAAGACAGACATGGGTGAGTTGTT<br>TGCTCTGAAGGGTACCTGGATGTGGTTGTGGGATGTGGGGTGTAGAGCTTTCAGTGGTCTTAGGTAGTGTGAGC<br>TAAGGGCCACTTT                                                                                    | TRAV12-3                                                            | 20 |
| TGTGCAATGGTGTACCTACGGTATGAATACTGGAGGAACAATTGATAAACTCACATTT                                                                                                                                                                                                 | TRAV1-2                                                             | 20 |
| TGTGCTGTGAGAGATAGCAACTATCAGTTAATCTGG                                                                                                                                                                                                                       | TRAV34                                                              | 20 |
| TGTGGAGCAGACACACAGCGATCTTCAGGCCTCTATCAGCTGTCTCCAAACCTGCAGCTGGGCCACATATGCTCTTCT<br>GACATGGGGCTCCTGAGATGTGGCTGGGACTTTT                                                                                                                                       | IGLV4-3<br>TRBV18,<br>TRBV21-1                                      | 20 |
| TGTGCTTATAACACCGACAAGCTCATCTTT                                                                                                                                                                                                                             | TRAV20                                                              | 19 |
| TGTGCCGCTCTCGGGGCTGTGAGCCAAAAACATTCACTACTC                                                                                                                                                                                                                 | TRAV23DV6                                                           | 18 |
| TGTGCTGTGAGGACAGCGTTCCCCAGGCACCTGCAACTGTATCAAACCTGCAGCTGAGGATCTGAAATGATG<br>GCAGAGGTATCTCTGCTTCTCCTCTTGAAGGAGTATTTATTTAATGCCAGGACCTTTTTCAAATGGTCTTTGG<br>CAAACAGATGAATTAGACTGACAGGGAGCAAATAGGTAGCAAGTTTTTCGTAATGATGCCTGTGGTAGTGTCTTGA<br>CAGCACAACCTCTCTTT | TRAV1-2                                                             | 18 |
| TGTGCTGTGATGGATAGCAACTATCAGTTAATCTGG                                                                                                                                                                                                                       | TRAV1-2                                                             | 18 |
| TGTGCTGTGATGGATAGCAGCTATAAATTGATCTTC                                                                                                                                                                                                                       | TRAV8-2,<br>TRAV8-4                                                 | 18 |
| TGTGTTGTGAGTGACACAGTGTGAGACTGCAGGAGAGCTGAACACAAGCCTCCTGAGATGCTGAGACTTCTGTG<br>ACTCAAGAACTCGACTTGAAGTCTGTTTTATAATATTAATAGCAATTTCAAGTTT                                                                                                                      | TRBV7-3                                                             | 17 |
| CGTGCCAGCAGCTTAACCACAGCATGACACAATCGCCTCCTCTGCTCATAAACCTCCTCTCTCTCCTTGTCTCCT<br>TATGATACTATTTT                                                                                                                                                              | TRAV5                                                               | 17 |
| TGTGCAAGAGTACACATTGCTTCTCAGGCACCTGTATCCTGTACCCAAACCTGCACCTGGGACTAAAGCCACACTCT<br>ATTTCTTTACCTTTAAGTCAGGGATTTTGTGTAAGGTATTTTTAATGTACGGACATTACAAAACATCTAAAAGGTC<br>AGTTTCAAATGACTTAATGATTTTTCAGAACATTTTATTAACTCTTTTT                                         | TRBV23-1<br>TRBV7-6,<br>TRBV7-7                                     | 17 |
| TGTGCCACCACTCCGTCACAGCACTGAAATGTCAGTTCCTGTTAGCACACAACTTGCACAGACCCAGCTCAGGAA<br>GCAGGTGATGTTAGGTTGGAAGGGAGTAACAGAAAATAACTGGAGCCAGCTTAAGCCACAGTGAATTTAACAC<br>AAGGATAAAGGGTGTAGCAGAAGTCAAGA                                                                  | TRBV7-6                                                             | 17 |
| TGTGCCAGCAGCTTAGCCACAGTGTGGCATAAGTGCCTCCTCTGTTACAAAACCTCATCCTTCTCTCCTTGCACCT<br>CCTAGAGACCTTAACAGAGGCTCTCTTGTCTCCTACTTTTGTGGGAAAGAAGTAGATT                                                                                                                 | TRAV10,<br>TRAV12-1                                                 | 17 |
| TGTGCCAGCAGCTTAGCCACAGTGTGGCATAAGTGCCTCCTCTGTTACAAAACCTCATCCTTCTCTCCTTGCACCT<br>CCTAGAGACCTTAACAGAGGCTCTCTTGTCTCCTACTTTTGTGGGAAAGAAGTAGATT                                                                                                                 |                                                                     |    |
| TGTGCTGTGATGGATAGCAACTATCAGTTAATCTGG                                                                                                                                                                                                                       |                                                                     |    |



|                                                                                                                                                                                          |                                                         |    |
|------------------------------------------------------------------------------------------------------------------------------------------------------------------------------------------|---------------------------------------------------------|----|
| TGTGCAGCACTGTGGAGTCACTGCTGGCACAGAAGTACACAGATGTCTGAGAGGGTACAGCAGACGCCAACGTGAG<br>GGGGAAATCATCTGTGTTTGCTCTGGAGACACTATAACCATCAGGGACTTCTCCTTT                                                | TRBV6-4                                                 | 12 |
| TGTGCCACCTGGGATTATTATAAGAAACTCTTT                                                                                                                                                        | TRGV8                                                   | 12 |
| TGTGCCATGCTGTGGCTAAGCTGCTGGCACAGAGATACACGGCCGAGTCCTCCTGCTGTGTGCGCTGGATCGTCAGA<br>GTGGAGACGGATCCCCAGTCCTCTCTGCAGAGAAGCGATCACTGGGCAGCCCTGATTTGTCTGGTGCACTGTTGCCT<br>TGGAAGTAAATTAATAAACTCC | TRBV5-4,<br>TRBV5-5,<br>TRBV5-6,<br>TRBV5-7,<br>TRBV5-8 | 12 |
| TGTGCCTTTAGCACTATGATGCAGGTGCCAGGAAGTCATAACACAAACTCCTGGGGCACAGCTCAGCAGAGCTGCC<br>TCTTAGGGCAGGTCATGTCTGGGACTTGGCATCCTTCTTAGCCATTTT                                                         | TRAV24                                                  | 12 |

Table 8: VJ rearrangements called by MIXCR for A037 fragments collected by Lymphotrack PCR and CapTCR-Seq (merged data set from all 17 A037 runs)

| V.gene   | J.gene  | Count.A037.PCR | Prop.A037.PCR | Prop.All.A037.Cap |
|----------|---------|----------------|---------------|-------------------|
| TRBV3-1  | TRBJ1-1 | 4382           | 0.029304      | 0.000396          |
| TRBV20-1 | TRBJ2-7 | 2788           | 0.018644      | 0.017509          |
| TRBV14   | TRBJ2-7 | 2422           | 0.016197      | 0.001486          |
| TRBV3-1  | TRBJ2-7 | 2374           | 0.015876      | 0.001739          |
| TRBV9    | TRBJ1-1 | 2134           | 0.014271      | 0.004451          |
| TRBV20-1 | TRBJ1-1 | 1726           | 0.011542      | 0.010284          |
| TRBV14   | TRBJ1-2 | 1724           | 0.011529      | 0.000928          |
| TRBV3-1  | TRBJ1-5 | 1526           | 0.010205      | 0.004118          |
| TRBV2    | TRBJ1-2 | 1421           | 0.009503      | 0.003606          |
| TRBV14   | TRBJ1-1 | 1352           | 0.009041      | 0.000180          |
| TRBV4-3  | TRBJ1-1 | 1324           | 0.008854      | 0.000032          |
| TRBV4-1  | TRBJ2-7 | 1273           | 0.008513      | 0.004001          |
| TRBV3-1  | TRBJ1-2 | 1272           | 0.008506      | 0.000673          |
| TRBV20-1 | TRBJ1-2 | 1269           | 0.008486      | 0.006584          |
| TRBV20-1 | TRBJ2-1 | 1177           | 0.007871      | 0.012874          |
| TRBV18   | TRBJ2-7 | 1143           | 0.007644      | 0.003620          |
| TRBV6-1  | TRBJ2-7 | 1132           | 0.007570      | 0.015143          |
| TRBV7-9  | TRBJ2-7 | 1104           | 0.007383      | 0.003763          |
| TRBV9    | TRBJ2-7 | 1095           | 0.007323      | 0.003137          |
| TRBV28   | TRBJ2-7 | 1080           | 0.007222      | 0.009226          |
| TRBV2    | TRBJ1-5 | 1076           | 0.007195      | 0.001819          |
| TRBV6-5  | TRBJ2-7 | 1055           | 0.007055      | 0.003173          |
| TRBV2    | TRBJ2-7 | 1007           | 0.006734      | 0.003157          |
| TRBV2    | TRBJ1-1 | 999            | 0.006681      | 0.005145          |
| TRBV7-9  | TRBJ1-1 | 981            | 0.006560      | 0.010471          |
| TRBV9    | TRBJ2-1 | 957            | 0.006400      | 0.005073          |
| TRBV14   | TRBJ2-1 | 957            | 0.006400      | 0.001684          |
| TRBV6-4  | TRBJ2-2 | 894            | 0.005978      | 0.002863          |
| TRBV20-1 | TRBJ1-6 | 887            | 0.005932      | 0.008293          |
| TRBV4-1  | TRBJ1-1 | 867            | 0.005798      | 0.000889          |
| TRBV4-3  | TRBJ2-7 | 831            | 0.005557      | 0.000480          |
| TRBV7-2  | TRBJ2-7 | 808            | 0.005403      | 0.003042          |
| TRBV4-3  | TRBJ1-2 | 803            | 0.005370      | 0.000069          |
| TRBV4-2  | TRBJ2-7 | 798            | 0.005336      | 0.000064          |
| TRBV20-1 | TRBJ2-5 | 776            | 0.005189      | 0.005283          |
| TRBV20-1 | TRBJ1-5 | 749            | 0.005009      | 0.006732          |
| TRBV6-4  | TRBJ2-7 | 724            | 0.004842      | 0.001778          |
| TRBV7-9  | TRBJ1-2 | 722            | 0.004828      | 0.002292          |
| TRBV6-5  | TRBJ1-1 | 719            | 0.004808      | 0.000711          |

|          |         |     |          |          |
|----------|---------|-----|----------|----------|
| TRBV3-1  | TRBJ2-1 | 715 | 0.004781 | 0.003440 |
| TRBV9    | TRBJ1-2 | 703 | 0.004701 | 0.001935 |
| TRBV7-8  | TRBJ2-7 | 689 | 0.004608 | 0.001403 |
| TRBV6-4  | TRBJ1-5 | 680 | 0.004547 | 0.000371 |
| TRBV11-2 | TRBJ2-7 | 652 | 0.004360 | 0.000566 |
| TRBV20-1 | TRBJ2-3 | 648 | 0.004333 | 0.021528 |
| TRBV4-1  | TRBJ1-2 | 641 | 0.004287 | 0.001876 |
| TRBV18   | TRBJ1-1 | 636 | 0.004253 | 0.003300 |
| TRBV5-1  | TRBJ2-7 | 631 | 0.004220 | 0.004290 |
| TRBV5-1  | TRBJ1-2 | 613 | 0.004099 | 0.008171 |
| TRBV15   | TRBJ2-7 | 613 | 0.004099 | 0.000977 |
| TRBV6-4  | TRBJ2-1 | 603 | 0.004032 | 0.001786 |
| TRBV29-1 | TRBJ1-1 | 597 | 0.003992 | 0.002848 |
| TRBV9    | TRBJ2-3 | 585 | 0.003912 | 0.006439 |
| TRBV7-2  | TRBJ1-2 | 584 | 0.003905 | 0.005009 |
| TRBV28   | TRBJ1-1 | 573 | 0.003832 | 0.002908 |
| TRBV6-5  | TRBJ1-2 | 556 | 0.003718 | 0.002834 |
| TRBV4-2  | TRBJ1-2 | 538 | 0.003598 | 0.001976 |
| TRBV2    | TRBJ2-1 | 529 | 0.003538 | 0.005215 |
| TRBV29-1 | TRBJ2-7 | 529 | 0.003538 | 0.003695 |
| TRBV6-4  | TRBJ1-1 | 527 | 0.003524 | 0.001009 |
| TRBV7-2  | TRBJ2-1 | 515 | 0.003444 | 0.001440 |
| TRBV11-2 | TRBJ1-1 | 510 | 0.003411 | 0.000411 |
| TRBV6-4  | TRBJ2-3 | 507 | 0.003390 | 0.003505 |
| TRBV7-3  | TRBJ1-1 | 503 | 0.003364 | 0.000774 |
| TRBV6-4  | TRBJ1-2 | 491 | 0.003283 | 0.001884 |
| TRBV28   | TRBJ1-2 | 485 | 0.003243 | 0.001589 |
| TRBV19   | TRBJ2-7 | 481 | 0.003217 | 0.009738 |
| TRBV3-1  | TRBJ2-3 | 481 | 0.003217 | 0.000448 |
| TRBV20-1 | TRBJ1-4 | 471 | 0.003150 | 0.005206 |
| TRBV27   | TRBJ2-7 | 460 | 0.003076 | 0.006600 |
| TRBV7-2  | TRBJ1-1 | 447 | 0.002989 | 0.006537 |
| TRBV2    | TRBJ2-5 | 443 | 0.002962 | 0.001756 |
| TRBV7-2  | TRBJ1-5 | 439 | 0.002936 | 0.000724 |
| TRBV20-1 | TRBJ2-2 | 433 | 0.002896 | 0.002984 |
| TRBV2    | TRBJ1-4 | 415 | 0.002775 | 0.002470 |
| TRBV9    | TRBJ1-5 | 406 | 0.002715 | 0.001708 |
| TRBV15   | TRBJ1-2 | 403 | 0.002695 | 0.001468 |
| TRBV7-3  | TRBJ2-7 | 401 | 0.002682 | 0.003361 |
| TRBV15   | TRBJ1-5 | 400 | 0.002675 | 0.001271 |
| TRBV14   | TRBJ2-2 | 391 | 0.002615 | 0.000761 |
| TRBV5-1  | TRBJ1-1 | 384 | 0.002568 | 0.001606 |
| TRBV3-1  | TRBJ2-5 | 380 | 0.002541 | 0.000684 |

|          |         |     |          |          |
|----------|---------|-----|----------|----------|
| TRBV6-1  | TRBJ1-1 | 379 | 0.002534 | 0.004070 |
| TRBV4-2  | TRBJ1-5 | 376 | 0.002514 | 0.000000 |
| TRBV7-3  | TRBJ2-1 | 372 | 0.002488 | 0.002310 |
| TRBV19   | TRBJ1-1 | 371 | 0.002481 | 0.005632 |
| TRBV13   | TRBJ2-7 | 366 | 0.002448 | 0.002993 |
| TRBV18   | TRBJ1-2 | 359 | 0.002401 | 0.001258 |
| TRBV4-1  | TRBJ1-4 | 359 | 0.002401 | 0.001241 |
| TRBV4-2  | TRBJ2-1 | 358 | 0.002394 | 0.000371 |
| TRBV2    | TRBJ2-2 | 357 | 0.002387 | 0.000633 |
| TRBV4-3  | TRBJ2-1 | 351 | 0.002347 | 0.000000 |
| TRBV6-5  | TRBJ2-1 | 349 | 0.002334 | 0.002428 |
| TRBV9    | TRBJ1-4 | 348 | 0.002327 | 0.001000 |
| TRBV6-5  | TRBJ1-5 | 348 | 0.002327 | 0.000620 |
| TRBV4-1  | TRBJ2-1 | 345 | 0.002307 | 0.002669 |
| TRBV11-2 | TRBJ1-2 | 342 | 0.002287 | 0.000361 |
| TRBV4-1  | TRBJ1-5 | 340 | 0.002274 | 0.001254 |
| TRBV4-2  | TRBJ1-1 | 338 | 0.002260 | 0.000064 |
| TRBV9    | TRBJ2-2 | 326 | 0.002180 | 0.001385 |
| TRBV14   | TRBJ1-4 | 325 | 0.002173 | 0.000000 |
| TRBV4-1  | TRBJ2-2 | 322 | 0.002153 | 0.001901 |
| TRBV4-3  | TRBJ2-3 | 322 | 0.002153 | 0.000036 |
| TRBV7-9  | TRBJ1-5 | 316 | 0.002113 | 0.001446 |
| TRBV29-1 | TRBJ1-5 | 310 | 0.002073 | 0.002242 |
| TRBV6-6  | TRBJ2-7 | 306 | 0.002046 | 0.003808 |
| TRBV6-6  | TRBJ1-1 | 304 | 0.002033 | 0.000365 |
| TRBV12-5 | TRBJ1-1 | 304 | 0.002033 | 0.000000 |
| TRBV6-4  | TRBJ2-5 | 292 | 0.001953 | 0.000411 |
| TRBV5-8  | TRBJ2-1 | 292 | 0.001953 | 0.000404 |
| TRBV7-9  | TRBJ2-1 | 291 | 0.001946 | 0.009035 |
| TRBV5-6  | TRBJ2-7 | 282 | 0.001886 | 0.000113 |
| TRBV9    | TRBJ2-5 | 281 | 0.001879 | 0.002648 |
| TRBV2    | TRBJ2-3 | 281 | 0.001879 | 0.002335 |
| TRBV5-4  | TRBJ2-7 | 280 | 0.001872 | 0.002052 |
| TRBV15   | TRBJ2-1 | 279 | 0.001866 | 0.002272 |
| TRBV5-8  | TRBJ1-4 | 279 | 0.001866 | 0.000032 |
| TRBV4-2  | TRBJ2-2 | 278 | 0.001859 | 0.000064 |
| TRBV11-2 | TRBJ2-1 | 275 | 0.001839 | 0.000115 |
| TRBV28   | TRBJ1-5 | 263 | 0.001759 | 0.002472 |
| TRBV30   | TRBJ2-7 | 262 | 0.001752 | 0.002316 |
| TRBV7-8  | TRBJ1-1 | 262 | 0.001752 | 0.000738 |
| TRBV27   | TRBJ1-5 | 254 | 0.001699 | 0.001662 |
| TRBV4-1  | TRBJ2-3 | 254 | 0.001699 | 0.001270 |
| TRBV27   | TRBJ1-2 | 253 | 0.001692 | 0.002777 |

|          |         |     |          |          |
|----------|---------|-----|----------|----------|
| TRBV14   | TRBJ2-3 | 249 | 0.001665 | 0.001372 |
| TRBV27   | TRBJ1-1 | 245 | 0.001638 | 0.003937 |
| TRBV29-1 | TRBJ1-2 | 243 | 0.001625 | 0.002870 |
| TRBV29-1 | TRBJ2-1 | 243 | 0.001625 | 0.001536 |
| TRBV7-2  | TRBJ2-5 | 240 | 0.001605 | 0.003002 |
| TRBV4-3  | TRBJ1-6 | 240 | 0.001605 | 0.000000 |
| TRBV5-8  | TRBJ1-2 | 237 | 0.001585 | 0.000000 |
| TRBV4-2  | TRBJ2-3 | 233 | 0.001558 | 0.000245 |
| TRBV7-9  | TRBJ2-3 | 231 | 0.001545 | 0.004514 |
| TRBV4-3  | TRBJ1-5 | 231 | 0.001545 | 0.000000 |
| TRBV19   | TRBJ2-2 | 229 | 0.001531 | 0.002130 |
| TRBV4-2  | TRBJ1-4 | 227 | 0.001518 | 0.000000 |
| TRBV28   | TRBJ2-1 | 225 | 0.001505 | 0.004557 |
| TRBV11-3 | TRBJ2-1 | 222 | 0.001485 | 0.005390 |
| TRBV6-6  | TRBJ2-1 | 222 | 0.001485 | 0.002532 |
| TRBV15   | TRBJ2-3 | 222 | 0.001485 | 0.002198 |
| TRBV18   | TRBJ1-5 | 220 | 0.001471 | 0.001213 |
| TRBV25-1 | TRBJ1-1 | 219 | 0.001465 | 0.001140 |
| TRBV5-1  | TRBJ2-5 | 218 | 0.001458 | 0.002663 |
| TRBV7-3  | TRBJ1-2 | 218 | 0.001458 | 0.000227 |
| TRBV12-5 | TRBJ1-2 | 217 | 0.001451 | 0.000136 |
| TRBV7-2  | TRBJ2-3 | 210 | 0.001404 | 0.007456 |
| TRBV3-1  | TRBJ1-4 | 210 | 0.001404 | 0.000296 |
| TRBV2    | TRBJ1-6 | 209 | 0.001398 | 0.000993 |
| TRBV4-1  | TRBJ2-5 | 209 | 0.001398 | 0.000794 |
| TRBV14   | TRBJ2-5 | 209 | 0.001398 | 0.000353 |
| TRBV6-5  | TRBJ2-5 | 208 | 0.001391 | 0.001399 |
| TRBV7-9  | TRBJ2-2 | 208 | 0.001391 | 0.000551 |
| TRBV6-5  | TRBJ2-3 | 205 | 0.001371 | 0.000772 |
| TRBV19   | TRBJ1-2 | 204 | 0.001364 | 0.002810 |
| TRBV12-5 | TRBJ2-7 | 203 | 0.001358 | 0.001462 |
| TRBV10-3 | TRBJ2-7 | 202 | 0.001351 | 0.001097 |
| TRBV6-1  | TRBJ1-2 | 201 | 0.001344 | 0.001786 |
| TRBV7-3  | TRBJ2-3 | 200 | 0.001337 | 0.002411 |
| TRBV19   | TRBJ2-1 | 198 | 0.001324 | 0.003878 |
| TRBV4-2  | TRBJ2-5 | 197 | 0.001317 | 0.000257 |
| TRBV29-1 | TRBJ2-3 | 195 | 0.001304 | 0.000352 |
| TRBV7-3  | TRBJ2-2 | 194 | 0.001297 | 0.001992 |
| TRBV7-9  | TRBJ1-4 | 189 | 0.001264 | 0.000256 |
| TRBV5-4  | TRBJ1-2 | 187 | 0.001251 | 0.001454 |
| TRBV6-5  | TRBJ2-2 | 187 | 0.001251 | 0.000261 |
| TRBV15   | TRBJ1-4 | 183 | 0.001224 | 0.000217 |
| TRBV13   | TRBJ1-1 | 182 | 0.001217 | 0.000144 |

|          |         |     |          |          |
|----------|---------|-----|----------|----------|
| TRBV3-1  | TRBJ1-3 | 181 | 0.001210 | 0.000000 |
| TRBV4-3  | TRBJ1-3 | 180 | 0.001204 | 0.001277 |
| TRBV7-8  | TRBJ1-5 | 178 | 0.001190 | 0.000765 |
| TRBV5-3  | TRBJ1-4 | 177 | 0.001184 | 0.004953 |
| TRBV25-1 | TRBJ1-2 | 175 | 0.001170 | 0.000450 |
| TRBV19   | TRBJ1-5 | 172 | 0.001150 | 0.004812 |
| TRBV29-1 | TRBJ2-5 | 170 | 0.001137 | 0.000930 |
| TRBV24-1 | TRBJ1-1 | 169 | 0.001130 | 0.001243 |
| TRBV6-4  | TRBJ1-4 | 169 | 0.001130 | 0.001207 |
| TRBV6-4  | TRBJ2-6 | 169 | 0.001130 | 0.000850 |
| TRBV10-1 | TRBJ2-7 | 168 | 0.001123 | 0.000879 |
| TRBV7-9  | TRBJ2-5 | 164 | 0.001097 | 0.001274 |
| TRBV11-3 | TRBJ1-1 | 164 | 0.001097 | 0.000032 |
| TRBV23-1 | TRBJ2-7 | 159 | 0.001063 | 0.000740 |
| TRBV7-2  | TRBJ2-2 | 158 | 0.001057 | 0.002693 |
| TRBV2    | TRBJ1-3 | 157 | 0.001050 | 0.000397 |
| TRBV15   | TRBJ1-1 | 157 | 0.001050 | 0.000100 |
| TRBV7-8  | TRBJ1-3 | 156 | 0.001043 | 0.001272 |
| TRBV6-6  | TRBJ1-5 | 156 | 0.001043 | 0.001002 |
| TRBV5-1  | TRBJ2-3 | 154 | 0.001030 | 0.002081 |
| TRBV5-8  | TRBJ1-5 | 154 | 0.001030 | 0.000000 |
| TRBV11-3 | TRBJ2-2 | 153 | 0.001023 | 0.001025 |
| TRBV5-6  | TRBJ1-1 | 153 | 0.001023 | 0.000610 |
| TRBV15   | TRBJ1-6 | 153 | 0.001023 | 0.000291 |
| TRBV7-4  | TRBJ2-7 | 153 | 0.001023 | 0.000016 |
| TRBV25-1 | TRBJ2-7 | 152 | 0.001016 | 0.000373 |
| TRBV4-2  | TRBJ1-3 | 150 | 0.001003 | 0.000000 |
| TRBV6-5  | TRBJ1-3 | 149 | 0.000996 | 0.000854 |
| TRBV5-4  | TRBJ1-1 | 149 | 0.000996 | 0.000395 |
| TRBV5-4  | TRBJ2-1 | 146 | 0.000976 | 0.001342 |
| TRBV6-1  | TRBJ2-1 | 145 | 0.000970 | 0.008441 |
| TRBV5-6  | TRBJ2-1 | 143 | 0.000956 | 0.000575 |
| TRBV10-3 | TRBJ1-5 | 142 | 0.000950 | 0.001031 |
| TRBV11-2 | TRBJ2-3 | 141 | 0.000943 | 0.000032 |
| TRBV6-1  | TRBJ1-5 | 140 | 0.000936 | 0.001347 |
| TRBV18   | TRBJ2-1 | 139 | 0.000930 | 0.003559 |
| TRBV11-3 | TRBJ2-7 | 136 | 0.000909 | 0.000865 |
| TRBV18   | TRBJ2-5 | 135 | 0.000903 | 0.001338 |
| TRBV6-6  | TRBJ1-2 | 134 | 0.000896 | 0.000048 |
| TRBV19   | TRBJ1-4 | 130 | 0.000869 | 0.001868 |
| TRBV18   | TRBJ1-4 | 130 | 0.000869 | 0.001151 |
| TRBV18   | TRBJ2-2 | 130 | 0.000869 | 0.000977 |
| TRBV7-3  | TRBJ1-5 | 128 | 0.000856 | 0.000122 |

|          |         |     |          |          |
|----------|---------|-----|----------|----------|
| TRBV11-2 | TRBJ1-4 | 128 | 0.000856 | 0.000000 |
| TRBV7-8  | TRBJ1-2 | 127 | 0.000849 | 0.000154 |
| TRBV25-1 | TRBJ1-5 | 126 | 0.000843 | 0.000935 |
| TRBV10-3 | TRBJ1-1 | 125 | 0.000836 | 0.001663 |
| TRBV7-8  | TRBJ2-1 | 125 | 0.000836 | 0.001618 |
| TRBV25-1 | TRBJ2-1 | 123 | 0.000823 | 0.001317 |
| TRBV12-5 | TRBJ1-5 | 123 | 0.000823 | 0.000016 |
| TRBV6-5  | TRBJ1-6 | 122 | 0.000816 | 0.000272 |
| TRBV28   | TRBJ2-5 | 121 | 0.000809 | 0.000790 |
| TRBV9    | TRBJ2-6 | 121 | 0.000809 | 0.000618 |
| TRBV15   | TRBJ2-5 | 120 | 0.000802 | 0.000249 |
| TRBV5-6  | TRBJ1-2 | 119 | 0.000796 | 0.002389 |
| TRBV7-3  | TRBJ2-5 | 119 | 0.000796 | 0.002288 |
| TRBV30   | TRBJ1-5 | 118 | 0.000789 | 0.001115 |
| TRBV20-1 | TRBJ1-3 | 117 | 0.000782 | 0.001713 |
| TRBV5-1  | TRBJ1-4 | 117 | 0.000782 | 0.000993 |
| TRBV18   | TRBJ1-3 | 116 | 0.000776 | 0.000642 |
| TRBV10-3 | TRBJ1-2 | 116 | 0.000776 | 0.000456 |
| TRBV27   | TRBJ2-2 | 114 | 0.000762 | 0.001956 |
| TRBV28   | TRBJ2-3 | 114 | 0.000762 | 0.000935 |
| TRBV5-8  | TRBJ1-1 | 114 | 0.000762 | 0.000100 |
| TRBV12-5 | TRBJ2-5 | 112 | 0.000749 | 0.000000 |
| TRBV6-1  | TRBJ1-4 | 111 | 0.000742 | 0.000801 |
| TRBV13   | TRBJ1-2 | 111 | 0.000742 | 0.000601 |
| TRBV14   | TRBJ2-6 | 111 | 0.000742 | 0.000036 |
| TRBV4-3  | TRBJ2-2 | 111 | 0.000742 | 0.000000 |
| TRBV11-2 | TRBJ2-5 | 110 | 0.000736 | 0.000240 |
| TRBV18   | TRBJ2-3 | 109 | 0.000729 | 0.002254 |
| TRBV28   | TRBJ2-2 | 109 | 0.000729 | 0.001550 |
| TRBV6-1  | TRBJ2-3 | 109 | 0.000729 | 0.001548 |
| TRBV29-1 | TRBJ2-2 | 109 | 0.000729 | 0.000612 |
| TRBV9    | TRBJ1-6 | 109 | 0.000729 | 0.000599 |
| TRBV5-4  | TRBJ2-3 | 107 | 0.000716 | 0.000592 |
| TRBV5-1  | TRBJ2-1 | 104 | 0.000695 | 0.005116 |
| TRBV7-2  | TRBJ1-6 | 104 | 0.000695 | 0.000692 |
| TRBV27   | TRBJ2-1 | 103 | 0.000689 | 0.002539 |
| TRBV29-1 | TRBJ1-4 | 103 | 0.000689 | 0.000199 |
| TRBV6-4  | TRBJ1-6 | 102 | 0.000682 | 0.001585 |
| TRBV3-1  | TRBJ2-4 | 102 | 0.000682 | 0.000000 |
| TRBV7-3  | TRBJ1-6 | 101 | 0.000675 | 0.002202 |
| TRBV28   | TRBJ1-3 | 100 | 0.000669 | 0.000617 |
| TRBV4-1  | TRBJ1-6 | 100 | 0.000669 | 0.000048 |
| TRBV11-2 | TRBJ1-5 | 97  | 0.000649 | 0.000891 |

|          |         |    |          |          |
|----------|---------|----|----------|----------|
| TRBV25-1 | TRBJ1-6 | 97 | 0.000649 | 0.000330 |
| TRBV12-5 | TRBJ2-2 | 97 | 0.000649 | 0.000036 |
| TRBV11-3 | TRBJ2-3 | 97 | 0.000649 | 0.000000 |
| TRBV7-8  | TRBJ2-2 | 96 | 0.000642 | 0.000160 |
| TRBV5-1  | TRBJ1-5 | 95 | 0.000635 | 0.000942 |
| TRBV9    | TRBJ1-3 | 95 | 0.000635 | 0.000834 |
| TRBV18   | TRBJ1-6 | 95 | 0.000635 | 0.000548 |
| TRBV13   | TRBJ1-5 | 94 | 0.000629 | 0.000000 |
| TRBV20-1 | TRBJ2-4 | 93 | 0.000622 | 0.000910 |
| TRBV12-5 | TRBJ1-4 | 92 | 0.000615 | 0.000036 |
| TRBV6-1  | TRBJ2-5 | 91 | 0.000609 | 0.000766 |
| TRBV10-1 | TRBJ2-1 | 90 | 0.000602 | 0.000680 |
| TRBV5-4  | TRBJ1-4 | 90 | 0.000602 | 0.000212 |
| TRBV4-1  | TRBJ1-3 | 90 | 0.000602 | 0.000000 |
| TRBV12-5 | TRBJ2-1 | 89 | 0.000595 | 0.000096 |
| TRBV6-5  | TRBJ2-6 | 88 | 0.000588 | 0.000147 |
| TRBV25-1 | TRBJ2-2 | 87 | 0.000582 | 0.000104 |
| TRBV24-1 | TRBJ1-2 | 86 | 0.000575 | 0.002252 |
| TRBV5-8  | TRBJ2-5 | 86 | 0.000575 | 0.000048 |
| TRBV27   | TRBJ2-3 | 85 | 0.000568 | 0.002872 |
| TRBV14   | TRBJ1-3 | 85 | 0.000568 | 0.000731 |
| TRBV19   | TRBJ2-5 | 84 | 0.000562 | 0.003521 |
| TRBV20-1 | TRBJ2-6 | 84 | 0.000562 | 0.000374 |
| TRBV10-1 | TRBJ1-2 | 83 | 0.000555 | 0.000379 |
| TRBV5-6  | TRBJ2-5 | 82 | 0.000548 | 0.000032 |
| TRBV30   | TRBJ1-2 | 81 | 0.000542 | 0.001014 |
| TRBV10-3 | TRBJ2-5 | 80 | 0.000535 | 0.001102 |
| TRBV30   | TRBJ1-1 | 78 | 0.000522 | 0.000610 |
| TRBV10-1 | TRBJ1-1 | 78 | 0.000522 | 0.000479 |
| TRBV24-1 | TRBJ2-7 | 76 | 0.000508 | 0.000808 |
| TRBV11-1 | TRBJ2-1 | 75 | 0.000502 | 0.000072 |
| TRBV24-1 | TRBJ1-5 | 74 | 0.000495 | 0.000447 |
| TRBV10-3 | TRBJ2-1 | 73 | 0.000488 | 0.001149 |
| TRBV7-8  | TRBJ1-6 | 72 | 0.000481 | 0.000531 |
| TRBV10-2 | TRBJ1-1 | 72 | 0.000481 | 0.000372 |
| TRBV7-4  | TRBJ1-2 | 72 | 0.000481 | 0.000080 |
| TRBV13   | TRBJ1-4 | 71 | 0.000475 | 0.000099 |
| TRBV11-3 | TRBJ2-5 | 71 | 0.000475 | 0.000000 |
| TRBV7-9  | TRBJ1-3 | 70 | 0.000468 | 0.003052 |
| TRBV6-6  | TRBJ2-3 | 70 | 0.000468 | 0.000281 |
| TRBV7-3  | TRBJ2-6 | 70 | 0.000468 | 0.000048 |
| TRBV7-9  | TRBJ1-6 | 68 | 0.000455 | 0.001893 |
| TRBV24-1 | TRBJ2-1 | 67 | 0.000448 | 0.001312 |

|          |         |    |          |          |
|----------|---------|----|----------|----------|
| TRBV15   | TRBJ2-4 | 67 | 0.000448 | 0.000681 |
| TRBV23-1 | TRBJ1-6 | 67 | 0.000448 | 0.000626 |
| TRBV23-1 | TRBJ1-5 | 66 | 0.000441 | 0.000397 |
| TRBV30   | TRBJ2-1 | 66 | 0.000441 | 0.000280 |
| TRBV6-8  | TRBJ2-7 | 65 | 0.000435 | 0.000872 |
| TRBV5-8  | TRBJ2-2 | 65 | 0.000435 | 0.000000 |
| TRBV11-2 | TRBJ1-6 | 64 | 0.000428 | 0.000072 |
| TRBV24-1 | TRBJ2-2 | 63 | 0.000421 | 0.001334 |
| TRBV6-6  | TRBJ2-2 | 63 | 0.000421 | 0.000000 |
| TRBV13   | TRBJ2-5 | 62 | 0.000415 | 0.000885 |
| TRBV5-8  | TRBJ2-7 | 62 | 0.000415 | 0.000222 |
| TRBV7-4  | TRBJ2-3 | 62 | 0.000415 | 0.000099 |
| TRBV5-6  | TRBJ1-5 | 62 | 0.000415 | 0.000072 |
| TRBV11-2 | TRBJ2-2 | 62 | 0.000415 | 0.000032 |
| TRBV2    | TRBJ2-6 | 61 | 0.000408 | 0.000927 |
| TRBV7-2  | TRBJ1-4 | 60 | 0.000401 | 0.000523 |
| TRBV25-1 | TRBJ2-3 | 59 | 0.000395 | 0.001009 |
| TRBV5-8  | TRBJ2-3 | 59 | 0.000395 | 0.000223 |
| TRBV5-1  | TRBJ1-3 | 59 | 0.000395 | 0.000165 |
| TRBV11-1 | TRBJ2-7 | 59 | 0.000395 | 0.000138 |
| TRBV6-4  | TRBJ1-3 | 59 | 0.000395 | 0.000029 |
| TRBV19   | TRBJ2-3 | 58 | 0.000388 | 0.002347 |
| TRBV23-1 | TRBJ1-2 | 57 | 0.000381 | 0.000196 |
| TRBV11-1 | TRBJ1-1 | 57 | 0.000381 | 0.000048 |
| TRBV5-4  | TRBJ1-6 | 57 | 0.000381 | 0.000032 |
| TRBV10-1 | TRBJ2-5 | 56 | 0.000374 | 0.001244 |
| TRBV6-5  | TRBJ1-4 | 56 | 0.000374 | 0.000903 |
| TRBV15   | TRBJ2-2 | 56 | 0.000374 | 0.000129 |
| TRBV28   | TRBJ2-6 | 55 | 0.000368 | 0.000400 |
| TRBV5-4  | TRBJ1-5 | 55 | 0.000368 | 0.000016 |
| TRBV27   | TRBJ2-5 | 54 | 0.000361 | 0.000440 |
| TRBV7-8  | TRBJ2-5 | 53 | 0.000354 | 0.000609 |
| TRBV4-1  | TRBJ2-6 | 53 | 0.000354 | 0.000128 |
| TRBV10-2 | TRBJ2-2 | 52 | 0.000348 | 0.001740 |
| TRBV19   | TRBJ1-3 | 52 | 0.000348 | 0.001198 |
| TRBV10-3 | TRBJ2-2 | 52 | 0.000348 | 0.001039 |
| TRBV4-3  | TRBJ2-6 | 52 | 0.000348 | 0.000375 |
| TRBV6-7  | TRBJ2-7 | 52 | 0.000348 | 0.000144 |
| TRBV4-3  | TRBJ1-4 | 52 | 0.000348 | 0.000000 |
| TRBV27   | TRBJ1-4 | 51 | 0.000341 | 0.000673 |
| TRBV5-4  | TRBJ2-5 | 51 | 0.000341 | 0.000084 |
| TRBV28   | TRBJ1-4 | 50 | 0.000334 | 0.001543 |
| TRBV6-1  | TRBJ2-2 | 50 | 0.000334 | 0.000616 |

|          |         |    |          |          |
|----------|---------|----|----------|----------|
| TRBV7-8  | TRBJ2-3 | 49 | 0.000328 | 0.001702 |
| TRBV13   | TRBJ2-1 | 49 | 0.000328 | 0.001134 |
| TRBV5-3  | TRBJ2-7 | 49 | 0.000328 | 0.000913 |
| TRBV13   | TRBJ2-3 | 49 | 0.000328 | 0.000756 |
| TRBV5-1  | TRBJ2-2 | 49 | 0.000328 | 0.000651 |
| TRBV30   | TRBJ2-5 | 49 | 0.000328 | 0.000112 |
| TRBV18   | TRBJ2-6 | 48 | 0.000321 | 0.000443 |
| TRBV7-8  | TRBJ1-4 | 48 | 0.000321 | 0.000365 |
| TRBV12-5 | TRBJ2-3 | 47 | 0.000314 | 0.000956 |
| TRBV30   | TRBJ1-3 | 47 | 0.000314 | 0.000540 |
| TRBV16   | TRBJ1-2 | 47 | 0.000314 | 0.000032 |
| TRBV6-1  | TRBJ2-6 | 44 | 0.000294 | 0.000000 |
| TRBV6-8  | TRBJ2-5 | 44 | 0.000294 | 0.000000 |
| TRBV24-1 | TRBJ2-5 | 43 | 0.000288 | 0.001429 |
| TRBV25-1 | TRBJ2-5 | 43 | 0.000288 | 0.000879 |
| TRBV4-2  | TRBJ1-6 | 43 | 0.000288 | 0.000064 |
| TRBV6-4  | TRBJ2-4 | 43 | 0.000288 | 0.000000 |
| TRBV5-6  | TRBJ2-3 | 42 | 0.000281 | 0.000256 |
| TRBV23-1 | TRBJ1-1 | 42 | 0.000281 | 0.000131 |
| TRBV7-3  | TRBJ1-3 | 42 | 0.000281 | 0.000106 |
| TRBV5-6  | TRBJ2-2 | 42 | 0.000281 | 0.000064 |
| TRBV10-2 | TRBJ2-7 | 41 | 0.000274 | 0.004487 |
| TRBV14   | TRBJ2-4 | 41 | 0.000274 | 0.000000 |
| TRBV19   | TRBJ1-6 | 40 | 0.000267 | 0.000568 |
| TRBV3-1  | TRBJ1-6 | 40 | 0.000267 | 0.000104 |
| TRBV10-3 | TRBJ2-3 | 39 | 0.000261 | 0.000712 |
| TRBV4-3  | TRBJ2-5 | 39 | 0.000261 | 0.000099 |
| TRBV11-1 | TRBJ1-2 | 38 | 0.000254 | 0.000032 |
| TRBV16   | TRBJ1-1 | 38 | 0.000254 | 0.000000 |
| TRBV6-6  | TRBJ1-6 | 38 | 0.000254 | 0.000000 |
| TRBV6-7  | TRBJ2-2 | 37 | 0.000247 | 0.001408 |
| TRBV6-6  | TRBJ1-3 | 37 | 0.000247 | 0.000077 |
| TRBV19   | TRBJ2-6 | 36 | 0.000241 | 0.000742 |
| TRBV27   | TRBJ1-6 | 35 | 0.000234 | 0.000894 |
| TRBV6-1  | TRBJ1-3 | 34 | 0.000227 | 0.000298 |
| TRBV5-3  | TRBJ1-2 | 34 | 0.000227 | 0.000298 |
| TRBV7-6  | TRBJ2-3 | 34 | 0.000227 | 0.000000 |
| TRBV24-1 | TRBJ2-3 | 33 | 0.000221 | 0.001781 |
| TRBV5-1  | TRBJ2-6 | 33 | 0.000221 | 0.000233 |
| TRBV7-2  | TRBJ2-6 | 33 | 0.000221 | 0.000000 |
| TRBV30   | TRBJ2-2 | 32 | 0.000214 | 0.000417 |
| TRBV23-1 | TRBJ2-5 | 32 | 0.000214 | 0.000096 |
| TRBV6-6  | TRBJ2-5 | 31 | 0.000207 | 0.000000 |

|          |         |    |          |          |
|----------|---------|----|----------|----------|
| TRBV30   | TRBJ2-3 | 30 | 0.000201 | 0.000905 |
| TRBV29-1 | TRBJ2-6 | 30 | 0.000201 | 0.000335 |
| TRBV12-5 | TRBJ1-6 | 30 | 0.000201 | 0.000000 |
| TRBV30   | TRBJ1-4 | 29 | 0.000194 | 0.005564 |
| TRBV29-1 | TRBJ1-3 | 29 | 0.000194 | 0.001851 |
| TRBV5-4  | TRBJ1-3 | 29 | 0.000194 | 0.000639 |
| TRBV10-1 | TRBJ2-2 | 29 | 0.000194 | 0.000437 |
| TRBV11-1 | TRBJ2-5 | 29 | 0.000194 | 0.000000 |
| TRBV6-6  | TRBJ2-6 | 29 | 0.000194 | 0.000000 |
| TRBV25-1 | TRBJ1-4 | 28 | 0.000187 | 0.000188 |
| TRBV10-3 | TRBJ1-3 | 28 | 0.000187 | 0.000109 |
| TRBV11-1 | TRBJ2-2 | 28 | 0.000187 | 0.000064 |
| TRBV6-9  | TRBJ2-7 | 28 | 0.000187 | 0.000000 |
| TRBV29-1 | TRBJ2-4 | 27 | 0.000181 | 0.001031 |
| TRBV25-1 | TRBJ1-3 | 27 | 0.000181 | 0.000163 |
| TRBV23-1 | TRBJ2-1 | 27 | 0.000181 | 0.000124 |
| TRBV24-1 | TRBJ1-4 | 26 | 0.000174 | 0.000493 |
| TRBV11-2 | TRBJ1-3 | 26 | 0.000174 | 0.000283 |
| TRBV13   | TRBJ2-6 | 26 | 0.000174 | 0.000032 |
| TRBV10-3 | TRBJ1-6 | 25 | 0.000167 | 0.000156 |
| TRBV10-2 | TRBJ2-1 | 25 | 0.000167 | 0.000000 |
| TRBV11-3 | TRBJ1-5 | 25 | 0.000167 | 0.000000 |
| TRBV11-3 | TRBJ2-4 | 25 | 0.000167 | 0.000000 |
| TRBV15   | TRBJ2-6 | 25 | 0.000167 | 0.000000 |
| TRBV6-9  | TRBJ1-1 | 24 | 0.000160 | 0.000000 |
| TRBV5-1  | TRBJ1-6 | 23 | 0.000154 | 0.001063 |
| TRBV25-1 | TRBJ2-6 | 23 | 0.000154 | 0.000976 |
| TRBV6-6  | TRBJ1-4 | 23 | 0.000154 | 0.000208 |
| TRBV11-3 | TRBJ1-3 | 23 | 0.000154 | 0.000000 |
| TRBV23-1 | TRBJ1-3 | 23 | 0.000154 | 0.000000 |
| TRBV13   | TRBJ1-6 | 22 | 0.000147 | 0.000465 |
| TRBV10-1 | TRBJ1-3 | 22 | 0.000147 | 0.000216 |
| TRBV7-4  | TRBJ2-1 | 22 | 0.000147 | 0.000000 |
| TRBV28   | TRBJ1-6 | 21 | 0.000140 | 0.000793 |
| TRBV10-1 | TRBJ1-5 | 21 | 0.000140 | 0.000258 |
| TRBV7-6  | TRBJ2-7 | 21 | 0.000140 | 0.000193 |
| TRBV7-4  | TRBJ2-2 | 21 | 0.000140 | 0.000000 |
| TRBV27   | TRBJ2-4 | 20 | 0.000134 | 0.000080 |
| TRBV10-2 | TRBJ2-3 | 20 | 0.000134 | 0.000000 |
| TRBV11-3 | TRBJ2-6 | 20 | 0.000134 | 0.000000 |
| TRBV5-6  | TRBJ1-3 | 20 | 0.000134 | 0.000000 |
| TRBV6-7  | TRBJ1-1 | 20 | 0.000134 | 0.000000 |
| TRBV6-1  | TRBJ1-6 | 19 | 0.000127 | 0.000057 |

|          |         |    |          |          |
|----------|---------|----|----------|----------|
| TRBV5-4  | TRBJ2-2 | 18 | 0.000120 | 0.000404 |
| TRBV24-1 | TRBJ2-6 | 18 | 0.000120 | 0.000364 |
| TRBV7-9  | TRBJ2-6 | 18 | 0.000120 | 0.000179 |
| TRBV6-9  | TRBJ2-5 | 18 | 0.000120 | 0.000108 |
| TRBV7-6  | TRBJ2-1 | 18 | 0.000120 | 0.000029 |
| TRBV6-5  | TRBJ2-4 | 18 | 0.000120 | 0.000000 |
| TRBV27   | TRBJ2-6 | 17 | 0.000114 | 0.001568 |
| TRBV7-9  | TRBJ2-4 | 17 | 0.000114 | 0.001231 |
| TRBV2    | TRBJ2-4 | 17 | 0.000114 | 0.000698 |
| TRBV24-1 | TRBJ1-6 | 16 | 0.000107 | 0.003797 |
| TRBV12-5 | TRBJ2-4 | 16 | 0.000107 | 0.000315 |
| TRBV4-1  | TRBJ2-4 | 16 | 0.000107 | 0.000000 |
| TRBV13   | TRBJ2-2 | 15 | 0.000100 | 0.000284 |
| TRBV10-2 | TRBJ1-2 | 15 | 0.000100 | 0.000080 |
| TRBV23-1 | TRBJ1-4 | 15 | 0.000100 | 0.000045 |
| TRBV6-8  | TRBJ1-4 | 15 | 0.000100 | 0.000032 |
| TRBV11-1 | TRBJ2-3 | 15 | 0.000100 | 0.000000 |
| TRBV6-9  | TRBJ1-3 | 15 | 0.000100 | 0.000000 |
| TRBV7-6  | TRBJ1-2 | 15 | 0.000100 | 0.000000 |
| TRBV5-1  | TRBJ2-4 | 14 | 0.000094 | 0.001355 |
| TRBV13   | TRBJ1-3 | 14 | 0.000094 | 0.000132 |
| TRBV7-6  | TRBJ2-2 | 14 | 0.000094 | 0.000096 |
| TRBV5-4  | TRBJ2-6 | 14 | 0.000094 | 0.000016 |
| TRBV11-1 | TRBJ1-6 | 14 | 0.000094 | 0.000000 |
| TRBV5-8  | TRBJ2-6 | 14 | 0.000094 | 0.000000 |
| TRBV9    | TRBJ2-4 | 13 | 0.000087 | 0.000408 |
| TRBV10-1 | TRBJ2-3 | 13 | 0.000087 | 0.000177 |
| TRBV27   | TRBJ1-3 | 13 | 0.000087 | 0.000000 |
| TRBV6-9  | TRBJ2-2 | 13 | 0.000087 | 0.000000 |
| TRBV7-2  | TRBJ1-3 | 12 | 0.000080 | 0.001181 |
| TRBV11-2 | TRBJ2-6 | 12 | 0.000080 | 0.000288 |
| TRBV7-2  | TRBJ2-4 | 12 | 0.000080 | 0.000252 |
| TRBV24-1 | TRBJ1-3 | 12 | 0.000080 | 0.000032 |
| TRBV5-4  | TRBJ2-4 | 12 | 0.000080 | 0.000032 |
| TRBV7-6  | TRBJ1-3 | 12 | 0.000080 | 0.000032 |
| TRBV13   | TRBJ2-4 | 12 | 0.000080 | 0.000000 |
| TRBV16   | TRBJ1-5 | 12 | 0.000080 | 0.000000 |
| TRBV7-7  | TRBJ2-5 | 12 | 0.000080 | 0.000000 |
| TRBV12-5 | TRBJ1-3 | 11 | 0.000074 | 0.000530 |
| TRBV14   | TRBJ1-5 | 10 | 0.000067 | 0.000523 |
| TRBV7-3  | TRBJ1-4 | 10 | 0.000067 | 0.000224 |
| TRBV10-1 | TRBJ1-6 | 10 | 0.000067 | 0.000210 |
| TRBV10-2 | TRBJ1-6 | 10 | 0.000067 | 0.000000 |

|          |         |   |          |          |
|----------|---------|---|----------|----------|
| TRBV10-3 | TRBJ2-6 | 9 | 0.000060 | 0.004191 |
| TRBV10-3 | TRBJ1-4 | 9 | 0.000060 | 0.000953 |
| TRBV19   | TRBJ2-4 | 9 | 0.000060 | 0.000201 |
| TRBV4-2  | TRBJ2-4 | 9 | 0.000060 | 0.000000 |
| TRBV5-5  | TRBJ2-3 | 9 | 0.000060 | 0.000000 |
| TRBV6-9  | TRBJ1-6 | 9 | 0.000060 | 0.000000 |
| TRBV5-6  | TRBJ2-6 | 8 | 0.000053 | 0.000433 |
| TRBV28   | TRBJ2-4 | 8 | 0.000053 | 0.000418 |
| TRBV6-9  | TRBJ2-3 | 8 | 0.000053 | 0.000048 |
| TRBV4-2  | TRBJ2-6 | 8 | 0.000053 | 0.000000 |
| TRBV5-5  | TRBJ1-1 | 8 | 0.000053 | 0.000000 |
| TRBV5-5  | TRBJ2-2 | 8 | 0.000053 | 0.000000 |
| TRBV18   | TRBJ2-4 | 7 | 0.000047 | 0.000433 |
| TRBV24-1 | TRBJ2-4 | 7 | 0.000047 | 0.000068 |
| TRBV30   | TRBJ2-4 | 7 | 0.000047 | 0.000064 |
| TRBV10-2 | TRBJ2-5 | 7 | 0.000047 | 0.000000 |
| TRBV7-6  | TRBJ1-4 | 7 | 0.000047 | 0.000000 |
| TRBV5-6  | TRBJ1-4 | 6 | 0.000040 | 0.000000 |
| TRBV6-1  | TRBJ2-4 | 5 | 0.000033 | 0.001595 |
| TRBV10-1 | TRBJ1-4 | 5 | 0.000033 | 0.000124 |
| TRBV7-8  | TRBJ2-4 | 5 | 0.000033 | 0.000032 |
| TRBV5-3  | TRBJ1-5 | 5 | 0.000033 | 0.000000 |
| TRBV6-7  | TRBJ2-3 | 5 | 0.000033 | 0.000000 |
| TRBV7-4  | TRBJ1-1 | 5 | 0.000033 | 0.000000 |
| TRBV30   | TRBJ1-6 | 4 | 0.000027 | 0.000756 |
| TRBV5-6  | TRBJ1-6 | 4 | 0.000027 | 0.000163 |
| TRBV12-2 | TRBJ2-1 | 4 | 0.000027 | 0.000132 |
| TRBV23-1 | TRBJ2-4 | 4 | 0.000027 | 0.000032 |
| TRBV5-3  | TRBJ2-4 | 4 | 0.000027 | 0.000000 |
| TRBV6-3  | TRBJ2-1 | 4 | 0.000027 | 0.000000 |
| TRBV5-3  | TRBJ2-1 | 3 | 0.000020 | 0.000048 |
| TRBV3-2  | TRBJ1-4 | 3 | 0.000020 | 0.000036 |
| TRBV6-9  | TRBJ1-2 | 3 | 0.000020 | 0.000029 |
| TRBV16   | TRBJ2-7 | 3 | 0.000020 | 0.000000 |
| TRBV3-2  | TRBJ2-5 | 3 | 0.000020 | 0.000000 |
| TRBV6-3  | TRBJ2-5 | 3 | 0.000020 | 0.000000 |
| TRBV8-2  | TRBJ1-2 | 3 | 0.000020 | 0.000000 |
| TRBV8-2  | TRBJ2-3 | 3 | 0.000020 | 0.000000 |
| TRBV15   | TRBJ1-3 | 2 | 0.000013 | 0.000583 |
| TRBV11-3 | TRBJ1-6 | 2 | 0.000013 | 0.000108 |
| TRBV23-1 | TRBJ2-3 | 2 | 0.000013 | 0.000080 |
| TRBV11-2 | TRBJ2-4 | 2 | 0.000013 | 0.000032 |
| TRBV6-7  | TRBJ1-2 | 2 | 0.000013 | 0.000032 |

|          |         |   |          |          |
|----------|---------|---|----------|----------|
| TRBV12-2 | TRBJ1-2 | 2 | 0.000013 | 0.000000 |
| TRBV14   | TRBJ1-6 | 2 | 0.000013 | 0.000000 |
| TRBV23-1 | TRBJ2-2 | 2 | 0.000013 | 0.000000 |
| TRBV3-2  | TRBJ2-7 | 2 | 0.000013 | 0.000000 |
| TRBV5-3  | TRBJ2-5 | 2 | 0.000013 | 0.000000 |
| TRBV6-7  | TRBJ1-5 | 2 | 0.000013 | 0.000000 |
| TRBV6-7  | TRBJ2-5 | 2 | 0.000013 | 0.000000 |
| TRBV7-5  | TRBJ2-2 | 2 | 0.000013 | 0.000000 |
| TRBV8-2  | TRBJ1-3 | 2 | 0.000013 | 0.000000 |
| TRBV22-1 | TRBJ1-3 | 1 | 0.000007 | 0.001161 |
| TRBV3-2  | TRBJ1-1 | 1 | 0.000007 | 0.000433 |
| TRBV7-7  | TRBJ1-1 | 1 | 0.000007 | 0.000376 |
| TRBV7-3  | TRBJ2-4 | 1 | 0.000007 | 0.000356 |
| TRBV11-3 | TRBJ1-2 | 1 | 0.000007 | 0.000180 |
| TRBV7-4  | TRBJ1-4 | 1 | 0.000007 | 0.000112 |
| TRBV6-3  | TRBJ1-5 | 1 | 0.000007 | 0.000106 |
| TRBV29-1 | TRBJ1-6 | 1 | 0.000007 | 0.000096 |
| TRBV12-1 | TRBJ2-2 | 1 | 0.000007 | 0.000064 |
| TRBV12-5 | TRBJ2-6 | 1 | 0.000007 | 0.000064 |
| TRBV10-2 | TRBJ1-5 | 1 | 0.000007 | 0.000048 |
| TRBV30   | TRBJ2-6 | 1 | 0.000007 | 0.000048 |
| TRBV10-3 | TRBJ2-4 | 1 | 0.000007 | 0.000032 |
| TRBV5-3  | TRBJ2-3 | 1 | 0.000007 | 0.000032 |
| TRBV26   | TRBJ1-1 | 1 | 0.000007 | 0.000016 |
| TRBV11-1 | TRBJ1-3 | 1 | 0.000007 | 0.000000 |
| TRBV12-4 | TRBJ1-2 | 1 | 0.000007 | 0.000000 |
| TRBV16   | TRBJ2-1 | 1 | 0.000007 | 0.000000 |
| TRBV5-3  | TRBJ1-1 | 1 | 0.000007 | 0.000000 |
| TRBV5-8  | TRBJ1-6 | 1 | 0.000007 | 0.000000 |
| TRBV6-3  | TRBJ1-2 | 1 | 0.000007 | 0.000000 |
| TRBV6-3  | TRBJ2-2 | 1 | 0.000007 | 0.000000 |
| TRBV6-8  | TRBJ1-5 | 1 | 0.000007 | 0.000000 |
| TRBV6-9  | TRBJ2-1 | 1 | 0.000007 | 0.000000 |
| TRBV7-4  | TRBJ1-5 | 1 | 0.000007 | 0.000000 |
| TRBV7-7  | TRBJ2-3 | 1 | 0.000007 | 0.000000 |
| TRBV8-2  | TRBJ1-5 | 1 | 0.000007 | 0.000000 |
| TRBV8-2  | TRBJ2-1 | 1 | 0.000007 | 0.000000 |
| TRBV8-2  | TRBJ2-2 | 1 | 0.000007 | 0.000000 |
| TRBV8-2  | TRBJ2-7 | 1 | 0.000007 | 0.000000 |
| TRBV21-1 | TRBJ1-1 | 0 | 0.000000 | 0.003739 |
| TRBV21-1 | TRBJ2-7 | 0 | 0.000000 | 0.002067 |
| TRBV21-1 | TRBJ1-2 | 0 | 0.000000 | 0.001460 |
| TRBV21-1 | TRBJ2-5 | 0 | 0.000000 | 0.001320 |

|          |          |   |          |          |
|----------|----------|---|----------|----------|
| TRBV21-1 | TRBJ2-3  | 0 | 0.000000 | 0.001257 |
| TRBV12-2 | TRBJ2-7  | 0 | 0.000000 | 0.001109 |
| TRBV21-1 | TRBJ1-5  | 0 | 0.000000 | 0.000995 |
| TRBV5-4  | TRBJ2-2P | 0 | 0.000000 | 0.000956 |
| TRBV7-7  | TRBJ2-7  | 0 | 0.000000 | 0.000901 |
| TRBV21-1 | TRBJ2-1  | 0 | 0.000000 | 0.000873 |
| TRBV7-6  | TRBJ2-5  | 0 | 0.000000 | 0.000853 |
| TRBV21-1 | TRBJ1-4  | 0 | 0.000000 | 0.000829 |
| TRBV21-1 | TRBJ2-2  | 0 | 0.000000 | 0.000800 |
| TRBV7-4  | TRBJ2-6  | 0 | 0.000000 | 0.000530 |
| TRBV1    | TRBJ2-1  | 0 | 0.000000 | 0.000525 |
| TRBV22-1 | TRBJ2-7  | 0 | 0.000000 | 0.000473 |
| TRBV21-1 | TRBJ1-6  | 0 | 0.000000 | 0.000464 |
| TRBV5-2  | TRBJ2-4  | 0 | 0.000000 | 0.000459 |
| TRBV21-1 | TRBJ2-6  | 0 | 0.000000 | 0.000449 |
| TRBV5-2  | TRBJ1-5  | 0 | 0.000000 | 0.000433 |
| TRBV3-2  | TRBJ1-2  | 0 | 0.000000 | 0.000408 |
| TRBV5-3  | TRBJ1-3  | 0 | 0.000000 | 0.000408 |
| TRBV6-8  | TRBJ2-3  | 0 | 0.000000 | 0.000408 |
| TRBV6-3  | TRBJ2-4  | 0 | 0.000000 | 0.000355 |
| TRBV6-9  | TRBJ1-5  | 0 | 0.000000 | 0.000355 |
| TRBV12-1 | TRBJ2-1  | 0 | 0.000000 | 0.000344 |
| TRBV25-1 | TRBJ2-4  | 0 | 0.000000 | 0.000344 |
| TRBV12-2 | TRBJ1-6  | 0 | 0.000000 | 0.000336 |
| TRBV16   | TRBJ1-3  | 0 | 0.000000 | 0.000319 |
| TRBV26   | TRBJ1-2  | 0 | 0.000000 | 0.000298 |
| TRBV12-1 | TRBJ1-6  | 0 | 0.000000 | 0.000259 |
| TRBV1    | TRBJ2-5  | 0 | 0.000000 | 0.000250 |
| TRBV7-6  | TRBJ1-1  | 0 | 0.000000 | 0.000210 |
| TRBV3-1  | TRBJ2-2  | 0 | 0.000000 | 0.000193 |
| TRBV3-1  | TRBJ2-6  | 0 | 0.000000 | 0.000192 |
| TRBV6-3  | TRBJ2-7  | 0 | 0.000000 | 0.000163 |
| TRBV21-1 | TRBJ2-4  | 0 | 0.000000 | 0.000144 |
| TRBV1    | TRBJ2-7  | 0 | 0.000000 | 0.000134 |
| TRBV5-5  | TRBJ1-2  | 0 | 0.000000 | 0.000128 |
| TRBV1    | TRBJ2-2  | 0 | 0.000000 | 0.000115 |
| TRBV12-1 | TRBJ1-5  | 0 | 0.000000 | 0.000115 |
| TRBV23-1 | TRBJ2-6  | 0 | 0.000000 | 0.000108 |
| TRBV7-7  | TRBJ1-2  | 0 | 0.000000 | 0.000106 |
| TRBV3-2  | TRBJ1-3  | 0 | 0.000000 | 0.000096 |
| TRBV5-5  | TRBJ2-5  | 0 | 0.000000 | 0.000096 |
| TRBV12-2 | TRBJ1-3  | 0 | 0.000000 | 0.000096 |
| TRBV7-6  | TRBJ1-6  | 0 | 0.000000 | 0.000096 |

|          |         |   |          |          |
|----------|---------|---|----------|----------|
| TRBV21-1 | TRBJ1-3 | 0 | 0.000000 | 0.000093 |
| TRBV10-2 | TRBJ1-3 | 0 | 0.000000 | 0.000086 |
| TRBV10-2 | TRBJ1-4 | 0 | 0.000000 | 0.000082 |
| TRBV6-3  | TRBJ1-1 | 0 | 0.000000 | 0.000082 |
| TRBV12-1 | TRBJ2-3 | 0 | 0.000000 | 0.000072 |
| TRBV3-2  | TRBJ2-2 | 0 | 0.000000 | 0.000072 |
| TRBV7-4  | TRBJ2-4 | 0 | 0.000000 | 0.000072 |
| TRBV6-7  | TRBJ2-1 | 0 | 0.000000 | 0.000068 |
| TRBV11-1 | TRBJ1-4 | 0 | 0.000000 | 0.000064 |
| TRBV3-2  | TRBJ1-5 | 0 | 0.000000 | 0.000048 |
| TRBV1    | TRBJ1-1 | 0 | 0.000000 | 0.000048 |
| TRBV7-1  | TRBJ1-4 | 0 | 0.000000 | 0.000048 |
| TRBV12-2 | TRBJ1-5 | 0 | 0.000000 | 0.000036 |
| TRBV3-2  | TRBJ2-3 | 0 | 0.000000 | 0.000036 |
| TRBV6-6  | TRBJ2-4 | 0 | 0.000000 | 0.000036 |
| TRBV16   | TRBJ1-6 | 0 | 0.000000 | 0.000032 |
| TRBV8-2  | TRBJ1-4 | 0 | 0.000000 | 0.000032 |
| TRBV1    | TRBJ1-2 | 0 | 0.000000 | 0.000032 |
| TRBV6-7  | TRBJ2-4 | 0 | 0.000000 | 0.000032 |
| TRBV7-5  | TRBJ1-3 | 0 | 0.000000 | 0.000032 |
| TRBV5-5  | TRBJ2-4 | 0 | 0.000000 | 0.000029 |
| TRBV1    | TRBJ2-3 | 0 | 0.000000 | 0.000016 |
| TRBV5-8  | TRBJ1-3 | 0 | 0.000000 | 0.000016 |
| TRBV7-8  | TRBJ2-6 | 0 | 0.000000 | 0.000016 |

Table 9: VJ rearrangements called by MIXCR for A037 fragments collected by Lymphotrack PCR and single CapTCR-Seq run

| V.gene   | J.gene  | Count.A037.PCR | Prop.A037.PCR | Count.A037.Cap | Prop.A037.Cap |
|----------|---------|----------------|---------------|----------------|---------------|
| TRBV3-1  | TRBJ1-1 | 4382           | 0.029303588   | 1              | 0.000546448   |
| TRBV20-1 | TRBJ2-7 | 2788           | 0.01864409    | 40             | 0.021857923   |
| TRBV14   | TRBJ2-7 | 2422           | 0.016196552   | 1              | 0.000546448   |
| TRBV3-1  | TRBJ2-7 | 2374           | 0.015875563   | 2              | 0.001092896   |
| TRBV9    | TRBJ1-1 | 2134           | 0.01427062    | 11             | 0.006010929   |
| TRBV20-1 | TRBJ1-1 | 1726           | 0.011542217   | 18             | 0.009836066   |
| TRBV14   | TRBJ1-2 | 1724           | 0.011528842   | 2              | 0.001092896   |
| TRBV3-1  | TRBJ1-5 | 1526           | 0.010204764   | 0              | 0             |
| TRBV2    | TRBJ1-2 | 1421           | 0.009502601   | 11             | 0.006010929   |
| TRBV14   | TRBJ1-1 | 1352           | 0.00904118    | 0              | 0             |
| TRBV4-3  | TRBJ1-1 | 1324           | 0.008853937   | 1              | 0.000546448   |
| TRBV4-1  | TRBJ2-7 | 1273           | 0.008512886   | 5              | 0.00273224    |
| TRBV3-1  | TRBJ1-2 | 1272           | 0.008506199   | 0              | 0             |
| TRBV20-1 | TRBJ1-2 | 1269           | 0.008486137   | 7              | 0.003825137   |
| TRBV20-1 | TRBJ2-1 | 1177           | 0.007870909   | 11             | 0.006010929   |
| TRBV18   | TRBJ2-7 | 1143           | 0.007643542   | 6              | 0.003278689   |
| TRBV6-1  | TRBJ2-7 | 1132           | 0.007569982   | 19             | 0.010382514   |
| TRBV7-9  | TRBJ2-7 | 1104           | 0.007382739   | 2              | 0.001092896   |
| TRBV9    | TRBJ2-7 | 1095           | 0.007322553   | 11             | 0.006010929   |
| TRBV28   | TRBJ2-7 | 1080           | 0.007222245   | 24             | 0.013114754   |
| TRBV2    | TRBJ1-5 | 1076           | 0.007195495   | 3              | 0.001639344   |
| TRBV6-5  | TRBJ2-7 | 1055           | 0.007055063   | 4              | 0.002185792   |
| TRBV2    | TRBJ2-7 | 1007           | 0.006734074   | 8              | 0.004371585   |
| TRBV2    | TRBJ1-1 | 999            | 0.006680576   | 11             | 0.006010929   |
| TRBV7-9  | TRBJ1-1 | 981            | 0.006560205   | 12             | 0.006557377   |
| TRBV14   | TRBJ2-1 | 957            | 0.006399711   | 2              | 0.001092896   |
| TRBV9    | TRBJ2-1 | 957            | 0.006399711   | 10             | 0.005464481   |
| TRBV6-4  | TRBJ2-2 | 894            | 0.005978414   | 0              | 0             |
| TRBV20-1 | TRBJ1-6 | 887            | 0.005931603   | 9              | 0.004918033   |
| TRBV4-1  | TRBJ1-1 | 867            | 0.005797857   | 3              | 0.001639344   |
| TRBV4-3  | TRBJ2-7 | 831            | 0.005557116   | 0              | 0             |
| TRBV7-2  | TRBJ2-7 | 808            | 0.005403309   | 5              | 0.00273224    |
| TRBV4-3  | TRBJ1-2 | 803            | 0.005369873   | 0              | 0             |
| TRBV4-2  | TRBJ2-7 | 798            | 0.005336436   | 0              | 0             |
| TRBV20-1 | TRBJ2-5 | 776            | 0.005189316   | 11             | 0.006010929   |
| TRBV20-1 | TRBJ1-5 | 749            | 0.00500876    | 15             | 0.008196721   |
| TRBV6-4  | TRBJ2-7 | 724            | 0.004841579   | 6              | 0.003278689   |
| TRBV7-9  | TRBJ1-2 | 722            | 0.004828204   | 2              | 0.001092896   |
| TRBV6-5  | TRBJ1-1 | 719            | 0.004808142   | 2              | 0.001092896   |

|          |         |     |             |    |             |
|----------|---------|-----|-------------|----|-------------|
| TRBV3-1  | TRBJ2-1 | 715 | 0.004781393 | 15 | 0.008196721 |
| TRBV9    | TRBJ1-2 | 703 | 0.004701146 | 3  | 0.001639344 |
| TRBV7-8  | TRBJ2-7 | 689 | 0.004607525 | 6  | 0.003278689 |
| TRBV6-4  | TRBJ1-5 | 680 | 0.004547339 | 2  | 0.001092896 |
| TRBV11-2 | TRBJ2-7 | 652 | 0.004360096 | 0  | 0           |
| TRBV20-1 | TRBJ2-3 | 648 | 0.004333347 | 15 | 0.008196721 |
| TRBV4-1  | TRBJ1-2 | 641 | 0.004286536 | 11 | 0.006010929 |
| TRBV18   | TRBJ1-1 | 636 | 0.0042531   | 9  | 0.004918033 |
| TRBV5-1  | TRBJ2-7 | 631 | 0.004219663 | 3  | 0.001639344 |
| TRBV5-1  | TRBJ1-2 | 613 | 0.004099292 | 12 | 0.006557377 |
| TRBV15   | TRBJ2-7 | 613 | 0.004099292 | 0  | 0           |
| TRBV6-4  | TRBJ2-1 | 603 | 0.00403242  | 3  | 0.001639344 |
| TRBV29-1 | TRBJ1-1 | 597 | 0.003992296 | 9  | 0.004918033 |
| TRBV9    | TRBJ2-3 | 585 | 0.003912049 | 9  | 0.004918033 |
| TRBV7-2  | TRBJ1-2 | 584 | 0.003905362 | 2  | 0.001092896 |
| TRBV28   | TRBJ1-1 | 573 | 0.003831802 | 8  | 0.004371585 |
| TRBV6-5  | TRBJ1-2 | 556 | 0.003718118 | 6  | 0.003278689 |
| TRBV4-2  | TRBJ1-2 | 538 | 0.003597748 | 0  | 0           |
| TRBV29-1 | TRBJ2-7 | 529 | 0.003537562 | 7  | 0.003825137 |
| TRBV2    | TRBJ2-1 | 529 | 0.003537562 | 9  | 0.004918033 |
| TRBV6-4  | TRBJ1-1 | 527 | 0.003524188 | 6  | 0.003278689 |
| TRBV7-2  | TRBJ2-1 | 515 | 0.003443941 | 0  | 0           |
| TRBV11-2 | TRBJ1-1 | 510 | 0.003410504 | 2  | 0.001092896 |
| TRBV6-4  | TRBJ2-3 | 507 | 0.003390443 | 5  | 0.00273224  |
| TRBV7-3  | TRBJ1-1 | 503 | 0.003363694 | 6  | 0.003278689 |
| TRBV6-4  | TRBJ1-2 | 491 | 0.003283446 | 0  | 0           |
| TRBV28   | TRBJ1-2 | 485 | 0.003243323 | 5  | 0.00273224  |
| TRBV3-1  | TRBJ2-3 | 481 | 0.003216574 | 1  | 0.000546448 |
| TRBV19   | TRBJ2-7 | 481 | 0.003216574 | 15 | 0.008196721 |
| TRBV20-1 | TRBJ1-4 | 471 | 0.003149701 | 3  | 0.001639344 |
| TRBV27   | TRBJ2-7 | 460 | 0.003076141 | 15 | 0.008196721 |
| TRBV7-2  | TRBJ1-1 | 447 | 0.002989207 | 5  | 0.00273224  |
| TRBV2    | TRBJ2-5 | 443 | 0.002962458 | 9  | 0.004918033 |
| TRBV7-2  | TRBJ1-5 | 439 | 0.002935709 | 3  | 0.001639344 |
| TRBV20-1 | TRBJ2-2 | 433 | 0.002895585 | 7  | 0.003825137 |
| TRBV2    | TRBJ1-4 | 415 | 0.002775214 | 2  | 0.001092896 |
| TRBV9    | TRBJ1-5 | 406 | 0.002715029 | 7  | 0.003825137 |
| TRBV15   | TRBJ1-2 | 403 | 0.002694967 | 2  | 0.001092896 |
| TRBV7-3  | TRBJ2-7 | 401 | 0.002681593 | 8  | 0.004371585 |
| TRBV15   | TRBJ1-5 | 400 | 0.002674905 | 1  | 0.000546448 |
| TRBV14   | TRBJ2-2 | 391 | 0.00261472  | 2  | 0.001092896 |
| TRBV5-1  | TRBJ1-1 | 384 | 0.002567909 | 3  | 0.001639344 |
| TRBV3-1  | TRBJ2-5 | 380 | 0.00254116  | 0  | 0           |

|          |         |     |             |    |             |
|----------|---------|-----|-------------|----|-------------|
| TRBV6-1  | TRBJ1-1 | 379 | 0.002534473 | 3  | 0.001639344 |
| TRBV4-2  | TRBJ1-5 | 376 | 0.002514411 | 0  | 0           |
| TRBV7-3  | TRBJ2-1 | 372 | 0.002487662 | 1  | 0.000546448 |
| TRBV19   | TRBJ1-1 | 371 | 0.002480975 | 13 | 0.007103825 |
| TRBV13   | TRBJ2-7 | 366 | 0.002447538 | 2  | 0.001092896 |
| TRBV4-1  | TRBJ1-4 | 359 | 0.002400728 | 2  | 0.001092896 |
| TRBV18   | TRBJ1-2 | 359 | 0.002400728 | 9  | 0.004918033 |
| TRBV4-2  | TRBJ2-1 | 358 | 0.00239404  | 0  | 0           |
| TRBV2    | TRBJ2-2 | 357 | 0.002387353 | 5  | 0.00273224  |
| TRBV4-3  | TRBJ2-1 | 351 | 0.002347229 | 0  | 0           |
| TRBV6-5  | TRBJ2-1 | 349 | 0.002333855 | 3  | 0.001639344 |
| TRBV6-5  | TRBJ1-5 | 348 | 0.002327168 | 5  | 0.00273224  |
| TRBV9    | TRBJ1-4 | 348 | 0.002327168 | 5  | 0.00273224  |
| TRBV4-1  | TRBJ2-1 | 345 | 0.002307106 | 4  | 0.002185792 |
| TRBV11-2 | TRBJ1-2 | 342 | 0.002287044 | 5  | 0.00273224  |
| TRBV4-1  | TRBJ1-5 | 340 | 0.00227367  | 2  | 0.001092896 |
| TRBV4-2  | TRBJ1-1 | 338 | 0.002260295 | 2  | 0.001092896 |
| TRBV9    | TRBJ2-2 | 326 | 0.002180048 | 4  | 0.002185792 |
| TRBV14   | TRBJ1-4 | 325 | 0.002173361 | 0  | 0           |
| TRBV4-1  | TRBJ2-2 | 322 | 0.002153299 | 0  | 0           |
| TRBV4-3  | TRBJ2-3 | 322 | 0.002153299 | 0  | 0           |
| TRBV7-9  | TRBJ1-5 | 316 | 0.002113175 | 4  | 0.002185792 |
| TRBV29-1 | TRBJ1-5 | 310 | 0.002073052 | 6  | 0.003278689 |
| TRBV6-6  | TRBJ2-7 | 306 | 0.002046303 | 2  | 0.001092896 |
| TRBV6-6  | TRBJ1-1 | 304 | 0.002032928 | 4  | 0.002185792 |
| TRBV12-5 | TRBJ1-1 | 304 | 0.002032928 | 0  | 0           |
| TRBV6-4  | TRBJ2-5 | 292 | 0.001952681 | 2  | 0.001092896 |
| TRBV5-8  | TRBJ2-1 | 292 | 0.001952681 | 0  | 0           |
| TRBV7-9  | TRBJ2-1 | 291 | 0.001945994 | 10 | 0.005464481 |
| TRBV5-6  | TRBJ2-7 | 282 | 0.001885808 | 0  | 0           |
| TRBV9    | TRBJ2-5 | 281 | 0.001879121 | 3  | 0.001639344 |
| TRBV2    | TRBJ2-3 | 281 | 0.001879121 | 7  | 0.003825137 |
| TRBV5-4  | TRBJ2-7 | 280 | 0.001872434 | 4  | 0.002185792 |
| TRBV15   | TRBJ2-1 | 279 | 0.001865746 | 2  | 0.001092896 |
| TRBV5-8  | TRBJ1-4 | 279 | 0.001865746 | 0  | 0           |
| TRBV4-2  | TRBJ2-2 | 278 | 0.001859059 | 2  | 0.001092896 |
| TRBV11-2 | TRBJ2-1 | 275 | 0.001838997 | 0  | 0           |
| TRBV28   | TRBJ1-5 | 263 | 0.00175875  | 9  | 0.004918033 |
| TRBV7-8  | TRBJ1-1 | 262 | 0.001752063 | 3  | 0.001639344 |
| TRBV30   | TRBJ2-7 | 262 | 0.001752063 | 4  | 0.002185792 |
| TRBV4-1  | TRBJ2-3 | 254 | 0.001698565 | 1  | 0.000546448 |
| TRBV27   | TRBJ1-5 | 254 | 0.001698565 | 8  | 0.004371585 |
| TRBV27   | TRBJ1-2 | 253 | 0.001691878 | 6  | 0.003278689 |

|          |         |     |             |    |             |
|----------|---------|-----|-------------|----|-------------|
| TRBV14   | TRBJ2-3 | 249 | 0.001665129 | 0  | 0           |
| TRBV27   | TRBJ1-1 | 245 | 0.00163838  | 17 | 0.009289617 |
| TRBV29-1 | TRBJ2-1 | 243 | 0.001625005 | 2  | 0.001092896 |
| TRBV29-1 | TRBJ1-2 | 243 | 0.001625005 | 3  | 0.001639344 |
| TRBV7-2  | TRBJ2-5 | 240 | 0.001604943 | 4  | 0.002185792 |
| TRBV4-3  | TRBJ1-6 | 240 | 0.001604943 | 0  | 0           |
| TRBV5-8  | TRBJ1-2 | 237 | 0.001584881 | 0  | 0           |
| TRBV4-2  | TRBJ2-3 | 233 | 0.001558132 | 0  | 0           |
| TRBV7-9  | TRBJ2-3 | 231 | 0.001544758 | 8  | 0.004371585 |
| TRBV4-3  | TRBJ1-5 | 231 | 0.001544758 | 0  | 0           |
| TRBV19   | TRBJ2-2 | 229 | 0.001531383 | 6  | 0.003278689 |
| TRBV4-2  | TRBJ1-4 | 227 | 0.001518009 | 0  | 0           |
| TRBV28   | TRBJ2-1 | 225 | 0.001504634 | 4  | 0.002185792 |
| TRBV15   | TRBJ2-3 | 222 | 0.001484572 | 3  | 0.001639344 |
| TRBV6-6  | TRBJ2-1 | 222 | 0.001484572 | 12 | 0.006557377 |
| TRBV11-3 | TRBJ2-1 | 222 | 0.001484572 | 0  | 0           |
| TRBV18   | TRBJ1-5 | 220 | 0.001471198 | 4  | 0.002185792 |
| TRBV25-1 | TRBJ1-1 | 219 | 0.001464511 | 1  | 0.000546448 |
| TRBV7-3  | TRBJ1-2 | 218 | 0.001457823 | 1  | 0.000546448 |
| TRBV5-1  | TRBJ2-5 | 218 | 0.001457823 | 4  | 0.002185792 |
| TRBV12-5 | TRBJ1-2 | 217 | 0.001451136 | 2  | 0.001092896 |
| TRBV3-1  | TRBJ1-4 | 210 | 0.001404325 | 2  | 0.001092896 |
| TRBV7-2  | TRBJ2-3 | 210 | 0.001404325 | 5  | 0.00273224  |
| TRBV14   | TRBJ2-5 | 209 | 0.001397638 | 4  | 0.002185792 |
| TRBV4-1  | TRBJ2-5 | 209 | 0.001397638 | 4  | 0.002185792 |
| TRBV2    | TRBJ1-6 | 209 | 0.001397638 | 0  | 0           |
| TRBV7-9  | TRBJ2-2 | 208 | 0.001390951 | 1  | 0.000546448 |
| TRBV6-5  | TRBJ2-5 | 208 | 0.001390951 | 2  | 0.001092896 |
| TRBV6-5  | TRBJ2-3 | 205 | 0.001370889 | 0  | 0           |
| TRBV19   | TRBJ1-2 | 204 | 0.001364202 | 10 | 0.005464481 |
| TRBV12-5 | TRBJ2-7 | 203 | 0.001357514 | 1  | 0.000546448 |
| TRBV10-3 | TRBJ2-7 | 202 | 0.001350827 | 8  | 0.004371585 |
| TRBV6-1  | TRBJ1-2 | 201 | 0.00134414  | 0  | 0           |
| TRBV7-3  | TRBJ2-3 | 200 | 0.001337453 | 8  | 0.004371585 |
| TRBV19   | TRBJ2-1 | 198 | 0.001324078 | 12 | 0.006557377 |
| TRBV4-2  | TRBJ2-5 | 197 | 0.001317391 | 2  | 0.001092896 |
| TRBV29-1 | TRBJ2-3 | 195 | 0.001304016 | 1  | 0.000546448 |
| TRBV7-3  | TRBJ2-2 | 194 | 0.001297329 | 0  | 0           |
| TRBV7-9  | TRBJ1-4 | 189 | 0.001263893 | 3  | 0.001639344 |
| TRBV5-4  | TRBJ1-2 | 187 | 0.001250518 | 4  | 0.002185792 |
| TRBV6-5  | TRBJ2-2 | 187 | 0.001250518 | 0  | 0           |
| TRBV15   | TRBJ1-4 | 183 | 0.001223769 | 0  | 0           |
| TRBV13   | TRBJ1-1 | 182 | 0.001217082 | 0  | 0           |

|          |         |     |             |    |             |
|----------|---------|-----|-------------|----|-------------|
| TRBV3-1  | TRBJ1-3 | 181 | 0.001210395 | 0  | 0           |
| TRBV4-3  | TRBJ1-3 | 180 | 0.001203707 | 0  | 0           |
| TRBV7-8  | TRBJ1-5 | 178 | 0.001190333 | 1  | 0.000546448 |
| TRBV5-3  | TRBJ1-4 | 177 | 0.001183646 | 13 | 0.007103825 |
| TRBV25-1 | TRBJ1-2 | 175 | 0.001170271 | 2  | 0.001092896 |
| TRBV19   | TRBJ1-5 | 172 | 0.001150209 | 5  | 0.00273224  |
| TRBV29-1 | TRBJ2-5 | 170 | 0.001136835 | 2  | 0.001092896 |
| TRBV24-1 | TRBJ1-1 | 169 | 0.001130148 | 1  | 0.000546448 |
| TRBV6-4  | TRBJ1-4 | 169 | 0.001130148 | 1  | 0.000546448 |
| TRBV6-4  | TRBJ2-6 | 169 | 0.001130148 | 2  | 0.001092896 |
| TRBV10-1 | TRBJ2-7 | 168 | 0.00112346  | 0  | 0           |
| TRBV7-9  | TRBJ2-5 | 164 | 0.001096711 | 2  | 0.001092896 |
| TRBV11-3 | TRBJ1-1 | 164 | 0.001096711 | 0  | 0           |
| TRBV23-1 | TRBJ2-7 | 159 | 0.001063275 | 3  | 0.001639344 |
| TRBV7-2  | TRBJ2-2 | 158 | 0.001056588 | 4  | 0.002185792 |
| TRBV2    | TRBJ1-3 | 157 | 0.0010499   | 1  | 0.000546448 |
| TRBV15   | TRBJ1-1 | 157 | 0.0010499   | 0  | 0           |
| TRBV6-6  | TRBJ1-5 | 156 | 0.001043213 | 2  | 0.001092896 |
| TRBV7-8  | TRBJ1-3 | 156 | 0.001043213 | 2  | 0.001092896 |
| TRBV5-1  | TRBJ2-3 | 154 | 0.001029839 | 9  | 0.004918033 |
| TRBV5-8  | TRBJ1-5 | 154 | 0.001029839 | 0  | 0           |
| TRBV11-3 | TRBJ2-2 | 153 | 0.001023151 | 0  | 0           |
| TRBV15   | TRBJ1-6 | 153 | 0.001023151 | 0  | 0           |
| TRBV5-6  | TRBJ1-1 | 153 | 0.001023151 | 0  | 0           |
| TRBV7-4  | TRBJ2-7 | 153 | 0.001023151 | 0  | 0           |
| TRBV25-1 | TRBJ2-7 | 152 | 0.001016464 | 2  | 0.001092896 |
| TRBV4-2  | TRBJ1-3 | 150 | 0.00100309  | 0  | 0           |
| TRBV5-4  | TRBJ1-1 | 149 | 0.000996402 | 1  | 0.000546448 |
| TRBV6-5  | TRBJ1-3 | 149 | 0.000996402 | 2  | 0.001092896 |
| TRBV5-4  | TRBJ2-1 | 146 | 0.00097634  | 0  | 0           |
| TRBV6-1  | TRBJ2-1 | 145 | 0.000969653 | 1  | 0.000546448 |
| TRBV5-6  | TRBJ2-1 | 143 | 0.000956279 | 0  | 0           |
| TRBV10-3 | TRBJ1-5 | 142 | 0.000949591 | 5  | 0.00273224  |
| TRBV11-2 | TRBJ2-3 | 141 | 0.000942904 | 1  | 0.000546448 |
| TRBV6-1  | TRBJ1-5 | 140 | 0.000936217 | 1  | 0.000546448 |
| TRBV18   | TRBJ2-1 | 139 | 0.00092953  | 2  | 0.001092896 |
| TRBV11-3 | TRBJ2-7 | 136 | 0.000909468 | 0  | 0           |
| TRBV18   | TRBJ2-5 | 135 | 0.000902781 | 0  | 0           |
| TRBV6-6  | TRBJ1-2 | 134 | 0.000896093 | 0  | 0           |
| TRBV18   | TRBJ2-2 | 130 | 0.000869344 | 2  | 0.001092896 |
| TRBV19   | TRBJ1-4 | 130 | 0.000869344 | 5  | 0.00273224  |
| TRBV18   | TRBJ1-4 | 130 | 0.000869344 | 7  | 0.003825137 |
| TRBV11-2 | TRBJ1-4 | 128 | 0.00085597  | 0  | 0           |

|          |         |     |             |   |             |
|----------|---------|-----|-------------|---|-------------|
| TRBV7-3  | TRBJ1-5 | 128 | 0.00085597  | 0 | 0           |
| TRBV7-8  | TRBJ1-2 | 127 | 0.000849282 | 1 | 0.000546448 |
| TRBV25-1 | TRBJ1-5 | 126 | 0.000842595 | 2 | 0.001092896 |
| TRBV10-3 | TRBJ1-1 | 125 | 0.000835908 | 5 | 0.00273224  |
| TRBV7-8  | TRBJ2-1 | 125 | 0.000835908 | 0 | 0           |
| TRBV12-5 | TRBJ1-5 | 123 | 0.000822533 | 0 | 0           |
| TRBV25-1 | TRBJ2-1 | 123 | 0.000822533 | 0 | 0           |
| TRBV6-5  | TRBJ1-6 | 122 | 0.000815846 | 3 | 0.001639344 |
| TRBV28   | TRBJ2-5 | 121 | 0.000809159 | 2 | 0.001092896 |
| TRBV9    | TRBJ2-6 | 121 | 0.000809159 | 0 | 0           |
| TRBV15   | TRBJ2-5 | 120 | 0.000802472 | 0 | 0           |
| TRBV5-6  | TRBJ1-2 | 119 | 0.000795784 | 0 | 0           |
| TRBV7-3  | TRBJ2-5 | 119 | 0.000795784 | 0 | 0           |
| TRBV30   | TRBJ1-5 | 118 | 0.000789097 | 2 | 0.001092896 |
| TRBV20-1 | TRBJ1-3 | 117 | 0.00078241  | 3 | 0.001639344 |
| TRBV5-1  | TRBJ1-4 | 117 | 0.00078241  | 8 | 0.004371585 |
| TRBV18   | TRBJ1-3 | 116 | 0.000775723 | 2 | 0.001092896 |
| TRBV10-3 | TRBJ1-2 | 116 | 0.000775723 | 0 | 0           |
| TRBV27   | TRBJ2-2 | 114 | 0.000762348 | 1 | 0.000546448 |
| TRBV5-8  | TRBJ1-1 | 114 | 0.000762348 | 1 | 0.000546448 |
| TRBV28   | TRBJ2-3 | 114 | 0.000762348 | 7 | 0.003825137 |
| TRBV12-5 | TRBJ2-5 | 112 | 0.000748974 | 0 | 0           |
| TRBV6-1  | TRBJ1-4 | 111 | 0.000742286 | 7 | 0.003825137 |
| TRBV13   | TRBJ1-2 | 111 | 0.000742286 | 0 | 0           |
| TRBV14   | TRBJ2-6 | 111 | 0.000742286 | 0 | 0           |
| TRBV4-3  | TRBJ2-2 | 111 | 0.000742286 | 0 | 0           |
| TRBV11-2 | TRBJ2-5 | 110 | 0.000735599 | 0 | 0           |
| TRBV28   | TRBJ2-2 | 109 | 0.000728912 | 1 | 0.000546448 |
| TRBV18   | TRBJ2-3 | 109 | 0.000728912 | 2 | 0.001092896 |
| TRBV6-1  | TRBJ2-3 | 109 | 0.000728912 | 2 | 0.001092896 |
| TRBV29-1 | TRBJ2-2 | 109 | 0.000728912 | 0 | 0           |
| TRBV9    | TRBJ1-6 | 109 | 0.000728912 | 0 | 0           |
| TRBV5-4  | TRBJ2-3 | 107 | 0.000715537 | 1 | 0.000546448 |
| TRBV7-2  | TRBJ1-6 | 104 | 0.000695475 | 1 | 0.000546448 |
| TRBV5-1  | TRBJ2-1 | 104 | 0.000695475 | 7 | 0.003825137 |
| TRBV27   | TRBJ2-1 | 103 | 0.000688788 | 5 | 0.00273224  |
| TRBV29-1 | TRBJ1-4 | 103 | 0.000688788 | 0 | 0           |
| TRBV6-4  | TRBJ1-6 | 102 | 0.000682101 | 2 | 0.001092896 |
| TRBV3-1  | TRBJ2-4 | 102 | 0.000682101 | 0 | 0           |
| TRBV7-3  | TRBJ1-6 | 101 | 0.000675414 | 0 | 0           |
| TRBV28   | TRBJ1-3 | 100 | 0.000668726 | 2 | 0.001092896 |
| TRBV4-1  | TRBJ1-6 | 100 | 0.000668726 | 0 | 0           |
| TRBV11-2 | TRBJ1-5 | 97  | 0.000648665 | 0 | 0           |

|          |         |    |             |    |             |
|----------|---------|----|-------------|----|-------------|
| TRBV11-3 | TRBJ2-3 | 97 | 0.000648665 | 0  | 0           |
| TRBV12-5 | TRBJ2-2 | 97 | 0.000648665 | 0  | 0           |
| TRBV25-1 | TRBJ1-6 | 97 | 0.000648665 | 0  | 0           |
| TRBV7-8  | TRBJ2-2 | 96 | 0.000641977 | 0  | 0           |
| TRBV18   | TRBJ1-6 | 95 | 0.00063529  | 1  | 0.000546448 |
| TRBV5-1  | TRBJ1-5 | 95 | 0.00063529  | 1  | 0.000546448 |
| TRBV9    | TRBJ1-3 | 95 | 0.00063529  | 4  | 0.002185792 |
| TRBV13   | TRBJ1-5 | 94 | 0.000628603 | 0  | 0           |
| TRBV20-1 | TRBJ2-4 | 93 | 0.000621915 | 3  | 0.001639344 |
| TRBV12-5 | TRBJ1-4 | 92 | 0.000615228 | 0  | 0           |
| TRBV6-1  | TRBJ2-5 | 91 | 0.000608541 | 2  | 0.001092896 |
| TRBV10-1 | TRBJ2-1 | 90 | 0.000601854 | 1  | 0.000546448 |
| TRBV4-1  | TRBJ1-3 | 90 | 0.000601854 | 0  | 0           |
| TRBV5-4  | TRBJ1-4 | 90 | 0.000601854 | 0  | 0           |
| TRBV12-5 | TRBJ2-1 | 89 | 0.000595166 | 2  | 0.001092896 |
| TRBV6-5  | TRBJ2-6 | 88 | 0.000588479 | 1  | 0.000546448 |
| TRBV25-1 | TRBJ2-2 | 87 | 0.000581792 | 1  | 0.000546448 |
| TRBV24-1 | TRBJ1-2 | 86 | 0.000575105 | 3  | 0.001639344 |
| TRBV5-8  | TRBJ2-5 | 86 | 0.000575105 | 0  | 0           |
| TRBV14   | TRBJ1-3 | 85 | 0.000568417 | 1  | 0.000546448 |
| TRBV27   | TRBJ2-3 | 85 | 0.000568417 | 11 | 0.006010929 |
| TRBV19   | TRBJ2-5 | 84 | 0.00056173  | 3  | 0.001639344 |
| TRBV20-1 | TRBJ2-6 | 84 | 0.00056173  | 3  | 0.001639344 |
| TRBV10-1 | TRBJ1-2 | 83 | 0.000555043 | 2  | 0.001092896 |
| TRBV5-6  | TRBJ2-5 | 82 | 0.000548356 | 0  | 0           |
| TRBV30   | TRBJ1-2 | 81 | 0.000541668 | 2  | 0.001092896 |
| TRBV10-3 | TRBJ2-5 | 80 | 0.000534981 | 4  | 0.002185792 |
| TRBV30   | TRBJ1-1 | 78 | 0.000521607 | 1  | 0.000546448 |
| TRBV10-1 | TRBJ1-1 | 78 | 0.000521607 | 0  | 0           |
| TRBV24-1 | TRBJ2-7 | 76 | 0.000508232 | 3  | 0.001639344 |
| TRBV11-1 | TRBJ2-1 | 75 | 0.000501545 | 0  | 0           |
| TRBV24-1 | TRBJ1-5 | 74 | 0.000494857 | 2  | 0.001092896 |
| TRBV10-3 | TRBJ2-1 | 73 | 0.00048817  | 5  | 0.00273224  |
| TRBV10-2 | TRBJ1-1 | 72 | 0.000481483 | 1  | 0.000546448 |
| TRBV7-8  | TRBJ1-6 | 72 | 0.000481483 | 1  | 0.000546448 |
| TRBV7-4  | TRBJ1-2 | 72 | 0.000481483 | 2  | 0.001092896 |
| TRBV11-3 | TRBJ2-5 | 71 | 0.000474796 | 0  | 0           |
| TRBV13   | TRBJ1-4 | 71 | 0.000474796 | 0  | 0           |
| TRBV7-9  | TRBJ1-3 | 70 | 0.000468108 | 10 | 0.005464481 |
| TRBV6-6  | TRBJ2-3 | 70 | 0.000468108 | 0  | 0           |
| TRBV7-3  | TRBJ2-6 | 70 | 0.000468108 | 0  | 0           |
| TRBV7-9  | TRBJ1-6 | 68 | 0.000454734 | 2  | 0.001092896 |
| TRBV15   | TRBJ2-4 | 67 | 0.000448047 | 2  | 0.001092896 |

|          |         |    |             |    |             |
|----------|---------|----|-------------|----|-------------|
| TRBV24-1 | TRBJ2-1 | 67 | 0.000448047 | 12 | 0.006557377 |
| TRBV23-1 | TRBJ1-6 | 67 | 0.000448047 | 0  | 0           |
| TRBV30   | TRBJ2-1 | 66 | 0.000441359 | 1  | 0.000546448 |
| TRBV23-1 | TRBJ1-5 | 66 | 0.000441359 | 0  | 0           |
| TRBV6-8  | TRBJ2-7 | 65 | 0.000434672 | 5  | 0.00273224  |
| TRBV5-8  | TRBJ2-2 | 65 | 0.000434672 | 0  | 0           |
| TRBV11-2 | TRBJ1-6 | 64 | 0.000427985 | 0  | 0           |
| TRBV24-1 | TRBJ2-2 | 63 | 0.000421298 | 0  | 0           |
| TRBV6-6  | TRBJ2-2 | 63 | 0.000421298 | 0  | 0           |
| TRBV11-2 | TRBJ2-2 | 62 | 0.00041461  | 1  | 0.000546448 |
| TRBV5-8  | TRBJ2-7 | 62 | 0.00041461  | 2  | 0.001092896 |
| TRBV13   | TRBJ2-5 | 62 | 0.00041461  | 0  | 0           |
| TRBV5-6  | TRBJ1-5 | 62 | 0.00041461  | 0  | 0           |
| TRBV7-4  | TRBJ2-3 | 62 | 0.00041461  | 0  | 0           |
| TRBV2    | TRBJ2-6 | 61 | 0.000407923 | 0  | 0           |
| TRBV7-2  | TRBJ1-4 | 60 | 0.000401236 | 0  | 0           |
| TRBV11-1 | TRBJ2-7 | 59 | 0.000394549 | 1  | 0.000546448 |
| TRBV5-1  | TRBJ1-3 | 59 | 0.000394549 | 1  | 0.000546448 |
| TRBV25-1 | TRBJ2-3 | 59 | 0.000394549 | 2  | 0.001092896 |
| TRBV5-8  | TRBJ2-3 | 59 | 0.000394549 | 0  | 0           |
| TRBV6-4  | TRBJ1-3 | 59 | 0.000394549 | 0  | 0           |
| TRBV19   | TRBJ2-3 | 58 | 0.000387861 | 2  | 0.001092896 |
| TRBV23-1 | TRBJ1-2 | 57 | 0.000381174 | 1  | 0.000546448 |
| TRBV5-4  | TRBJ1-6 | 57 | 0.000381174 | 1  | 0.000546448 |
| TRBV11-1 | TRBJ1-1 | 57 | 0.000381174 | 0  | 0           |
| TRBV6-5  | TRBJ1-4 | 56 | 0.000374487 | 1  | 0.000546448 |
| TRBV15   | TRBJ2-2 | 56 | 0.000374487 | 3  | 0.001639344 |
| TRBV10-1 | TRBJ2-5 | 56 | 0.000374487 | 4  | 0.002185792 |
| TRBV28   | TRBJ2-6 | 55 | 0.000367799 | 0  | 0           |
| TRBV5-4  | TRBJ1-5 | 55 | 0.000367799 | 0  | 0           |
| TRBV27   | TRBJ2-5 | 54 | 0.000361112 | 3  | 0.001639344 |
| TRBV4-1  | TRBJ2-6 | 53 | 0.000354425 | 1  | 0.000546448 |
| TRBV7-8  | TRBJ2-5 | 53 | 0.000354425 | 3  | 0.001639344 |
| TRBV10-2 | TRBJ2-2 | 52 | 0.000347738 | 2  | 0.001092896 |
| TRBV10-3 | TRBJ2-2 | 52 | 0.000347738 | 2  | 0.001092896 |
| TRBV19   | TRBJ1-3 | 52 | 0.000347738 | 14 | 0.007650273 |
| TRBV4-3  | TRBJ1-4 | 52 | 0.000347738 | 0  | 0           |
| TRBV4-3  | TRBJ2-6 | 52 | 0.000347738 | 0  | 0           |
| TRBV6-7  | TRBJ2-7 | 52 | 0.000347738 | 0  | 0           |
| TRBV27   | TRBJ1-4 | 51 | 0.00034105  | 4  | 0.002185792 |
| TRBV5-4  | TRBJ2-5 | 51 | 0.00034105  | 0  | 0           |
| TRBV6-1  | TRBJ2-2 | 50 | 0.000334363 | 1  | 0.000546448 |
| TRBV28   | TRBJ1-4 | 50 | 0.000334363 | 3  | 0.001639344 |

|          |         |    |             |   |             |
|----------|---------|----|-------------|---|-------------|
| TRBV13   | TRBJ2-3 | 49 | 0.000327676 | 1 | 0.000546448 |
| TRBV5-3  | TRBJ2-7 | 49 | 0.000327676 | 1 | 0.000546448 |
| TRBV30   | TRBJ2-5 | 49 | 0.000327676 | 2 | 0.001092896 |
| TRBV7-8  | TRBJ2-3 | 49 | 0.000327676 | 2 | 0.001092896 |
| TRBV13   | TRBJ2-1 | 49 | 0.000327676 | 3 | 0.001639344 |
| TRBV5-1  | TRBJ2-2 | 49 | 0.000327676 | 4 | 0.002185792 |
| TRBV18   | TRBJ2-6 | 48 | 0.000320989 | 2 | 0.001092896 |
| TRBV7-8  | TRBJ1-4 | 48 | 0.000320989 | 0 | 0           |
| TRBV12-5 | TRBJ2-3 | 47 | 0.000314301 | 1 | 0.000546448 |
| TRBV30   | TRBJ1-3 | 47 | 0.000314301 | 4 | 0.002185792 |
| TRBV16   | TRBJ1-2 | 47 | 0.000314301 | 0 | 0           |
| TRBV6-1  | TRBJ2-6 | 44 | 0.00029424  | 0 | 0           |
| TRBV6-8  | TRBJ2-5 | 44 | 0.00029424  | 0 | 0           |
| TRBV24-1 | TRBJ2-5 | 43 | 0.000287552 | 6 | 0.003278689 |
| TRBV25-1 | TRBJ2-5 | 43 | 0.000287552 | 0 | 0           |
| TRBV4-2  | TRBJ1-6 | 43 | 0.000287552 | 0 | 0           |
| TRBV6-4  | TRBJ2-4 | 43 | 0.000287552 | 0 | 0           |
| TRBV5-6  | TRBJ2-2 | 42 | 0.000280865 | 2 | 0.001092896 |
| TRBV23-1 | TRBJ1-1 | 42 | 0.000280865 | 0 | 0           |
| TRBV5-6  | TRBJ2-3 | 42 | 0.000280865 | 0 | 0           |
| TRBV7-3  | TRBJ1-3 | 42 | 0.000280865 | 0 | 0           |
| TRBV10-2 | TRBJ2-7 | 41 | 0.000274178 | 1 | 0.000546448 |
| TRBV14   | TRBJ2-4 | 41 | 0.000274178 | 0 | 0           |
| TRBV19   | TRBJ1-6 | 40 | 0.000267491 | 0 | 0           |
| TRBV3-1  | TRBJ1-6 | 40 | 0.000267491 | 0 | 0           |
| TRBV10-3 | TRBJ2-3 | 39 | 0.000260803 | 1 | 0.000546448 |
| TRBV4-3  | TRBJ2-5 | 39 | 0.000260803 | 0 | 0           |
| TRBV11-1 | TRBJ1-2 | 38 | 0.000254116 | 0 | 0           |
| TRBV16   | TRBJ1-1 | 38 | 0.000254116 | 0 | 0           |
| TRBV6-6  | TRBJ1-6 | 38 | 0.000254116 | 0 | 0           |
| TRBV6-7  | TRBJ2-2 | 37 | 0.000247429 | 3 | 0.001639344 |
| TRBV6-6  | TRBJ1-3 | 37 | 0.000247429 | 0 | 0           |
| TRBV19   | TRBJ2-6 | 36 | 0.000240741 | 2 | 0.001092896 |
| TRBV27   | TRBJ1-6 | 35 | 0.000234054 | 0 | 0           |
| TRBV5-3  | TRBJ1-2 | 34 | 0.000227367 | 0 | 0           |
| TRBV6-1  | TRBJ1-3 | 34 | 0.000227367 | 0 | 0           |
| TRBV7-6  | TRBJ2-3 | 34 | 0.000227367 | 0 | 0           |
| TRBV5-1  | TRBJ2-6 | 33 | 0.00022068  | 1 | 0.000546448 |
| TRBV24-1 | TRBJ2-3 | 33 | 0.00022068  | 7 | 0.003825137 |
| TRBV7-2  | TRBJ2-6 | 33 | 0.00022068  | 0 | 0           |
| TRBV23-1 | TRBJ2-5 | 32 | 0.000213992 | 1 | 0.000546448 |
| TRBV30   | TRBJ2-2 | 32 | 0.000213992 | 4 | 0.002185792 |
| TRBV6-6  | TRBJ2-5 | 31 | 0.000207305 | 0 | 0           |

|          |         |    |             |   |             |
|----------|---------|----|-------------|---|-------------|
| TRBV30   | TRBJ2-3 | 30 | 0.000200618 | 2 | 0.001092896 |
| TRBV12-5 | TRBJ1-6 | 30 | 0.000200618 | 0 | 0           |
| TRBV29-1 | TRBJ2-6 | 30 | 0.000200618 | 0 | 0           |
| TRBV30   | TRBJ1-4 | 29 | 0.000193931 | 1 | 0.000546448 |
| TRBV10-1 | TRBJ2-2 | 29 | 0.000193931 | 0 | 0           |
| TRBV11-1 | TRBJ2-5 | 29 | 0.000193931 | 0 | 0           |
| TRBV29-1 | TRBJ1-3 | 29 | 0.000193931 | 0 | 0           |
| TRBV5-4  | TRBJ1-3 | 29 | 0.000193931 | 0 | 0           |
| TRBV6-6  | TRBJ2-6 | 29 | 0.000193931 | 0 | 0           |
| TRBV10-3 | TRBJ1-3 | 28 | 0.000187243 | 2 | 0.001092896 |
| TRBV11-1 | TRBJ2-2 | 28 | 0.000187243 | 0 | 0           |
| TRBV25-1 | TRBJ1-4 | 28 | 0.000187243 | 0 | 0           |
| TRBV6-9  | TRBJ2-7 | 28 | 0.000187243 | 0 | 0           |
| TRBV29-1 | TRBJ2-4 | 27 | 0.000180556 | 2 | 0.001092896 |
| TRBV23-1 | TRBJ2-1 | 27 | 0.000180556 | 0 | 0           |
| TRBV25-1 | TRBJ1-3 | 27 | 0.000180556 | 0 | 0           |
| TRBV13   | TRBJ2-6 | 26 | 0.000173869 | 1 | 0.000546448 |
| TRBV11-2 | TRBJ1-3 | 26 | 0.000173869 | 0 | 0           |
| TRBV24-1 | TRBJ1-4 | 26 | 0.000173869 | 0 | 0           |
| TRBV10-2 | TRBJ2-1 | 25 | 0.000167182 | 0 | 0           |
| TRBV10-3 | TRBJ1-6 | 25 | 0.000167182 | 0 | 0           |
| TRBV11-3 | TRBJ1-5 | 25 | 0.000167182 | 0 | 0           |
| TRBV11-3 | TRBJ2-4 | 25 | 0.000167182 | 0 | 0           |
| TRBV15   | TRBJ2-6 | 25 | 0.000167182 | 0 | 0           |
| TRBV6-9  | TRBJ1-1 | 24 | 0.000160494 | 0 | 0           |
| TRBV5-1  | TRBJ1-6 | 23 | 0.000153807 | 2 | 0.001092896 |
| TRBV6-6  | TRBJ1-4 | 23 | 0.000153807 | 2 | 0.001092896 |
| TRBV11-3 | TRBJ1-3 | 23 | 0.000153807 | 0 | 0           |
| TRBV23-1 | TRBJ1-3 | 23 | 0.000153807 | 0 | 0           |
| TRBV25-1 | TRBJ2-6 | 23 | 0.000153807 | 0 | 0           |
| TRBV10-1 | TRBJ1-3 | 22 | 0.00014712  | 2 | 0.001092896 |
| TRBV13   | TRBJ1-6 | 22 | 0.00014712  | 0 | 0           |
| TRBV7-4  | TRBJ2-1 | 22 | 0.00014712  | 0 | 0           |
| TRBV7-6  | TRBJ2-7 | 21 | 0.000140433 | 1 | 0.000546448 |
| TRBV10-1 | TRBJ1-5 | 21 | 0.000140433 | 2 | 0.001092896 |
| TRBV28   | TRBJ1-6 | 21 | 0.000140433 | 3 | 0.001639344 |
| TRBV7-4  | TRBJ2-2 | 21 | 0.000140433 | 0 | 0           |
| TRBV10-2 | TRBJ2-3 | 20 | 0.000133745 | 0 | 0           |
| TRBV11-3 | TRBJ2-6 | 20 | 0.000133745 | 0 | 0           |
| TRBV27   | TRBJ2-4 | 20 | 0.000133745 | 0 | 0           |
| TRBV5-6  | TRBJ1-3 | 20 | 0.000133745 | 0 | 0           |
| TRBV6-7  | TRBJ1-1 | 20 | 0.000133745 | 0 | 0           |
| TRBV6-1  | TRBJ1-6 | 19 | 0.000127058 | 0 | 0           |

|          |         |    |             |   |             |
|----------|---------|----|-------------|---|-------------|
| TRBV7-9  | TRBJ2-6 | 18 | 0.000120371 | 2 | 0.001092896 |
| TRBV24-1 | TRBJ2-6 | 18 | 0.000120371 | 3 | 0.001639344 |
| TRBV5-4  | TRBJ2-2 | 18 | 0.000120371 | 0 | 0           |
| TRBV6-5  | TRBJ2-4 | 18 | 0.000120371 | 0 | 0           |
| TRBV6-9  | TRBJ2-5 | 18 | 0.000120371 | 0 | 0           |
| TRBV7-6  | TRBJ2-1 | 18 | 0.000120371 | 0 | 0           |
| TRBV2    | TRBJ2-4 | 17 | 0.000113683 | 2 | 0.001092896 |
| TRBV27   | TRBJ2-6 | 17 | 0.000113683 | 0 | 0           |
| TRBV7-9  | TRBJ2-4 | 17 | 0.000113683 | 0 | 0           |
| TRBV12-5 | TRBJ2-4 | 16 | 0.000106996 | 1 | 0.000546448 |
| TRBV24-1 | TRBJ1-6 | 16 | 0.000106996 | 1 | 0.000546448 |
| TRBV4-1  | TRBJ2-4 | 16 | 0.000106996 | 0 | 0           |
| TRBV13   | TRBJ2-2 | 15 | 0.000100309 | 1 | 0.000546448 |
| TRBV6-8  | TRBJ1-4 | 15 | 0.000100309 | 1 | 0.000546448 |
| TRBV10-2 | TRBJ1-2 | 15 | 0.000100309 | 2 | 0.001092896 |
| TRBV11-1 | TRBJ2-3 | 15 | 0.000100309 | 0 | 0           |
| TRBV23-1 | TRBJ1-4 | 15 | 0.000100309 | 0 | 0           |
| TRBV6-9  | TRBJ1-3 | 15 | 0.000100309 | 0 | 0           |
| TRBV7-6  | TRBJ1-2 | 15 | 0.000100309 | 0 | 0           |
| TRBV13   | TRBJ1-3 | 14 | 9.36217E-05 | 1 | 0.000546448 |
| TRBV11-1 | TRBJ1-6 | 14 | 9.36217E-05 | 0 | 0           |
| TRBV5-1  | TRBJ2-4 | 14 | 9.36217E-05 | 0 | 0           |
| TRBV5-4  | TRBJ2-6 | 14 | 9.36217E-05 | 0 | 0           |
| TRBV5-8  | TRBJ2-6 | 14 | 9.36217E-05 | 0 | 0           |
| TRBV7-6  | TRBJ2-2 | 14 | 9.36217E-05 | 0 | 0           |
| TRBV9    | TRBJ2-4 | 13 | 8.69344E-05 | 2 | 0.001092896 |
| TRBV10-1 | TRBJ2-3 | 13 | 8.69344E-05 | 4 | 0.002185792 |
| TRBV27   | TRBJ1-3 | 13 | 8.69344E-05 | 0 | 0           |
| TRBV6-9  | TRBJ2-2 | 13 | 8.69344E-05 | 0 | 0           |
| TRBV24-1 | TRBJ1-3 | 12 | 8.02472E-05 | 1 | 0.000546448 |
| TRBV5-4  | TRBJ2-4 | 12 | 8.02472E-05 | 1 | 0.000546448 |
| TRBV7-6  | TRBJ1-3 | 12 | 8.02472E-05 | 1 | 0.000546448 |
| TRBV11-2 | TRBJ2-6 | 12 | 8.02472E-05 | 0 | 0           |
| TRBV13   | TRBJ2-4 | 12 | 8.02472E-05 | 0 | 0           |
| TRBV16   | TRBJ1-5 | 12 | 8.02472E-05 | 0 | 0           |
| TRBV7-2  | TRBJ1-3 | 12 | 8.02472E-05 | 0 | 0           |
| TRBV7-2  | TRBJ2-4 | 12 | 8.02472E-05 | 0 | 0           |
| TRBV7-7  | TRBJ2-5 | 12 | 8.02472E-05 | 0 | 0           |
| TRBV12-5 | TRBJ1-3 | 11 | 7.35599E-05 | 0 | 0           |
| TRBV10-1 | TRBJ1-6 | 10 | 6.68726E-05 | 1 | 0.000546448 |
| TRBV14   | TRBJ1-5 | 10 | 6.68726E-05 | 1 | 0.000546448 |
| TRBV7-3  | TRBJ1-4 | 10 | 6.68726E-05 | 2 | 0.001092896 |
| TRBV10-2 | TRBJ1-6 | 10 | 6.68726E-05 | 0 | 0           |

|          |         |   |             |   |             |
|----------|---------|---|-------------|---|-------------|
| TRBV10-3 | TRBJ1-4 | 9 | 6.01854E-05 | 2 | 0.001092896 |
| TRBV10-3 | TRBJ2-6 | 9 | 6.01854E-05 | 0 | 0           |
| TRBV19   | TRBJ2-4 | 9 | 6.01854E-05 | 0 | 0           |
| TRBV4-2  | TRBJ2-4 | 9 | 6.01854E-05 | 0 | 0           |
| TRBV5-5  | TRBJ2-3 | 9 | 6.01854E-05 | 0 | 0           |
| TRBV6-9  | TRBJ1-6 | 9 | 6.01854E-05 | 0 | 0           |
| TRBV28   | TRBJ2-4 | 8 | 5.34981E-05 | 1 | 0.000546448 |
| TRBV4-2  | TRBJ2-6 | 8 | 5.34981E-05 | 0 | 0           |
| TRBV5-5  | TRBJ1-1 | 8 | 5.34981E-05 | 0 | 0           |
| TRBV5-5  | TRBJ2-2 | 8 | 5.34981E-05 | 0 | 0           |
| TRBV5-6  | TRBJ2-6 | 8 | 5.34981E-05 | 0 | 0           |
| TRBV6-9  | TRBJ2-3 | 8 | 5.34981E-05 | 0 | 0           |
| TRBV30   | TRBJ2-4 | 7 | 4.68108E-05 | 2 | 0.001092896 |
| TRBV10-2 | TRBJ2-5 | 7 | 4.68108E-05 | 0 | 0           |
| TRBV18   | TRBJ2-4 | 7 | 4.68108E-05 | 0 | 0           |
| TRBV24-1 | TRBJ2-4 | 7 | 4.68108E-05 | 0 | 0           |
| TRBV7-6  | TRBJ1-4 | 7 | 4.68108E-05 | 0 | 0           |
| TRBV5-6  | TRBJ1-4 | 6 | 4.01236E-05 | 0 | 0           |
| TRBV7-8  | TRBJ2-4 | 5 | 3.34363E-05 | 1 | 0.000546448 |
| TRBV10-1 | TRBJ1-4 | 5 | 3.34363E-05 | 0 | 0           |
| TRBV5-3  | TRBJ1-5 | 5 | 3.34363E-05 | 0 | 0           |
| TRBV6-1  | TRBJ2-4 | 5 | 3.34363E-05 | 0 | 0           |
| TRBV6-7  | TRBJ2-3 | 5 | 3.34363E-05 | 0 | 0           |
| TRBV7-4  | TRBJ1-1 | 5 | 3.34363E-05 | 0 | 0           |
| TRBV23-1 | TRBJ2-4 | 4 | 2.67491E-05 | 1 | 0.000546448 |
| TRBV30   | TRBJ1-6 | 4 | 2.67491E-05 | 3 | 0.001639344 |
| TRBV12-2 | TRBJ2-1 | 4 | 2.67491E-05 | 0 | 0           |
| TRBV5-3  | TRBJ2-4 | 4 | 2.67491E-05 | 0 | 0           |
| TRBV5-6  | TRBJ1-6 | 4 | 2.67491E-05 | 0 | 0           |
| TRBV6-3  | TRBJ2-1 | 4 | 2.67491E-05 | 0 | 0           |
| TRBV16   | TRBJ2-7 | 3 | 2.00618E-05 | 0 | 0           |
| TRBV3-2  | TRBJ1-4 | 3 | 2.00618E-05 | 0 | 0           |
| TRBV3-2  | TRBJ2-5 | 3 | 2.00618E-05 | 0 | 0           |
| TRBV5-3  | TRBJ2-1 | 3 | 2.00618E-05 | 0 | 0           |
| TRBV6-3  | TRBJ2-5 | 3 | 2.00618E-05 | 0 | 0           |
| TRBV6-9  | TRBJ1-2 | 3 | 2.00618E-05 | 0 | 0           |
| TRBV8-2  | TRBJ1-2 | 3 | 2.00618E-05 | 0 | 0           |
| TRBV8-2  | TRBJ2-3 | 3 | 2.00618E-05 | 0 | 0           |
| TRBV11-2 | TRBJ2-4 | 2 | 1.33745E-05 | 1 | 0.000546448 |
| TRBV15   | TRBJ1-3 | 2 | 1.33745E-05 | 2 | 0.001092896 |
| TRBV11-3 | TRBJ1-6 | 2 | 1.33745E-05 | 0 | 0           |
| TRBV12-2 | TRBJ1-2 | 2 | 1.33745E-05 | 0 | 0           |
| TRBV14   | TRBJ1-6 | 2 | 1.33745E-05 | 0 | 0           |

|          |         |   |             |   |             |
|----------|---------|---|-------------|---|-------------|
| TRBV23-1 | TRBJ2-2 | 2 | 1.33745E-05 | 0 | 0           |
| TRBV23-1 | TRBJ2-3 | 2 | 1.33745E-05 | 0 | 0           |
| TRBV3-2  | TRBJ2-7 | 2 | 1.33745E-05 | 0 | 0           |
| TRBV5-3  | TRBJ2-5 | 2 | 1.33745E-05 | 0 | 0           |
| TRBV6-7  | TRBJ1-2 | 2 | 1.33745E-05 | 0 | 0           |
| TRBV6-7  | TRBJ1-5 | 2 | 1.33745E-05 | 0 | 0           |
| TRBV6-7  | TRBJ2-5 | 2 | 1.33745E-05 | 0 | 0           |
| TRBV7-5  | TRBJ2-2 | 2 | 1.33745E-05 | 0 | 0           |
| TRBV8-2  | TRBJ1-3 | 2 | 1.33745E-05 | 0 | 0           |
| TRBV10-2 | TRBJ1-5 | 1 | 6.68726E-06 | 1 | 0.000546448 |
| TRBV10-3 | TRBJ2-4 | 1 | 6.68726E-06 | 1 | 0.000546448 |
| TRBV5-3  | TRBJ2-3 | 1 | 6.68726E-06 | 1 | 0.000546448 |
| TRBV12-1 | TRBJ2-2 | 1 | 6.68726E-06 | 2 | 0.001092896 |
| TRBV12-5 | TRBJ2-6 | 1 | 6.68726E-06 | 2 | 0.001092896 |
| TRBV11-1 | TRBJ1-3 | 1 | 6.68726E-06 | 0 | 0           |
| TRBV11-3 | TRBJ1-2 | 1 | 6.68726E-06 | 0 | 0           |
| TRBV12-4 | TRBJ1-2 | 1 | 6.68726E-06 | 0 | 0           |
| TRBV16   | TRBJ2-1 | 1 | 6.68726E-06 | 0 | 0           |
| TRBV22-1 | TRBJ1-3 | 1 | 6.68726E-06 | 0 | 0           |
| TRBV26   | TRBJ1-1 | 1 | 6.68726E-06 | 0 | 0           |
| TRBV29-1 | TRBJ1-6 | 1 | 6.68726E-06 | 0 | 0           |
| TRBV3-2  | TRBJ1-1 | 1 | 6.68726E-06 | 0 | 0           |
| TRBV30   | TRBJ2-6 | 1 | 6.68726E-06 | 0 | 0           |
| TRBV5-3  | TRBJ1-1 | 1 | 6.68726E-06 | 0 | 0           |
| TRBV5-8  | TRBJ1-6 | 1 | 6.68726E-06 | 0 | 0           |
| TRBV6-3  | TRBJ1-2 | 1 | 6.68726E-06 | 0 | 0           |
| TRBV6-3  | TRBJ1-5 | 1 | 6.68726E-06 | 0 | 0           |
| TRBV6-3  | TRBJ2-2 | 1 | 6.68726E-06 | 0 | 0           |
| TRBV6-8  | TRBJ1-5 | 1 | 6.68726E-06 | 0 | 0           |
| TRBV6-9  | TRBJ2-1 | 1 | 6.68726E-06 | 0 | 0           |
| TRBV7-3  | TRBJ2-4 | 1 | 6.68726E-06 | 0 | 0           |
| TRBV7-4  | TRBJ1-4 | 1 | 6.68726E-06 | 0 | 0           |
| TRBV7-4  | TRBJ1-5 | 1 | 6.68726E-06 | 0 | 0           |
| TRBV7-7  | TRBJ1-1 | 1 | 6.68726E-06 | 0 | 0           |
| TRBV7-7  | TRBJ2-3 | 1 | 6.68726E-06 | 0 | 0           |
| TRBV8-2  | TRBJ1-5 | 1 | 6.68726E-06 | 0 | 0           |
| TRBV8-2  | TRBJ2-1 | 1 | 6.68726E-06 | 0 | 0           |
| TRBV8-2  | TRBJ2-2 | 1 | 6.68726E-06 | 0 | 0           |
| TRBV8-2  | TRBJ2-7 | 1 | 6.68726E-06 | 0 | 0           |
| TRBV21-1 | TRBJ2-7 | 0 | 0           | 6 | 0.003278689 |
| TRBV21-1 | TRBJ1-1 | 0 | 0           | 5 | 0.00273224  |
| TRBV22-1 | TRBJ2-7 | 0 | 0           | 4 | 0.002185792 |
| TRBV21-1 | TRBJ1-5 | 0 | 0           | 3 | 0.001639344 |

|          |         |   |   |   |             |
|----------|---------|---|---|---|-------------|
| TRBV21-1 | TRBJ2-3 | 0 | 0 | 3 | 0.001639344 |
| TRBV3-1  | TRBJ2-2 | 0 | 0 | 3 | 0.001639344 |
| TRBV3-2  | TRBJ1-3 | 0 | 0 | 3 | 0.001639344 |
| TRBV21-1 | TRBJ1-2 | 0 | 0 | 2 | 0.001092896 |
| TRBV21-1 | TRBJ1-3 | 0 | 0 | 2 | 0.001092896 |
| TRBV21-1 | TRBJ2-2 | 0 | 0 | 2 | 0.001092896 |
| TRBV21-1 | TRBJ2-5 | 0 | 0 | 2 | 0.001092896 |
| TRBV1    | TRBJ2-1 | 0 | 0 | 1 | 0.000546448 |
| TRBV16   | TRBJ1-6 | 0 | 0 | 1 | 0.000546448 |
| TRBV3-2  | TRBJ1-5 | 0 | 0 | 1 | 0.000546448 |
| TRBV6-7  | TRBJ2-1 | 0 | 0 | 1 | 0.000546448 |
| TRBV8-2  | TRBJ1-4 | 0 | 0 | 1 | 0.000546448 |

Table 10: Cell Line Identified VJ Rearrangements

| Cell Line                                      | Internal  | Reference Collection # | Alpha                     | Beta                                       | Gamma                 | Delta |
|------------------------------------------------|-----------|------------------------|---------------------------|--------------------------------------------|-----------------------|-------|
| Previously Documented/Known TCR Configurations |           |                        |                           |                                            |                       |       |
| CEM                                            | SE14-2035 | ATCC CCL-119           | NA                        | TRBV3-1*01 - TRBD1*01 - TRBJ2-3*01         | TRGV3 - TRGJ1/TRGJ2   | NA    |
|                                                |           |                        |                           | TRBJ1-5 - TRBJ2-1 (partial rearrangement)  | TRGV4 - TRGJ1/TRGJ2   |       |
|                                                |           |                        |                           | TRBV9 - TRBD2 (partial rearrangement)      |                       |       |
| Observed                                       |           |                        |                           |                                            |                       |       |
|                                                |           |                        | Alpha (Counts)            | Beta (Counts)                              | Gamma (Counts)        | Delta |
|                                                |           |                        | TRAV27#1TRAJ40#1 (987)    | TRBV3-1#1TRBJ2-3#1 (1087)                  | TRGV4#2TRGJ2#1 (809)  | ND    |
|                                                |           |                        | TRAV29_DV5#1TRAJ4#1 (765) | TRBV3-2#3TRBJ2-3#1 (512)                   | TRGV3#2TRGJ2#1 (604)  |       |
|                                                |           |                        | TRAV29_DV5#3TRAJ4#1 (45)  | TRBV3-2#3TRBJ2-4#1 (45)                    | TRGV3#1TRGJ2#1 (228)  |       |
|                                                |           |                        | TRAV27#3TRAJ40#1 (3)      | TRBV3-1#1TRBJ2-5#1 (8)                     | TRGV5#1TRGJ2#1 (106)  |       |
|                                                |           |                        | TRAV27#2TRAJ40#1 (1)      | TRBV3-1#1TRBJ2-4#1 (4)                     | TRGV4#1TRGJ2#1 (1)    |       |
|                                                |           |                        | TRAV8-6#2TRAJ20#1 (1)     | TRBV3-1#1TRBJ2-6#1 (2)                     |                       |       |
|                                                |           |                        |                           | TRBV3-2#3TRBJ2-6#1 (2)                     |                       |       |
|                                                |           |                        |                           | TRBV9#2TRBJ2-1#1 (1)                       |                       |       |
| Previously Documented/Known TCR Configurations |           |                        |                           |                                            |                       |       |
| Jurkat                                         | SE14-2033 | DSMZ ACC-282           | TRAV8-4 - TRAJ3           | TRBV12-3 - TRBJ1-2 (partial rearrangement) | TRGV8-TRGJ1/TRGJ2     | NA    |
|                                                |           |                        |                           |                                            | TRGV11-TRGJ1/TRGJ2    |       |
| Observed                                       |           |                        |                           |                                            |                       |       |
|                                                |           |                        | TRAV8-4#6TRAJ3#1 (1000)   | TRBV12-4#1TRBJ1-2#1 (608)                  | TRGV8#1TRGJ2#1 (545)  | ND    |
|                                                |           |                        | TRAV8-4#2TRAJ3#1 (118)    | TRBV12-4#2TRBJ1-2#1 (137)                  | TRGV11#1TRGJ1#1 (272) |       |
|                                                |           |                        | TRAV12-3#2TRAJ26#1 (16)   | TRBV12-3#1TRBJ1-2#1 (16)                   | TRGV11#2TRGJ1#1 (202) |       |
|                                                |           |                        | TRAV17#1TRAJ24#2 (7)      |                                            | TRGV11#1TRGJ2#1 (12)  |       |
|                                                |           |                        | TRAV17#1TRAJ16#1 (4)      |                                            | TRGV11#2TRGJ2#1 (1)   |       |
|                                                |           |                        | TRAV17#1TRAJ29#1 (3)      |                                            |                       |       |
|                                                |           |                        | TRAV14_DV4#2TRAJ24#2 (2)  |                                            |                       |       |
|                                                |           |                        | TRAV16#1TRAJ29#1 (1)      |                                            |                       |       |
|                                                |           |                        | TRAV17#1TRAJ32#1 (1)      |                                            |                       |       |
|                                                |           |                        | TRAV29_DV5#1TRAJ4#1 (1)   |                                            |                       |       |
|                                                |           |                        | TRAV9-2#1TRAJ29#1 (1)     |                                            |                       |       |
| Previously Documented/Known TCR Configurations |           |                        |                           |                                            |                       |       |
| MOLT4                                          | SE14-2034 | ATCC CRL-1582          | NA                        | TRBV20-1*01 - TRBD2*01 - TRBJ2-1*01        | TRGV2 - TRGJP1        | NA    |
|                                                |           |                        |                           | TRBV10-3 - TRBD1*01 - TRBJ2-5              | TRGV2 - TRGJP2        |       |
| Observed                                       |           |                        |                           |                                            |                       |       |
|                                                |           |                        | TRAV1-1#1TRAJ33#1 (799)   | TRBV20-1#1TRBJ2-1#1 (937)                  | TRGV2#1TRGJP2#1 (524) | ND    |
|                                                |           |                        | TRAV1-1#1TRAJ24#2 (621)   | TRBV10-3#2TRBJ2-5#1 (724)                  | TRGV2#2TRGJP1#1 (496) |       |
|                                                |           |                        | TRAV1-1#2TRAJ24#2 (79)    | TRBV20_OR9-2#3TRBJ2-1#1 (384)              | TRGV8#1TRGJP1#1 (1)   |       |
|                                                |           |                        | TRAV1-1#2TRAJ33#1 (1)     | TRBV10-3#2TRBJ2-6#1 (91)                   |                       |       |

|                                                |           |               |                          |                                  |                       |    |
|------------------------------------------------|-----------|---------------|--------------------------|----------------------------------|-----------------------|----|
|                                                |           |               |                          | TRBV20-1#7TRBJ2-1#1 (3)          |                       |    |
|                                                |           |               |                          | TRBV20_OR9-2#3TRBJ2-2#1 (2)      |                       |    |
|                                                |           |               |                          | TRBV20-1#1TRBJ2-2#1 (1)          |                       |    |
|                                                |           |               |                          | TRBV20-1#3TRBJ2-1#1 (1)          |                       |    |
| Previously Documented/Known TCR Configurations |           |               |                          |                                  |                       |    |
| SUPT1                                          | SE14-2005 | ATCC CRL-1942 | NA                       | TRBV9*01 - TRBD2*01 - TRVJ2-1*01 | TRGV3 - TRGJ1/TRGJ2   | NA |
|                                                |           |               |                          |                                  | TRGV4 - TRGJ1/TRGJ2   |    |
| Observed                                       |           |               |                          |                                  |                       |    |
|                                                |           |               | TRAV1-1#1TRAJ12#1 (1110) | TRBV9#2TRBJ2-1#1 (971)           | TRGV3#2TRGJ2#1 (683)  | ND |
|                                                |           |               | TRAV1-1#2TRAJ8#1 (836)   | TRBV9#1TRBJ2-1#1 (137)           | TRGV4#1TRGJ2#1 (449)  |    |
|                                                |           |               | TRAV1-1#1TRAJ8#1 (263)   | TRBV9#2TRBJ2-2#1 (9)             | TRGV4#2TRGJ2#1 (367)  |    |
|                                                |           |               | TRAV1-1#2TRAJ12#1 (4)    | TRBV5-3#1TRBJ2-5#1 (8)           | TRGV3#1TRGJ2#1 (198)  |    |
|                                                |           |               | TRAV29_DV5#1TRAJ26#1 (3) | TRBV5-3#2TRBJ2-5#1 (4)           | TRGV5P#2TRGJ2#1 (156) |    |
|                                                |           |               | TRAV8-4#6TRAJ3#1 (1)     | TRBV7-2#4TRBJ2-7#1 (4)           |                       |    |
|                                                |           |               |                          | TRBV5-3#1TRBJ2-3#1 (2)           |                       |    |
|                                                |           |               |                          | TRBV9#2TRBJ2-2P#1 (2)            |                       |    |
|                                                |           |               |                          | TRBV6-3#1TRBJ2-5#1 (1)           |                       |    |
|                                                |           |               |                          | TRBV7-2#4TRBJ2-2#1 (1)           |                       |    |

Table cell colors (green: alpha, blue/purple: beta, red/orange: gamma) correspond to previously reported unique VJ TCR configurations compiled at the following IMGT location:  
[http://www.imgt.org/IMGTrepertoire/Probes/Rearrangements%20and%20junctions/human/Hu\\_TRrea.html](http://www.imgt.org/IMGTrepertoire/Probes/Rearrangements%20and%20junctions/human/Hu_TRrea.html)

Table 11.1: Sample summary with beta VJ clonality scores

| sample                 | clonality.sco<br>re.beta | BIOMED<br>.beta | capTCRse<br>q.beta | VJ.count<br>s.beta | max.v.beta                                     | max.j.<br>beta | max.clone.pr<br>op.beta |
|------------------------|--------------------------|-----------------|--------------------|--------------------|------------------------------------------------|----------------|-------------------------|
| A037                   | 0.00                     | NA              | NA                 | 613                | TRBV20-1                                       | TRBJ2-1        | 0.01                    |
| L2D8                   | 0.98                     | NA              | NA                 | 1178               | TRBV7-8                                        | TRBJ1-6        | 0.98                    |
| M36-EZM                | 0.02                     | NA              | NA                 | 122                | TRBV5-4, TRBV5-5, TRBV5-6,<br>TRBV5-7, TRBV5-8 | TRBJ2-2P       | 0.07                    |
| M36-TIL2-1E7P3         | 0.02                     | NA              | NA                 | 1761               | TRBV2                                          | TRBJ2-1        | 0.08                    |
| OV7-TIL2               | 0.11                     | NA              | NA                 | 2176               | TRBV7-8                                        | TRBJ2-5        | 0.31                    |
| CEM                    | 0.96                     | NA              | NA                 | 1635               | TRBV9                                          | TRBJ2-1        | 0.97                    |
| Jurkat                 | 0.97                     | NA              | NA                 | 1099               | TRBV12-3, TRBV12-4                             | TRBJ1-2        | 0.98                    |
| MOLT4                  | 0.30                     | NA              | NA                 | 3147               | TRBV20-1                                       | TRBJ2-1        | 0.63                    |
| SUPT1                  | 0.99                     | NA              | NA                 | 2143               | TRBV3-1                                        | TRBJ2-3        | 0.99                    |
| STIM1-CY3              | 0.10                     | NA              | NA                 | 1764               | TRBV9                                          | TRBJ2-3        | 0.28                    |
| A037_CD3_1S            | 0.00                     | NA              | NA                 | 3665               | TRBV25-1                                       | TRBJ2-1        | 0.01                    |
| A037_PBMC_1S           | 0.01                     | NA              | NA                 | 592                | TRBV6-2, TRBV6-3                               | TRBJ2-5        | 0.02                    |
| A037_PBMC_TCR_A        | 0.02                     | NA              | NA                 | 100                | TRBV5-4, TRBV5-8                               | TRBJ1-6        | 0.11                    |
| A037_PBMC_TCR_B        | 0.02                     | NA              | NA                 | 828                | TRBV20-1                                       | TRBJ2-3        | 0.05                    |
| A037_PBMC_TCR_D        | 0.02                     | NA              | NA                 | 208                | TRBV20-1                                       | TRBJ1-6        | 0.04                    |
| A037_PBMC_TCR_E        | 0.00                     | NA              | NA                 | 2049               | TRBV6-2, TRBV6-3                               | TRBJ2-5        | 0.01                    |
| A037_PBMC_TCR_F        | 0.00                     | NA              | NA                 | 1637               | TRBV24-1                                       | TRBJ1-6        | 0.02                    |
| A037_PBMC_TCR_G        | 0.02                     | NA              | NA                 | 198                | TRBV6-1                                        | TRBJ2-1        | 0.12                    |
| A037_PBMC_TCR_H        | 0.01                     | NA              | NA                 | 1107               | TRBV6-2, TRBV6-3                               | TRBJ2-5        | 0.03                    |
| A037_PBMC_TCR_J        | 0.04                     | NA              | NA                 | 152                | TRBV10-2                                       | TRBJ2-7        | 0.06                    |
| A037_PBMC_TCR_K        | 0.01                     | NA              | NA                 | 171                | TRBV5-4, TRBV5-5, TRBV5-7,<br>TRBV5-8          | TRBJ2-2P       | 0.02                    |
| A037_PBMC_TCR_L        | 0.01                     | NA              | NA                 | 111                | TRBV6-2, TRBV6-3                               | TRBJ2-5        | 0.03                    |
| 16_01_A037_PBMC_TCR_F  | 0.01                     | NA              | NA                 | 331                | TRBV7-6, TRBV7-7                               | TRBJ1-6        | 0.04                    |
| 16_01_A037_PBMC_TCR_H  | 0.00                     | NA              | NA                 | 720                | TRBV6-1                                        | TRBJ2-4        | 0.02                    |
| 16_11_A037_PBMC_TCR_VJ | 0.04                     | NA              | NA                 | 136                | TRBV7-6, TRBV7-7, TRBV3-2,<br>TRBV5-6          | TRBJ1-3        | 0.08                    |
| A037_PBMC_TCR-JV       | 0.01                     | NA              | NA                 | 1830               | TRBV6-2, TRBV6-3                               | TRBJ2-5        | 0.02                    |
| H128_PBMC_TCR-JV       | 0.07                     | NA              | NA                 | 5134               | TRBV11-3                                       | TRBJ2-3        | 0.10                    |
| H129_PBMC_TCR-JV       | 0.02                     | NA              | NA                 | 2851               | TRBV19                                         | TRBJ1-3        | 0.03                    |
| H130_PBMC_TCR-JV       | 0.02                     | NA              | NA                 | 3908               | TRBV6-1                                        | TRBJ1-2        | 0.07                    |
| H131_PBMC_TCR-JV       | 0.01                     | NA              | NA                 | 2356               | TRBV27                                         | TRBJ1-3        | 0.02                    |

|                   |      |        |        |        |                              |         |      |
|-------------------|------|--------|--------|--------|------------------------------|---------|------|
| H132_PBMC_TCR-JV  | 0.00 | NA     | NA     | 3808   | TRBV7-3                      | TRBJ2-7 | 0.02 |
| H133_PBMC_TCR-JV  | 0.01 | NA     | NA     | 5440   | TRBV19                       | TRBJ1-3 | 0.01 |
| invivoscribe_neg  | 0.00 | NA     | NA     | 110717 | TRBV14                       | TRBJ1-1 | 0.00 |
| invivoscribe_pos  | 0.21 | NA     | NA     | 201085 | TRBV12-4, TRBV12-3           | TRBJ1-2 | 0.22 |
| invivoscribe_A037 | 0.01 | NA     | NA     | 149538 | TRBV3-1, TRBV3-2             | TRBJ2-1 | 0.01 |
| invivoscribe_H128 | 0.01 | NA     | NA     | 555110 | TRBV6-1                      | TRBJ1-1 | 0.04 |
| invivoscribe_H129 | 0.00 | NA     | NA     | 113651 | TRBV19                       | TRBJ1-3 | 0.01 |
| invivoscribe_H130 | 0.05 | NA     | NA     | 171257 | TRBV6-1                      | TRBJ1-2 | 0.06 |
| invivoscribe_H131 | 0.00 | NA     | NA     | 172397 | TRBV14                       | TRBJ1-1 | 0.01 |
| invivoscribe_H132 | 0.00 | NA     | NA     | 470619 | TRBV14                       | TRBJ2-1 | 0.01 |
| invivoscribe_H133 | 0.00 | NA     | NA     | 323157 | TRBV2                        | TRBJ1-1 | 0.01 |
| TCL-063           | 0.14 | Clonal | clonal | 151    | TRBV5-1                      | TRBJ2-5 | 0.19 |
| TCL-019           | 0.27 | Clonal | clonal | 3092   | TRBV13                       | TRBJ2-2 | 0.33 |
| TCL-034           | 0.36 | Clonal | clonal | 1784   | TRBV25-1                     | TRBJ2-7 | 0.41 |
| TCL-022           | 0.37 | Clonal | clonal | 1090   | TRBV7-9                      | TRBJ2-5 | 0.42 |
| TCL-020           | 0.43 | Clonal | clonal | 1784   | TRBV12-4, TRBV12-3           | TRBJ2-3 | 0.47 |
| TCL-036           | 0.37 | Clonal | clonal | 4773   | TRBV6-3, TRBV6-2             | TRBJ2-7 | 0.50 |
| TCL-031           | 0.33 | Clonal | clonal | 3      | TRBV6-6                      | TRBJ1-5 | 0.67 |
| TCL-053           | 0.81 | Clonal | clonal | 262    | TRBV20-1                     | TRBJ2-7 | 0.82 |
| TCL-046           | 0.89 | Clonal | clonal | 504    | TRBV6-6                      | TRBJ1-2 | 0.90 |
| TCL-007           | 0.03 | Clonal | clonal | 235    | TRBV7-6                      | TRBJ1-1 | 0.10 |
| TCL-050           | 0.25 | Clonal | clonal | 219    | TRBV6-5                      | TRBJ1-1 | 0.34 |
| TCL-030           | 0.33 | Clonal | clonal | 232    | TRBV6-6                      | TRBJ1-3 | 0.36 |
| TCL-012           | 0.23 | Clonal | clonal | 563    | TRBV30                       | TRBJ2-3 | 0.30 |
| TCL-039           | 0.11 | Clonal | clonal | 114    | TRBV6-2, TRBV6-3             | TRBJ2-7 | 0.21 |
| TCL-035           | 0.00 | Clonal | clonal | 1000   | TRBV20-1                     | TRBJ2-1 | 0.02 |
| TCL-004           | 0.01 | Clonal | clonal | 318    | TRBV4-1                      | TRBJ2-2 | 0.06 |
| TCL-027           | 0.01 | Clonal | clonal | 636    | TRBV19                       | TRBJ2-7 | 0.07 |
| TCL-051           | 0.07 | Clonal | clonal | 100    | TRBV20-1                     | TRBJ2-3 | 0.15 |
| TCL-005           | 0.07 | Clonal | clonal | 165    | TRBV7-3                      | TRBJ2-3 | 0.18 |
| TCL-059           | 0.07 | Clonal | clonal | 952    | TRBV2                        | TRBJ1-2 | 0.11 |
| TCL-042           | 0.06 | Clonal | clonal | 190    | TRBV3-1, TRBV3-2             | TRBJ1-1 | 0.15 |
| TCL-052           | 0.00 | ND     | clonal | 3532   | TRBV11-1, TRBV11-3, TRBV11-2 | TRBJ2-1 | 0.01 |

|         |      |            |            |      |                                             |         |      |
|---------|------|------------|------------|------|---------------------------------------------|---------|------|
| TCL-032 | 0.03 | ND         | clonal     | 298  | TRBV10-1                                    | TRBJ2-1 | 0.08 |
| TCL-037 | 0.00 | ND         | polyclonal | 436  | TRBV7-3                                     | TRBJ2-3 | 0.04 |
| TCL-049 | 0.02 | Clonal     | polyclonal | 755  | TRBV12-3, TRBV12-4                          | TRBJ2-7 | 0.05 |
| TCL-038 | 0.04 | Clonal     | polyclonal | 476  | TRBV2                                       | TRBJ1-1 | 0.07 |
| TCL-041 | 0.15 | Polyclonal | clonal     | 1731 | TRBV7-8                                     | TRBJ1-4 | 0.20 |
| TCL-017 | 0.01 | Polyclonal | polyclonal | 114  | TRBV6-7                                     | TRBJ1-5 | 0.05 |
| TCL-024 | 0.01 | Polyclonal | polyclonal | 572  | TRBV7-3                                     | TRBJ2-3 | 0.05 |
| TCL-010 | 0.05 | Polyclonal | polyclonal | 1281 | TRBV6-5                                     | TRBJ2-1 | 0.10 |
| TCL-057 | 0.00 | Clonal     | polyclonal | 981  | TRBV6-5                                     | TRBJ2-3 | 0.02 |
| TCL-001 | 0.01 | Clonal     | polyclonal | 1288 | TRBV2                                       | TRBJ2-2 | 0.03 |
| TCL-026 | 0.04 | Clonal     | polyclonal | 618  | TRBV7-6, TRBV7-7                            | TRBJ1-3 | 0.07 |
| TCL-045 | 0.01 | Clonal     | polyclonal | 150  | TRBV7-6                                     | TRBJ1-1 | 0.09 |
| TCL-013 | 0.06 | Clonal     | polyclonal | 1047 | TRBV19                                      | TRBJ2-1 | 0.15 |
| TCL-008 | 0.03 | Polyclonal | clonal     | 1021 | TRBV11-2                                    | TRBJ1-4 | 0.06 |
| TCL-021 | 0.00 | Polyclonal | polyclonal | 3165 | TRBV11-2                                    | TRBJ1-1 | 0.01 |
| TCL-033 | 0.00 | Polyclonal | polyclonal | 623  | TRBV28                                      | TRBJ2-2 | 0.01 |
| TCL-009 | 0.00 | Polyclonal | polyclonal | 737  | TRBV7-6, TRBV7-7                            | TRBJ1-3 | 0.01 |
| TCL-015 | 0.00 | Polyclonal | polyclonal | 547  | TRBV6-4, TRBV7-6, TRBV7-7                   | TRBJ1-3 | 0.02 |
| TCL-064 | 0.00 | Polyclonal | polyclonal | 979  | TRBV11-2                                    | TRBJ1-2 | 0.02 |
| TCL-029 | 0.00 | Polyclonal | polyclonal | 728  | TRBV20-1                                    | TRBJ2-3 | 0.02 |
| TCL-018 | 0.00 | Polyclonal | polyclonal | 410  | TRBV29-1                                    | TRBJ2-7 | 0.02 |
| TCL-003 | 0.00 | Polyclonal | polyclonal | 1271 | TRBV6-5                                     | TRBJ1-1 | 0.02 |
| TCL-060 | 0.02 | Polyclonal | polyclonal | 828  | TRBV6-4                                     | TRBJ1-3 | 0.03 |
| TCL-025 | 0.01 | Polyclonal | polyclonal | 252  | TRBV27                                      | TRBJ1-3 | 0.03 |
| TCL-055 | 0.01 | Polyclonal | polyclonal | 653  | TRBV11-2, TRBV11-1                          | TRBJ2-3 | 0.03 |
| TCL-040 | 0.01 | Polyclonal | polyclonal | 192  | TRBV6-5, TRBV6-2, TRBV6-3, TRBV6-6, TRBV6-8 | TRBJ1-5 | 0.04 |
| TCL-002 | 0.01 | Polyclonal | polyclonal | 370  | TRBV7-3                                     | TRBJ1-2 | 0.04 |
| TCL-048 | 0.01 | Polyclonal | polyclonal | 466  | TRBV6-4                                     | TRBJ2-3 | 0.04 |
| TCL-043 | 0.00 | Polyclonal | polyclonal | 291  | TRBV4-2                                     | TRBJ2-4 | 0.04 |
| TCL-056 | 0.00 | Polyclonal | polyclonal | 300  | TRBV15                                      | TRBJ2-1 | 0.05 |
| TCL-054 | 0.02 | Polyclonal | polyclonal | 339  | TRBV20-1                                    | TRBJ2-5 | 0.05 |
| TCL-062 | 0.03 | Polyclonal | polyclonal | 375  | TRBV28                                      | TRBJ2-7 | 0.05 |
| TCL-014 | 0.01 | Polyclonal | polyclonal | 185  | TRBV20-1                                    | TRBJ2-5 | 0.05 |

|         |      |            |            |     |          |         |      |
|---------|------|------------|------------|-----|----------|---------|------|
| TCL-058 | 0.01 | Polyclonal | polyclonal | 246 | TRBV20-1 | TRBJ2-1 | 0.06 |
| TCL-016 | 0.02 | Polyclonal | polyclonal | 337 | TRBV27   | TRBJ1-3 | 0.06 |
| TCL-028 | 0.01 | Polyclonal | polyclonal | 79  | TRBV2    | TRBJ1-2 | 0.06 |
| TCL-047 | 0.02 | Polyclonal | polyclonal | 369 | TRBV14   | TRBJ1-3 | 0.07 |
| TCL-044 | 0.03 | Polyclonal | polyclonal | 431 | TRBV19   | TRBJ1-1 | 0.08 |
| TCL-023 | 0.03 | Polyclonal | polyclonal | 216 | TRBV6-4  | TRBJ1-3 | 0.10 |
| TCL-061 | 0.02 | Polyclonal | polyclonal | 163 | TRBV24-1 | TRBJ1-6 | 0.10 |
| TCL-006 | 0.05 | Polyclonal | polyclonal | 39  | TRBV9    | TRBJ1-1 | 0.15 |
| TCL-011 | 0.05 | Polyclonal | polyclonal | 93  | TRBV27   | TRBJ1-3 | 0.19 |

Table 11.2: Sample summary with gamma VJ clonality scores

| sample                     | clonality.score.gamma | BIOMED.gamma | capTCRseq.gamma | VJ.counts.gamma | max.v.gamma                 | max.j.gamma   | max.clone.proportion.gamma |
|----------------------------|-----------------------|--------------|-----------------|-----------------|-----------------------------|---------------|----------------------------|
| A037                       | 0.003952569           | NA           | NA              | 759             | TRGV4                       | TRGJ1, TRGJ2  | 0.013175231                |
| L2D8                       | 0.985828167           | NA           | NA              | 1129            | TRGV4                       | TRGJ1, TRGJ2  | 0.991142604                |
| M36-EZM                    | 0.008474576           | NA           | NA              | 118             | TRGV3, TRGV5                | TRGJ1, TRGJ2  | 0.050847458                |
| M36-TIL2-1E7P3             | 0.022125813           | NA           | NA              | 2305            | TRGV9                       | TRGJP, TRGJ2  | 0.073752711                |
| OV7-TIL2                   | 0.120605469           | NA           | NA              | 2048            | TRGV10                      | TRGJ1, TRGJ2  | 0.3046875                  |
| SE14-2005                  | 0.439915966           | NA           | NA              | 2380            | TRGV3                       | TRGJ1, TRGJ2  | 0.555042017                |
| SE14-2033                  | 0.094612352           | NA           | NA              | 1522            | TRGV8                       | TRGJ1, TRGJ2  | 0.547306176                |
| SE14-2034                  | 0.052496799           | NA           | NA              | 1562            | TRGV2                       | TRGJP1, TRGJ2 | 0.526248399                |
| SE14-2035                  | 0.484712901           | NA           | NA              | 2682            | TRGV3                       | TRGJ1, TRGJ2  | 0.514541387                |
| STIM1-CY3                  | 0.113919544           | NA           | NA              | 2809            | TRGV9                       | TRGJ1, TRGJ2  | 0.198291207                |
| A037_CD3_1S                | 0.000510117           | NA           | NA              | 5881            | TRGV3, TRGV5                | TRGJ1, TRGJ2  | 0.00374086                 |
| A037_PBMC_1S               | 0.007246377           | NA           | NA              | 828             | TRGV9                       | TRGJ2         | 0.024154589                |
| A037_PBMC_TC<br>R_A        | 0.073170732           | NA           | NA              | 41              | TRGV8                       | TRGJP2        | 0.268292683                |
| A037_PBMC_TC<br>R_B        | 0.00618238            | NA           | NA              | 647             | TRGV2, TRGV3, TRGV5, TRGV5P | TRGJ1, TRGJ2  | 0.043276662                |
| A037_PBMC_TC<br>R_D        | 0.009090909           | NA           | NA              | 111             | TRGV7                       | TRGJ1, TRGJ2  | 0.036036036                |
| A037_PBMC_TC<br>R_E        | 0.004521964           | NA           | NA              | 3096            | TRGV8                       | TRGJ1, TRGJ2  | 0.018410853                |
| A037_PBMC_TC<br>R_F        | 0.005059022           | NA           | NA              | 2965            | TRGV9                       | TRGJ1, TRGJ2  | 0.019224283                |
| A037_PBMC_TC<br>R_G        | 0.077922078           | NA           | NA              | 77              | TRGV2                       | TRGJ1, TRGJ2  | 0.220779221                |
| A037_PBMC_TC<br>R_H        | 0.004545455           | NA           | NA              | 220             | TRGV10                      | TRGJ1, TRGJ2  | 0.045454545                |
| A037_PBMC_TC<br>R_J        | 0.007518797           | NA           | NA              | 133             | TRGV10                      | TRGJP1, TRGJ1 | 0.030075188                |
| A037_PBMC_TC<br>R_K        | 0.015151515           | NA           | NA              | 198             | TRGV9                       | TRGJ1, TRGJ2  | 0.035353535                |
| A037_PBMC_TC<br>R_L        | 0.008064516           | NA           | NA              | 124             | TRGV9                       | TRGJ1, TRGJ2  | 0.024193548                |
| 16_01_A037_PB<br>MC_TCR_F  | 0.003395586           | NA           | NA              | 589             | TRGV2                       | TRGJ1, TRGJ2  | 0.020373514                |
| 16_01_A037_PB<br>MC_TCR_H  | 0.005428882           | NA           | NA              | 921             | TRGV2                       | TRGJ1, TRGJ2  | 0.022801303                |
| 16_11_A037_PB<br>MC_TCR_VJ | 0.021875              | NA           | NA              | 320             | TRGV9                       | TRGJ1, TRGJ2  | 0.05                       |
| A037_PBMC_TC<br>R-JV       | 0.004919323           | NA           | NA              | 5082            | TRGV2                       | TRGJ1, TRGJ2  | 0.014364423                |
| H128_PBMC_TC<br>R-JV       | 0.029886611           | NA           | NA              | 13317           | TRGV9                       | TRGJ1, TRGJ2  | 0.064278741                |
| H129_PBMC_TC<br>R-JV       | 0.008526512           | NA           | NA              | 7506            | TRGV2                       | TRGJ1, TRGJ2  | 0.016786571                |
| H130_PBMC_TC<br>R-JV       | 0.017524131           | NA           | NA              | 10671           | TRGV2                       | TRGJ1, TRGJ2  | 0.035235686                |
| H131_PBMC_TC<br>R-JV       | 0.002162702           | NA           | NA              | 6011            | TRGV3                       | TRGJ1, TRGJ2  | 0.006488105                |
| H132_PBMC_TC<br>R-JV       | 0.006557377           | NA           | NA              | 9455            | TRGV4                       | TRGJ1, TRGJ2  | 0.013749339                |

|                      |             |            |            |       |        |                           |             |
|----------------------|-------------|------------|------------|-------|--------|---------------------------|-------------|
| H133_PBMC_TC<br>R-JV | 0.003499863 | NA         | NA         | 14572 | TRGV10 | TRGJP1                    | 0.006862476 |
| invivoscribe_neg     | NA          | NA         | NA         | NA    | NA     | NA                        | NA          |
| invivoscribe_pos     | NA          | NA         | NA         | NA    | NA     | NA                        | NA          |
| invivoscribe_A0      | NA          | NA         | NA         | NA    | NA     | NA                        | NA          |
| 37                   | NA          | NA         | NA         | NA    | NA     | NA                        | NA          |
| invivoscribe_H1      | NA          | NA         | NA         | NA    | NA     | NA                        | NA          |
| 28                   | NA          | NA         | NA         | NA    | NA     | NA                        | NA          |
| invivoscribe_H1      | NA          | NA         | NA         | NA    | NA     | NA                        | NA          |
| 29                   | NA          | NA         | NA         | NA    | NA     | NA                        | NA          |
| invivoscribe_H1      | NA          | NA         | NA         | NA    | NA     | NA                        | NA          |
| 30                   | NA          | NA         | NA         | NA    | NA     | NA                        | NA          |
| invivoscribe_H1      | NA          | NA         | NA         | NA    | NA     | NA                        | NA          |
| 31                   | NA          | NA         | NA         | NA    | NA     | NA                        | NA          |
| invivoscribe_H1      | NA          | NA         | NA         | NA    | NA     | NA                        | NA          |
| 32                   | NA          | NA         | NA         | NA    | NA     | NA                        | NA          |
| invivoscribe_H1      | NA          | NA         | NA         | NA    | NA     | NA                        | NA          |
| 33                   | NA          | NA         | NA         | NA    | NA     | NA                        | NA          |
| TCL-063              | 0.14        | Clonal     | clonal     | 334   | TRGV4  | TRGJ2,<br>TRGJ1           | 0.16        |
| TCL-019              | 0.22        | Clonal     | clonal     | 3579  | TRGV7  | TRGJ1,<br>TRGJ2           | 0.32        |
| TCL-034              | 0.17        | Clonal     | clonal     | 3478  | TRGV10 | TRGJP2                    | 0.23        |
| TCL-022              | 0.20        | Clonal     | clonal     | 1825  | TRGV4  | TRGJ2,<br>TRGJ1           | 0.24        |
| TCL-020              | 0.50        | Clonal     | clonal     | 1921  | TRGV9  | TRGJ1,<br>TRGJ2           | 0.50        |
| TCL-036              | 0.39        | Clonal     | clonal     | 4556  | TRGV8  | TRGJ2,<br>TRGJ1           | 0.41        |
| TCL-031              | 0.98        | Clonal     | clonal     | 463   | TRGV5  | TRGJ1,<br>TRGJ2           | 0.99        |
| TCL-053              | 0.39        | Clonal     | clonal     | 627   | TRGV2  | TRGJ1,<br>TRGJ2           | 0.45        |
| TCL-046              | 0.46        | Clonal     | clonal     | 908   | TRGV4  | TRGJ2                     | 0.50        |
| TCL-007              | 0.39        | Clonal     | clonal     | 2768  | TRGV5  | TRGJP2<br>TRGJ1           | 0.507586705 |
| TCL-050              | 0.18        | Clonal     | clonal     | 398   | TRGV10 | TRGJP1                    | 0.23        |
| TCL-030              | 0.05        | Clonal     | clonal     | 477   | TRGV2  | TRGJ1,<br>TRGJ2           | 0.12        |
| TCL-012              | 0.27        | Clonal     | clonal     | 2707  | TRGV3  | TRGJ2,<br>TRGJ1           | 0.528629479 |
| TCL-039              | 0.03        | Clonal     | polyclonal | 256   | TRGV10 | TRGJ1,<br>TRGJ2           | 0.09        |
| TCL-035              | 0.04        | Clonal     | polyclonal | 1871  | TRGV9  | TRGJ1,<br>TRGJ2           | 0.09        |
| TCL-004              | 0.03        | Clonal     | polyclonal | 186   | TRGV10 | TRGJ2                     | 0.091397849 |
| TCL-027              | 0.01        | Clonal     | polyclonal | 1239  | TRGV9  | TRGJP1<br>TRGJ1           | 0.05        |
| TCL-051              | 0.07        | Clonal     | polyclonal | 81    | TRGV2  | TRGJ2                     | 0.15        |
| TCL-005              | 0.09        | Clonal     | polyclonal | 220   | TRGV9  | TRGJP2<br>TRGJ1,<br>TRGJ2 | 0.140909091 |
| TCL-059              | 0.01        | Clonal     | polyclonal | 1535  | TRGV10 | TRGJ2                     | 0.04        |
| TCL-042              | 0.06        | Clonal     | polyclonal | 327   | TRGV8  | TRGJP1<br>TRGJ1,<br>TRGJ2 | 0.16        |
| TCL-052              | 0.00        | ND         | clonal     | 6168  | TRGV10 | TRGJ1,<br>TRGJ2           | 0.01        |
| TCL-032              | 0.01        | ND         | polyclonal | 446   | TRGV11 | TRGJ2,<br>TRGJ1           | 0.04        |
| TCL-037              | 0.01        | ND         | polyclonal | 989   | TRGV4  | TRGJ2                     | 0.02        |
| TCL-049              | 0.02        | Polyclonal | clonal     | 1418  | TRGV4  | TRGJ1,<br>TRGJ2           | 0.06        |

|         |      |                |            |      |                                       |                  |             |
|---------|------|----------------|------------|------|---------------------------------------|------------------|-------------|
| TCL-038 | 0.03 | Polyclona<br>I | clonal     | 851  | TRGV3                                 | TRGJ1,<br>TRGJ2  | 0.08        |
| TCL-041 | 0.15 | Polyclona<br>I | clonal     | 2265 | TRGV10                                | TRGJ1,<br>TRGJ2  | 0.21        |
| TCL-017 | 0.01 | Polyclona<br>I | clonal     | 181  | TRGV4                                 | TRGJ1,<br>TRGJ2  | 0.06        |
| TCL-024 | 0.01 | Polyclona<br>I | clonal     | 737  | TRGV4                                 | TRGJ1,<br>TRGJ2  | 0.04        |
| TCL-010 | 0.02 | Polyclona<br>I | clonal     | 2678 | TRGV2                                 | TRGJ1,<br>TRGJ2  | 0.066840926 |
| TCL-057 | 0.01 | Polyclona<br>I | polyclonal | 1451 | TRGV11                                | TRGJ1,<br>TRGJ2  | 0.02        |
| TCL-001 | 0.00 | Polyclona<br>I | polyclonal | 1888 | TRGV4                                 | TRGJ1,<br>TRGJ2  | 0.019067797 |
| TCL-026 | 0.05 | Polyclona<br>I | polyclonal | 821  | TRGV4                                 | TRGJ1,<br>TRGJ2  | 0.08        |
| TCL-045 | 0.01 | Polyclona<br>I | polyclonal | 137  | TRGV6                                 | TRGJP1<br>TRGJ1, | 0.07        |
| TCL-013 | 0.02 | Polyclona<br>I | polyclonal | 2341 | TRGV3                                 | TRGJ1,<br>TRGJ2  | 0.08        |
| TCL-008 | 0.01 | Polyclona<br>I | polyclonal | 1583 | TRGV4                                 | TRGJ1,<br>TRGJ2  | 0.031585597 |
| TCL-021 | 0.00 | Polyclona<br>I | polyclonal | 4230 | TRGV4                                 | TRGJ1,<br>TRGJ2  | 0.01        |
| TCL-033 | 0.00 | Polyclona<br>I | polyclonal | 1003 | TRGV10                                | TRGJP1<br>TRGJ1, | 0.01        |
| TCL-009 | 0.00 | Polyclona<br>I | polyclonal | 1112 | TRGV8                                 | TRGJ1,<br>TRGJ2  | 0.013489209 |
| TCL-015 | 0.00 | Polyclona<br>I | polyclonal | 1001 | TRGV7                                 | TRGJ1,<br>TRGJ2  | 0.01        |
| TCL-064 | 0.00 | Polyclona<br>I | polyclonal | 1703 | TRGV4                                 | TRGJ1,<br>TRGJ2  | 0.01        |
| TCL-029 | 0.00 | Polyclona<br>I | polyclonal | 965  | TRGV3, TRGV4, TRGV5,<br>TRGV5P, TRGV7 | TRGJ1,<br>TRGJ2  | 0.01        |
| TCL-018 | 0.00 | Polyclona<br>I | polyclonal | 679  | TRGV3, TRGV5                          | TRGJ1,<br>TRGJ2  | 0.01        |
| TCL-003 | 0.00 | Polyclona<br>I | polyclonal | 1758 | TRGV4                                 | TRGJ1,<br>TRGJ2  | 0.017064846 |
| TCL-060 | 0.01 | Polyclona<br>I | polyclonal | 1656 | TRGV8                                 | TRGJP2<br>TRGJ1, | 0.01        |
| TCL-025 | 0.01 | Polyclona<br>I | polyclonal | 500  | TRGV3, TRGV5                          | TRGJ1,<br>TRGJ2  | 0.02        |
| TCL-055 | 0.00 | Polyclona<br>I | polyclonal | 1320 | TRGV10                                | TRGJP1<br>TRGJ1, | 0.02        |
| TCL-040 | 0.00 | Polyclona<br>I | polyclonal | 443  | TRGV5, TRGV3                          | TRGJ1,<br>TRGJ2  | 0.02        |
| TCL-002 | 0.01 | Polyclona<br>I | polyclonal | 744  | TRGV3, TRGV5                          | TRGJ1,<br>TRGJ2  | 0.025537634 |
| TCL-048 | 0.00 | Polyclona<br>I | polyclonal | 815  | TRGV2                                 | TRGJ1,<br>TRGJ2  | 0.02        |
| TCL-043 | 0.01 | Polyclona<br>I | polyclonal | 318  | TRGV2                                 | TRGJ1,<br>TRGJ2  | 0.04        |
| TCL-056 | 0.03 | Polyclona<br>I | polyclonal | 540  | TRGV9                                 | TRGJP<br>TRGJ1,  | 0.07        |
| TCL-054 | 0.01 | Polyclona<br>I | polyclonal | 571  | TRGV3                                 | TRGJ1,<br>TRGJ2  | 0.03        |
| TCL-062 | 0.00 | Polyclona<br>I | polyclonal | 674  | TRGV10                                | TRGJP1<br>TRGJ1, | 0.03        |
| TCL-014 | 0.01 | Polyclona<br>I | polyclonal | 310  | TRGV9                                 | TRGJ1,<br>TRGJ2  | 0.04        |
| TCL-058 | 0.01 | Polyclona<br>I | polyclonal | 307  | TRGV11                                | TRGJP2<br>TRGJ1, | 0.04        |
| TCL-016 | 0.01 | Polyclona<br>I | polyclonal | 594  | TRGV4                                 | TRGJ1,<br>TRGJ2  | 0.03        |
| TCL-028 | 0.01 | Polyclona<br>I | polyclonal | 128  | TRGV9                                 | TRGJ1,<br>TRGJ2  | 0.05        |

|         |      |                |            |     |        |                  |             |
|---------|------|----------------|------------|-----|--------|------------------|-------------|
| TCL-047 | 0.01 | Polyclona<br>I | polyclonal | 524 | TRGV4  | TRGJ1,<br>TRGJ2  | 0.04        |
| TCL-044 | 0.03 | Polyclona<br>I | polyclonal | 694 | TRGV2  | TRGJ1,<br>TRGJ2  | 0.06        |
| TCL-023 | 0.00 | Polyclona<br>I | polyclonal | 440 | TRGV9  | TRGJP            | 0.04        |
| TCL-061 | 0.03 | Polyclona<br>I | polyclonal | 184 | TRGV2  | TRGJP2<br>TRGJ1, | 0.09        |
| TCL-006 | 0.08 | Polyclona<br>I | polyclonal | 26  | TRGV2  | TRGJ2            | 0.192307692 |
| TCL-011 | 0.05 | Polyclona<br>I | polyclonal | 275 | TRGV10 | TRGJ1,<br>TRGJ2  | 0.090909091 |

Table 11.3: Sample summaries with MiXCR metrics

| sample                 | Library Input | Total sequencing reads | Successfully aligned reads % | Alignment failed because of absence of V hits % | Alignment failed because of absence of J hits % | Final clonotype count | Reads used in clonotypes, percent of total |
|------------------------|---------------|------------------------|------------------------------|-------------------------------------------------|-------------------------------------------------|-----------------------|--------------------------------------------|
| A037                   | 100           | 1662388                | 2.15                         | 0.2                                             | 92.34                                           | 1266                  | 0.22                                       |
| L2D8                   | 100           | 1431726                | 2.37                         | 0.19                                            | 91.96                                           | 132                   | 0.38                                       |
| M36-EZM                | 100           | 1976892                | 1.97                         | 0.21                                            | 92.84                                           | 305                   | 0.09                                       |
| M36-TIL2-1E7P3         | 100           | 1369917                | 2.06                         | 0.14                                            | 92.52                                           | 686                   | 0.51                                       |
| OV7-TIL2               | 100           | 2054143                | 2.14                         | 0.18                                            | 92.2                                            | 491                   | 0.39                                       |
| CEM                    | 100           | 1199994                | 1.5                          | 0.05                                            | 93                                              | 65                    | 0.59                                       |
| Jurkat                 | 100           | 1178175                | 1.73                         | 0.12                                            | 93.14                                           | 107                   | 0.38                                       |
| MOLT4                  | 100           | 1104126                | 1.67                         | 0.12                                            | 93.29                                           | 42                    | 0.62                                       |
| SUPT1                  | 100           | 1496898                | 2.39                         | 0.14                                            | 91.32                                           | 148                   | 0.6                                        |
| STIM1-CY3              | 100           | 1615241                | 2.07                         | 0.18                                            | 92.16                                           | 305                   | 0.49                                       |
| A037_CD3_1S            | 100           | 4000917                | 2.53                         | 0.2                                             | 91.38                                           | 6724                  | 0.49                                       |
| A037_PBM C_1S          | 100           | 4062770                | 1.81                         | 0.19                                            | 91.39                                           | 1245                  | 0.13                                       |
| A037_PBM C_TCR_A       | 100           | 1793597                | 0.21                         | 0.06                                            | 91.07                                           | 46                    | 0.01                                       |
| A037_PBM C_TCR_B       | 200           | 9572076                | 0.31                         | 0.03                                            | 91.33                                           | 203                   | 0.03                                       |
| A037_PBM C_TCR_D       | 600           | 1134571                | 5                            | 0.14                                            | 91.06                                           | 459                   | 0.01                                       |
| A037_PBM C_TCR_E       | 800           | 8026681                | 1.97                         | 0.02                                            | 93.74                                           | 2550                  | 0.19                                       |
| A037_PBM C_TCR_F       | 1000          | 1252094                | 5                            | 1.12                                            | 92.38                                           | 3759                  | 0.11                                       |
| A037_PBM C_TCR_G       | 200           | 1065835                | 9                            | 0.11                                            | 90.89                                           | 56                    | 0.01                                       |
| A037_PBM C_TCR_H       | 600           | 8222076                | 0.9                          | 0.03                                            | 91.96                                           | 993                   | 0.06                                       |
| A037_PBM C_TCR_J       | 200           | 1666572                | 9                            | 0.07                                            | 90.77                                           | 480                   | 0.01                                       |
| A037_PBM C_TCR_K       | 600           | 8578864                | 0.15                         | 0.01                                            | 91.21                                           | 632                   | 0.01                                       |
| A037_PBM C_TCR_L       | 1000          | 2027832                | 5                            | 0.06                                            | 90.88                                           | 501                   | 0                                          |
| 16_01_A037_PBMC_TCR_F  | 500           | 4299090                | 0.68                         | 0.03                                            | 91.88                                           | 904                   | 0.06                                       |
| 16_01_A037_PBMC_TCR_H  | 250           | 6474282                | 0.83                         | 0.03                                            | 92.25                                           | 991                   | 0.07                                       |
| 16_11_A037_PBMC_TCR_VJ | 100           | 1889925                | 1.74                         | 0.31                                            | 89.96                                           | 720                   | 0.1                                        |
| A037_PBM C_TCR-JV      | 513           | 6296940                | 2.86                         | 0.44                                            | 89.2                                            | 7131                  | 0.27                                       |
| H128_PBM C_TCR-JV      | 1490          | 6775082                | 3.28                         | 0.41                                            | 89.15                                           | 12601                 | 0.52                                       |
| H129_PBM C_TCR-JV      | 600           | 7097646                | 2.74                         | 0.39                                            | 89.19                                           | 10078                 | 0.32                                       |
| H130_PBM C_TCR-JV      | 665           | 7788666                | 2.69                         | 0.38                                            | 89.31                                           | 10463                 | 0.37                                       |
| H131_PBM C_TCR-JV      | 695           | 7857953                | 2.62                         | 0.38                                            | 89.38                                           | 9074                  | 0.26                                       |
| H132_PBM               | 1550          | 7031963                | 3.12                         | 0.44                                            | 89                                              | 15690                 | 0.44                                       |

## C\_TCR-JV

|                       |     |         |       |      |       |       |       |
|-----------------------|-----|---------|-------|------|-------|-------|-------|
| H133_PBM<br>C_TCR-JV  | 675 | 7127161 | 3.59  | 0.46 | 88.88 | 17702 | 0.55  |
| invivoscribe<br>_neg  | 100 | 1445109 | 60.95 | 0.24 | 33.6  | 14682 | 7.68  |
| invivoscribe<br>_pos  | 100 | 2233912 | 57.36 | 0.13 | 37.85 | 14019 | 9.01  |
| invivoscribe<br>_A037 | 100 | 2161768 | 57.37 | 0.1  | 37.93 | 9530  | 6.92  |
| invivoscribe<br>_H128 | 100 | 2469927 | 59.25 | 0.16 | 35.3  | 18612 | 22.53 |
| invivoscribe<br>_H129 | 100 | 1666215 | 57.92 | 0.21 | 36.81 | 15346 | 6.83  |
| invivoscribe<br>_H130 | 100 | 2559070 | 59.97 | 0.13 | 35.27 | 12656 | 6.7   |
| invivoscribe<br>_H131 | 100 | 1811878 | 61.87 | 0.16 | 33.36 | 11088 | 9.53  |
| invivoscribe<br>_H132 | 100 | 2547352 | 60.26 | 0.14 | 34.91 | 17855 | 18.51 |
| invivoscribe<br>_H133 | 100 | 1629052 | 59.81 | 0.18 | 34.82 | 18838 | 19.89 |
| TCL-063               | 100 | 3364355 | 0.75  | 0.21 | 90.77 | 396   | 0.05  |
| TCL-019               | 100 | 5908050 | 2.3   | 0.16 | 91.34 | 1178  | 0.25  |
| TCL-034               | 100 | 6238274 | 2.19  | 0.14 | 91.45 | 814   | 0.21  |
| TCL-022               | 100 | 6227072 | 2.29  | 0.17 | 91.5  | 793   | 0.16  |
| TCL-020               | 100 | 3924635 | 0.76  | 0.15 | 90.76 | 110   | 0.24  |
| TCL-036               | 100 | 4205728 | 2.37  | 0.16 | 91.08 | 743   | 0.41  |
| TCL-031               | 100 | 3603354 | 0.36  | 0.1  | 90.69 | 74    | 0.04  |
| TCL-053               | 100 | 3021812 | 0.35  | 0.14 | 90.77 | 178   | 0.05  |
| TCL-046               | 100 | 4658895 | 0.24  | 0.08 | 90.75 | 88    | 0.05  |
| TCL-007               | 100 | 3974363 | 1.3   | 0.22 | 91.56 | 280   | 0.14  |
| TCL-050               | 100 | 4481688 | 0.32  | 0.13 | 90.72 | 262   | 0.03  |
| TCL-030               | 100 | 2752939 | 0.69  | 0.05 | 91.04 | 463   | 0.06  |
| TCL-012               | 100 | 5618429 | 0.68  | 0.11 | 90.96 | 656   | 0.11  |
| TCL-039               | 100 | 4486676 | 0.32  | 0.08 | 90.78 | 242   | 0.02  |
| TCL-035               | 100 | 4746431 | 2.11  | 0.31 | 91.18 | 1202  | 0.19  |
| TCL-004               | 100 | 3518652 | 1.25  | 0.19 | 91.75 | 213   | 0.06  |
| TCL-051               | 100 | 5754173 | 0.29  | 0.07 | 90.68 | 172   | 0.01  |
| TCL-005               | 100 | 4397521 | 1.28  | 0.19 | 91.81 | 214   | 0.06  |
| TCL-059               | 100 | 4592030 | 2.11  | 0.27 | 91.34 | 923   | 0.17  |
| TCL-042               | 100 | 4303321 | 1.25  | 0.19 | 91.61 | 218   | 0.06  |
| TCL-052               | 100 | 7501730 | 1.58  | 0.09 | 91.4  | 3138  | 0.29  |
| TCL-032               | 100 | 4350896 | 0.7   | 0.04 | 91.35 | 536   | 0.05  |
| TCL-037               | 100 | 5525248 | 1.29  | 0.16 | 91.73 | 481   | 0.08  |
| TCL-049               | 100 | 3713745 | 1.27  | 0.17 | 91.61 | 647   | 0.13  |
| TCL-038               | 100 | 5344892 | 2.19  | 0.2  | 91.58 | 546   | 0.12  |
| TCL-041               | 100 | 4990390 | 2.21  | 0.2  | 91.35 | 871   | 0.2   |
| TCL-017               | 100 | 3619902 | 0.34  | 0.12 | 90.78 | 252   | 0.02  |
| TCL-024               | 100 | 5507224 | 1.33  | 0.14 | 91.85 | 480   | 0.08  |
| TCL-010               | 100 | 4068539 | 1.22  | 0.17 | 91.61 | 648   | 0.19  |

|         |     |         |      |      |       |      |      |
|---------|-----|---------|------|------|-------|------|------|
| TCL-057 | 100 | 5056319 | 2.13 | 0.28 | 91.24 | 1169 | 0.17 |
| TCL-001 | 100 | 3752739 | 1.72 | 0.04 | 91.55 | 798  | 0.19 |
| TCL-026 | 100 | 6906974 | 2.24 | 0.17 | 91.58 | 651  | 0.12 |
| TCL-045 | 100 | 4275809 | 2.14 | 0.34 | 91.4  | 237  | 0.09 |
| TCL-013 | 100 | 5620960 | 0.67 | 0.13 | 90.69 | 1055 | 0.11 |
| TCL-008 | 100 | 6682740 | 1.39 | 0.13 | 91.71 | 694  | 0.12 |
| TCL-021 | 100 | 6578214 | 2.13 | 0.15 | 91.52 | 2579 | 0.26 |
| TCL-033 | 100 | 3503115 | 0.77 | 0.04 | 90.95 | 1290 | 0.1  |
| TCL-009 | 100 | 4700631 | 0.76 | 0.06 | 90.9  | 1400 | 0.08 |
| TCL-015 | 100 | 4487351 | 0.7  | 0.08 | 90.87 | 1350 | 0.08 |
| TCL-064 | 100 | 5237019 | 2.09 | 0.3  | 91.35 | 1172 | 0.16 |
| TCL-029 | 100 | 4170770 | 0.78 | 0.07 | 90.79 | 1436 | 0.09 |
| TCL-018 | 100 | 5351255 | 0.77 | 0.08 | 91    | 1044 | 0.05 |
| TCL-003 | 100 | 4697461 | 1.51 | 0.06 | 91.77 | 886  | 0.15 |
| TCL-060 | 100 | 4605546 | 2.14 | 0.29 | 91.13 | 1109 | 0.17 |
| TCL-025 | 100 | 4866375 | 0.69 | 0.06 | 90.62 | 785  | 0.05 |
| TCL-055 | 100 | 5009935 | 1.24 | 0.16 | 91.7  | 702  | 0.1  |
| TCL-040 | 100 | 4491531 | 0.33 | 0.09 | 90.69 | 511  | 0.03 |
| TCL-002 | 100 | 3891245 | 1.24 | 0.2  | 91.69 | 469  | 0.09 |
| TCL-048 | 100 | 5379058 | 2.14 | 0.27 | 91.36 | 609  | 0.12 |
| TCL-043 | 100 | 5232483 | 2.21 | 0.21 | 91.61 | 379  | 0.1  |
| TCL-056 | 100 | 5528712 | 2.15 | 0.31 | 91.22 | 421  | 0.11 |
| TCL-054 | 100 | 5491623 | 2.15 | 0.33 | 91.2  | 452  | 0.11 |
| TCL-062 | 100 | 3354742 | 0.7  | 0.13 | 90.77 | 867  | 0.07 |
| TCL-014 | 100 | 3848069 | 0.83 | 0.14 | 91.21 | 228  | 0.04 |
| TCL-058 | 100 | 4919699 | 1.28 | 0.2  | 91.78 | 270  | 0.06 |
| TCL-016 | 100 | 5073779 | 1.3  | 0.18 | 91.62 | 542  | 0.08 |
| TCL-028 | 100 | 5931733 | 0.32 | 0.09 | 90.72 | 252  | 0.02 |
| TCL-047 | 100 | 4969966 | 2.09 | 0.38 | 91.1  | 396  | 0.11 |
| TCL-044 | 100 | 6164907 | 2.15 | 0.25 | 91.59 | 509  | 0.11 |
| TCL-023 | 100 | 5073756 | 1.31 | 0.21 | 91.76 | 290  | 0.07 |
| TCL-061 | 100 | 5599126 | 2.16 | 0.3  | 91.26 | 271  | 0.1  |
| TCL-006 | 100 | 4787256 | 0.33 | 0.08 | 90.86 | 116  | 0.01 |
| TCL-011 | 100 | 2264111 | 1.24 | 0.22 | 91.75 | 188  | 0.07 |
